# Supplementary material for: The corrosion inhibition of stainless steel by ferrocene–polyoxometalate hybrid molecular materials – experimental and first principles studies
Source: Royal Society of Chemistry journal article supplement (doi:10.1039/c9cp06284j), 2020-01-01
Supplement: c9cp06284j2.pdf [file c9cp06284j2.pdf]

Corrected Supporting information for

**The corrosion inhibition of stainless steel by ferrocene-polyoxometalate hybrid  
molecular materials – experimental and first principles studies**

DOI: 10.1039/c9cp06284j

G. Sruthi<sup>a</sup>, K. Shakeela<sup>b</sup>, R. Shanmugam<sup>a</sup> and G. Ranga Rao<sup>a\*</sup>

<sup>a</sup>Department of Chemistry and DST-IITM Solar Energy Harnessing Centre (DSEHC) Indian Institute of Technology Madras, Chennai 600036, India

<sup>b</sup>Department of Chemistry, B.S. Abdur Rahman Crescent Institute of Science and Technology, Vandalur, Chennai 600048, India

This updated version of the Electronic Supporting Information published on 24 Jun 2021 replaces the original version published on 23 Jan 2020.

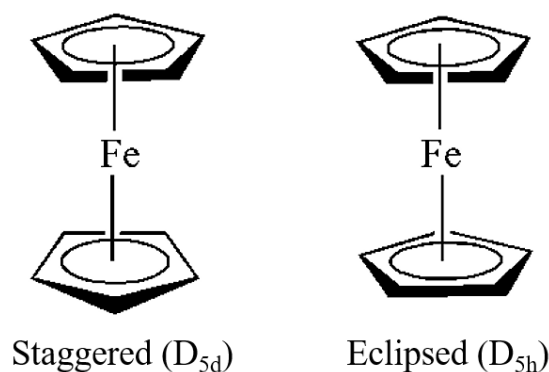

**Figure S1** Staggered and eclipsed forms of ferrocene.

---

\*Corresponding author; Tel.: +91 44 2257 4226; Fax: +91 44 2257 4202; E-mail address:

[grrao@iitm.ac.in](mailto:grrao@iitm.ac.in) (G. Ranga Rao).

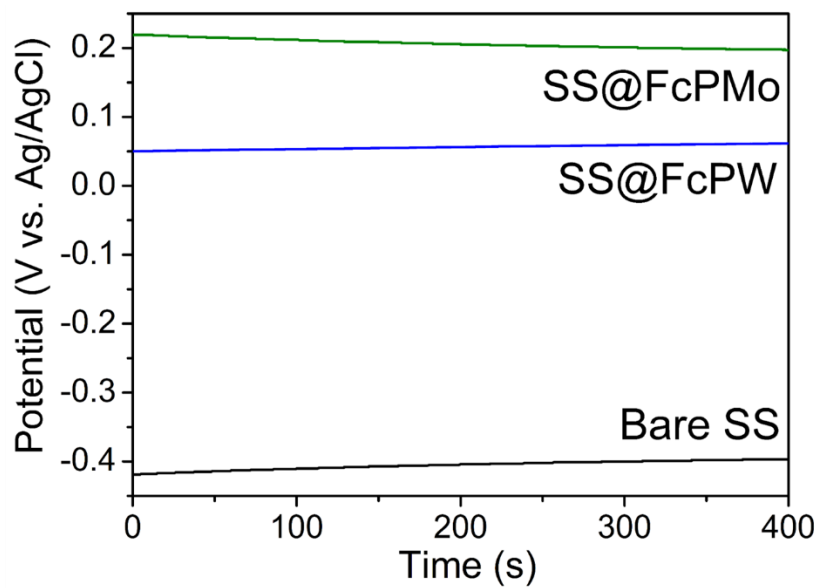

**Figure S2** Steady state open circuit potential vs. time for bare SS, SS@FcPW and SS@FcPMo.

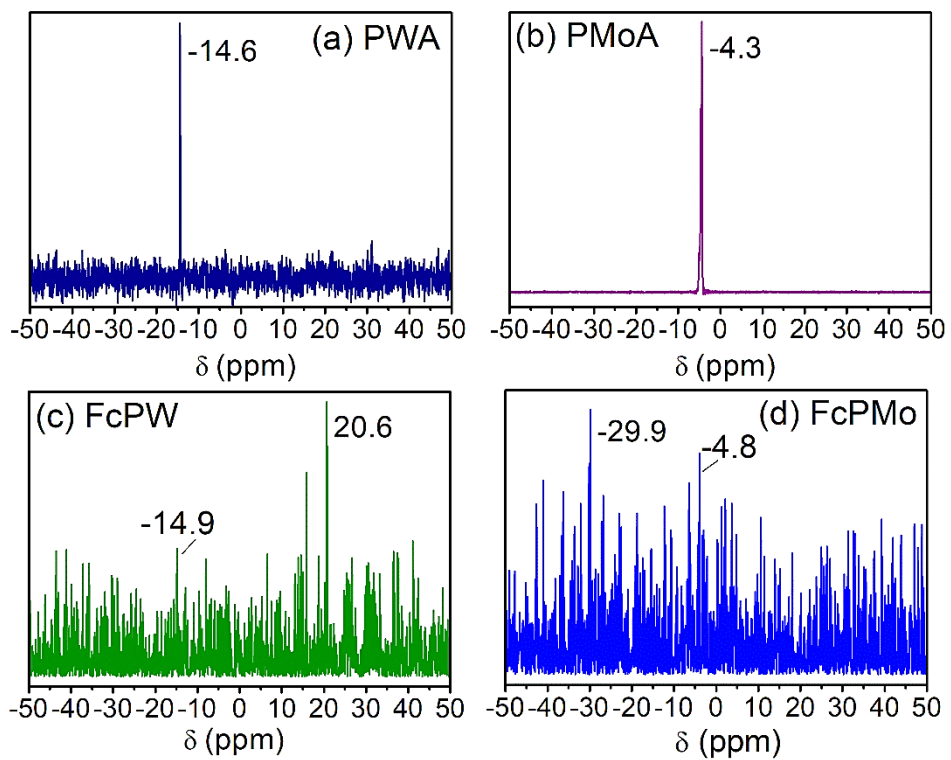

**Figure S3**  $^{31}\text{P}$  MAS spectra of (a) PWA, (b) PMoA, (c) FcPW and (d) FcPMo.

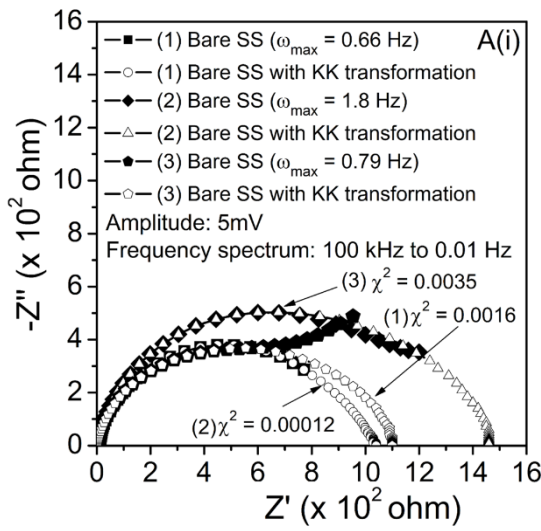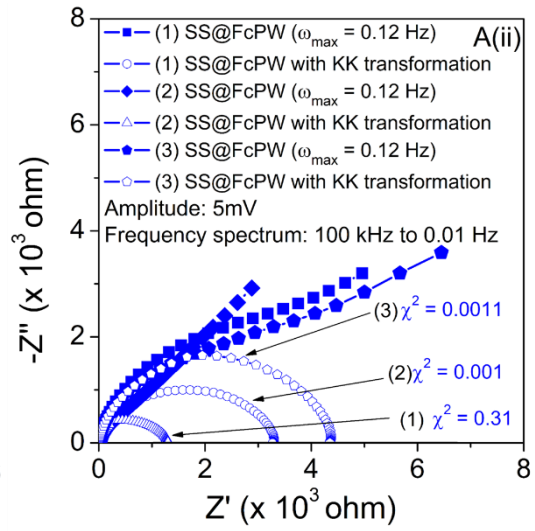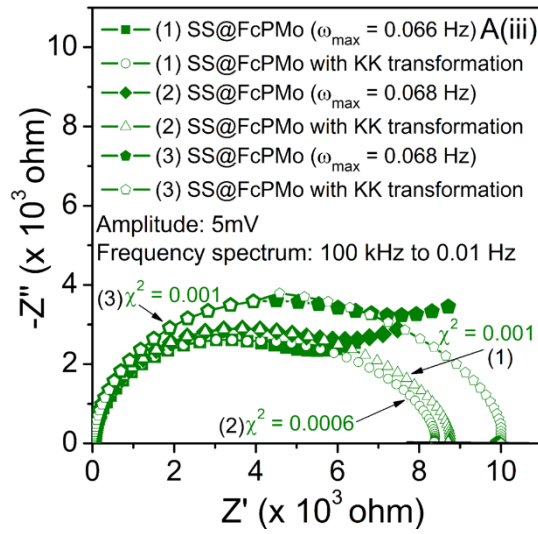

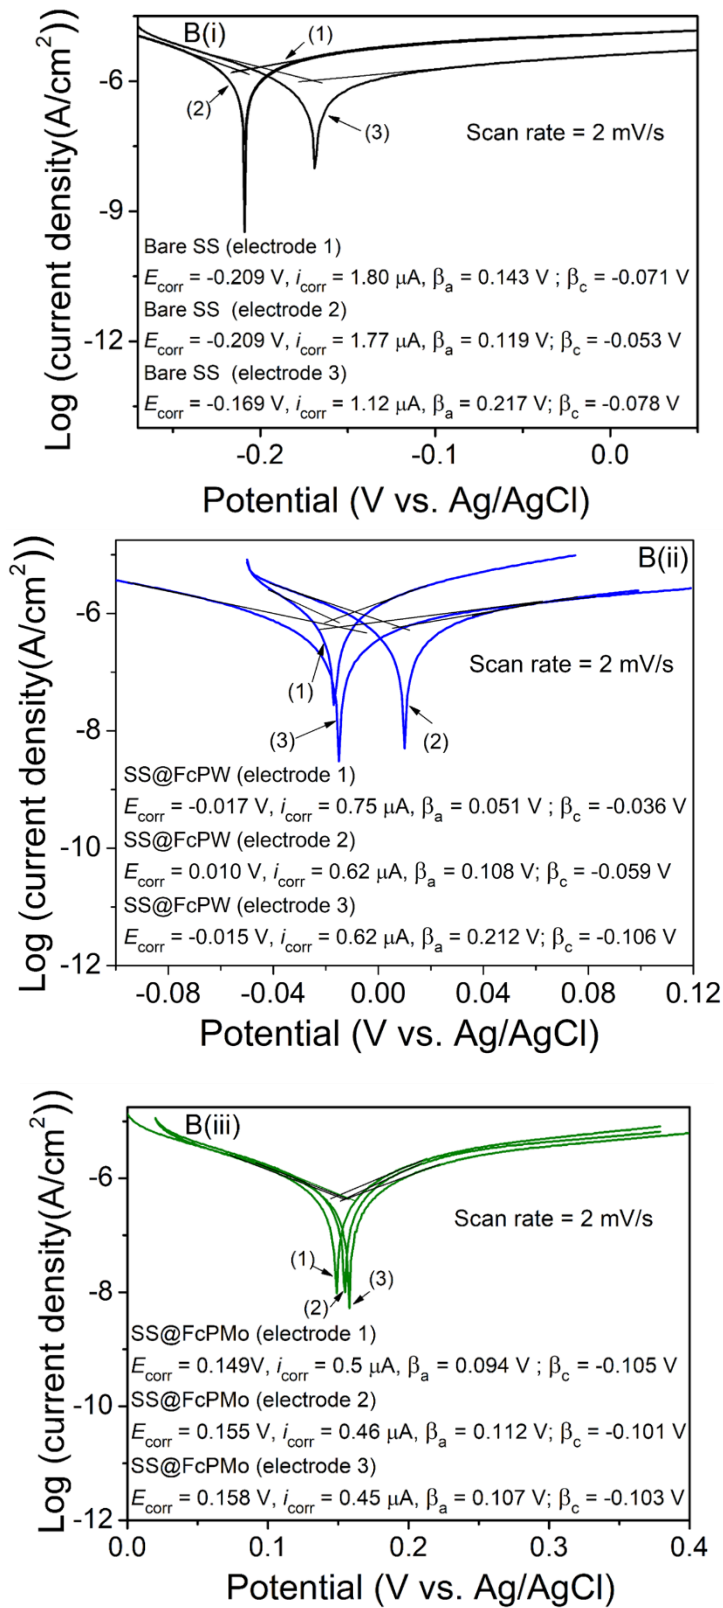

**Figure S4** (A) Nyquist and (B) Tafel plots for repeated corrosion test experiments each for (i) bare SS, (ii) SS@FcPW and (iii) SS@FcPMo in 0.5 M  $\text{H}_2\text{SO}_4$ .

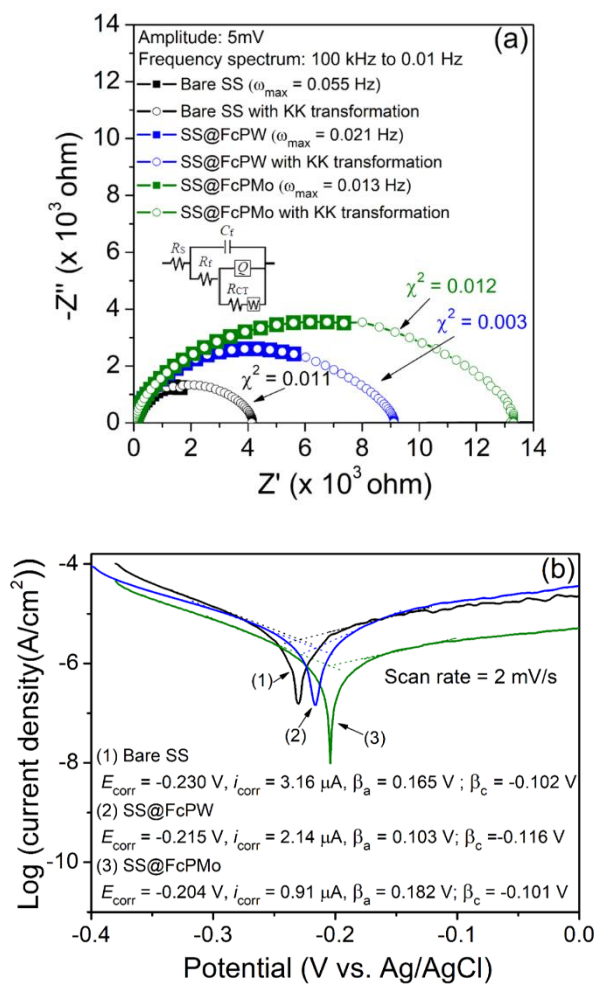

**Figure S5** (a) EIS of SS, SS@FcPW, SS@FcPMo and (b) Tafel plots of SS, SS@FcPW and SS@FcPMo with Ringer's solution as electrolyte.

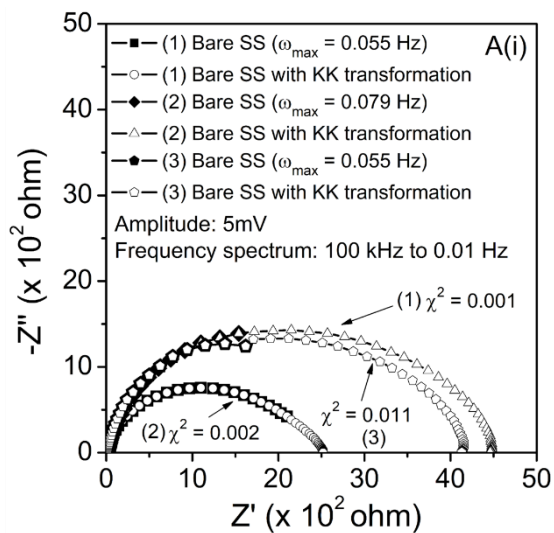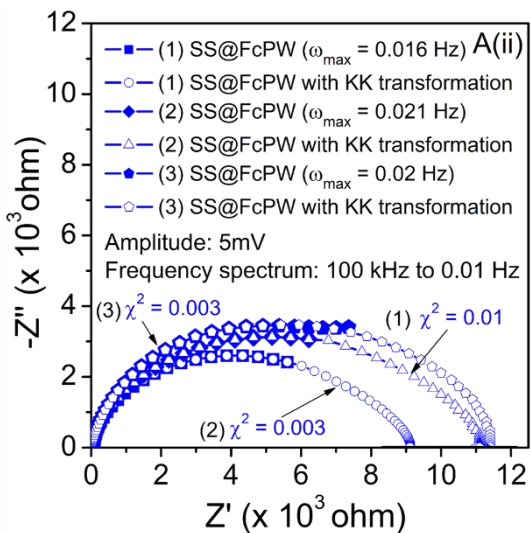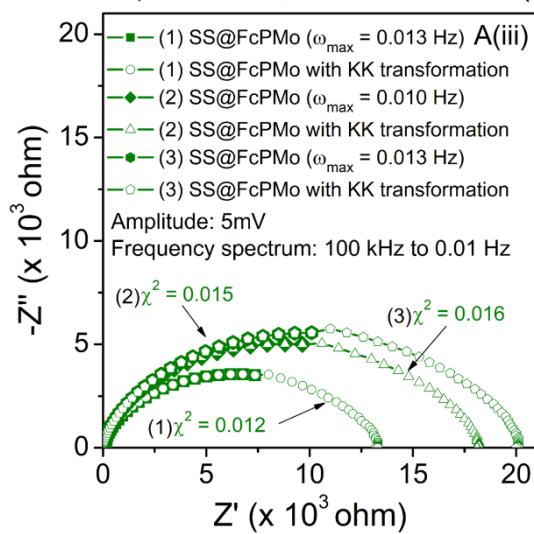

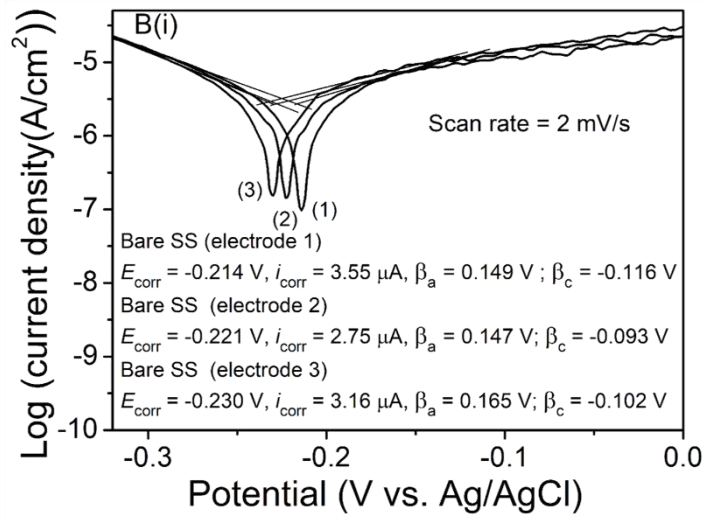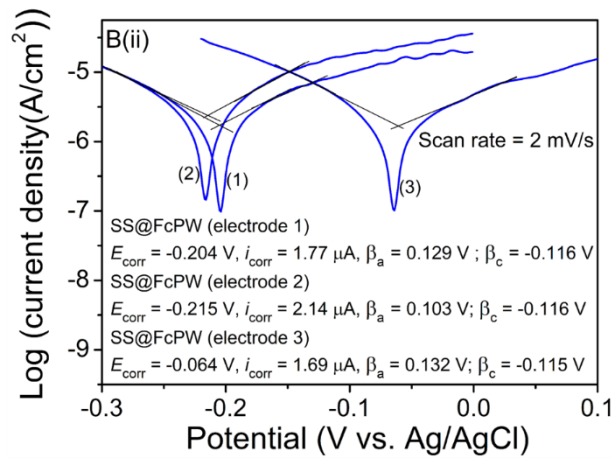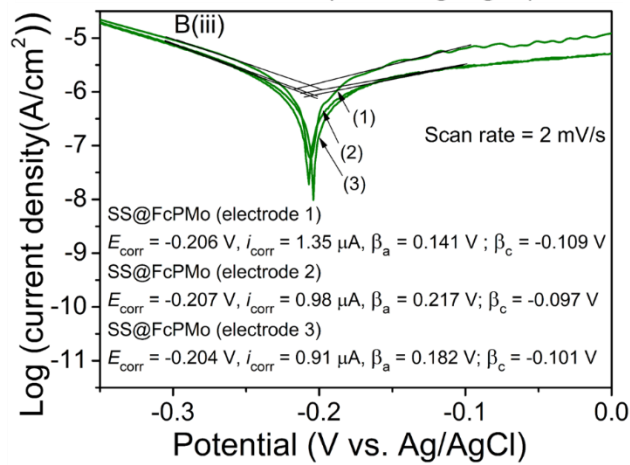



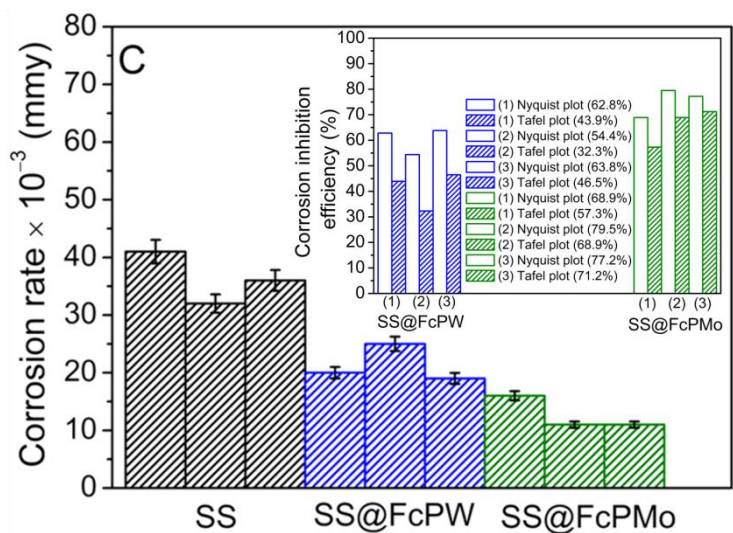

**Figure S6** (A) Nyquist, (B) Tafel plots of triplicate experiments on corrosion studies of bare SS, SS@FcPMo and SS@FcPW in Ringer's solution. (C) Reproducibility tests with error bars [Fig. S6(C) is corrected, but the inset of the figure S6(C) has no change].

**Table S1** Pore size and pore volume from BET

| <b>Hybrid material</b> | <b>Pore size</b>                     | <b>Pore volume</b>                                                                                       |
|------------------------|--------------------------------------|----------------------------------------------------------------------------------------------------------|
| FcPW                   | $4.2 \pm 0.025 \text{ m}^2/\text{g}$ | Total pore volume of pores less than 1032.3 Å radius at $P/P_0 = 0.99$ was $0.013 \text{ cm}^3/\text{g}$ |
| FcPMo                  | $6.8 \pm 0.094 \text{ m}^2/\text{g}$ | Total pore volume of pores less than 1191.8 Å radius at $P/P_0 = 0.99$ was $0.047 \text{ cm}^3/\text{g}$ |

**Table S2** Parameters obtained from triplicate experiments for corrosion study in 0.5 M H<sub>2</sub>SO<sub>4</sub>

| Electrode              | $E_{\text{corr}}$ (V)               | $i_{\text{corr}}$ ( $\mu\text{A}$ ) | $R_{\text{CT}}$ (ohm $\text{cm}^2$ ) $\eta$ (%) w.r.t. SS2 (cal.) | $R_p$ (ohm $\text{cm}^2$ )    | Rate (mmy) from Tafel extrapolation method | Standard deviation | Corrosion inhibition efficiency $\eta$ (%) w.r.t. SS2 (cal.) |
|------------------------|-------------------------------------|-------------------------------------|-------------------------------------------------------------------|-------------------------------|--------------------------------------------|--------------------|--------------------------------------------------------------|
| SS1 <sup>a</sup>       | #Instr.: - 0.209<br>*Calc.: - 0.209 | Instr.: 2.1<br>Calc.: 1.8           | 1102                                                              | Instr.: 9192<br>Calc.: 11445  | 0.0209                                     | 0.0045             | –                                                            |
| SS2 <sup>a</sup>       | Instr.: - 0.209<br>Calc.: - 0.209   | Instr.: 2.1<br>Calc.: 1.77          | 1040                                                              | Instr.: 8804<br>Calc.: 8995   | 0.0205                                     |                    | –                                                            |
| SS3 <sup>a</sup>       | Instr.: - 0.169<br>Calc.: - 0.169   | Instr.: 0.93<br>Calc.: 1.12         | 1458                                                              | Instr.: 25800<br>Calc.: 22244 | 0.0130                                     |                    | –                                                            |
| SS@FcPW1 <sup>b</sup>  | Instr.: - 0.017<br>Calc.: - 0.017   | Instr.: 0.68<br>Calc.: 0.75         | 1309                                                              | Instr.: 11961<br>Calc.: 12218 | 0.0087                                     | 0.00087            | EIS: 20.5<br>Tafel: 57.6                                     |
| SS@FcPW2 <sup>b</sup>  | Instr.: 0.010<br>Calc.: 0.010       | Instr.: 0.62<br>Calc.: 0.62         | 3285                                                              | Instr.: 26222<br>Calc.: 26722 | 0.0072                                     |                    | EIS: 68.3<br>Tafel: 64.9                                     |
| SS@FcPW3 <sup>b</sup>  | Instr.: - 0.015<br>Calc.: - 0.015   | Instr.: 0.62<br>Calc.: 0.62         | 4355                                                              | Instr.: 38079<br>Calc.: 49491 | 0.0072                                     |                    | EIS: 76.1<br>Tafel: 64.9                                     |
| SS@FcPMo1 <sup>c</sup> | Instr.: 0.149<br>Calc.: 0.149       | Instr.: 0.49<br>Calc.: 0.50         | 8702                                                              | Instr.: 34544<br>Calc.: 43072 | 0.0058                                     | 0.00032            | EIS: 88.0<br>Tafel: 71.7                                     |
| SS@FcPMo2 <sup>c</sup> | Instr.: 0.155<br>Calc.: 0.155       | Instr.: 0.56<br>Calc.: 0.46         | 8375                                                              | Instr.: 33344<br>Calc.: 37194 | 0.0053                                     |                    | EIS: 87.6<br>Tafel: 74.0                                     |
| SS@FcPMo3 <sup>c</sup> | Instr.: 0.158<br>Calc.: 0.158       | Instr.: 0.54<br>Calc.: 0.45         | 9958                                                              | Instr.: 39269<br>Calc.: 49539 | 0.0052                                     |                    | EIS: 89.5<br>Tafel: 74.5                                     |

<sup>#</sup>Instr. From CH Instrument software

\*Calc. From Tafel extrapolation method

<sup>a</sup>Relative error (%): 14.2%, std. dev. = 0.0045

<sup>b</sup>Relative error (%): 6.5%, std. dev. = 0.00087

<sup>c</sup>Relative error (%): 3.4%, std. dev. = 0.00032

**Table S3** Parameters obtained from Nyquist plot for corrosion studies in Ringer's solution

| <b>Electrode</b>                  | $R_s$<br>(ohm<br>$\text{cm}^2$ ) | $C_f$<br>( $\mu\text{F}/\text{cm}^2$ ) | $R_f$<br>(ohm<br>$\text{cm}^2$ ) | $Q_{dl}$<br>( $\mu\text{F}/\text{cm}^2$ ) | $R_{CT}$<br>(ohm<br>$\text{cm}^2$ ) | $\omega_{max}$<br>(Hz) |
|-----------------------------------|----------------------------------|----------------------------------------|----------------------------------|-------------------------------------------|-------------------------------------|------------------------|
| Bare Steel<br>(SS)<br>(316 grade) | 0.01                             | -                                      | 12.6                             | 496.5                                     | 4155                                | 0.055                  |
| SS@FcPW                           | 12.2                             | 271.5                                  | 0.0013                           | 263.3                                     | 9115                                | 0.021                  |
| SS@FcPMo                          | 11.9                             | 166.3                                  | 0.0089                           | 239.2                                     | 13357                               | 0.013                  |

**Table S4** Calculation from Tafel plots of electrodes immersed in Ringer's solution using Tafel extrapolation method

| <b>Electrode</b> | $E_{corr}$<br>(V) | $i_{corr}$<br>( $\mu\text{A}/\text{cm}^2$ ) | $R_p$<br>(ohm<br>$\text{cm}^2$ ) | <b>Corrosion rate (mmy)</b> | <b>%Corrosion inhibition</b> |
|------------------|-------------------|---------------------------------------------|----------------------------------|-----------------------------|------------------------------|
| SS               | -0.230            | 3.16                                        | 7709                             | 0.036                       | -                            |
| SS@FcPW          | -0.215            | 2.14                                        | 11070                            | 0.025                       | 32.3                         |
| SS@FcPMo         | -0.204            | 0.91                                        | 30993                            | 0.011                       | 71.2                         |

**Table S5** Experimental errors and standard deviations from triplicate experiments for corrosion study in Ringer's solution

| Electrode              | Tafel plot parameters |                                     |                               |                               |                               | Nyquist plots                        |                       |
|------------------------|-----------------------|-------------------------------------|-------------------------------|-------------------------------|-------------------------------|--------------------------------------|-----------------------|
|                        | $E_{\text{corr}}$ (V) | $i_{\text{corr}}$ ( $\mu\text{A}$ ) | Corrosion rate (mmy)          | $\eta$ (%) w.r.t. SS3 (calc.) | $R_p$ (ohm $\text{cm}^2$ )    | $R_{\text{CT}}$ (ohm $\text{cm}^2$ ) | $\eta$ (%) w.r.t. SS3 |
| SS 1 <sup>a</sup>      | -0.214                | #Instr.: 3.47<br>*Calc.: 3.55       | Instr.: 0.040<br>Calc.: 0.041 | -                             | Instr.: 7946<br>Calc.: 8962   | 4494                                 | -                     |
| SS 2 <sup>a</sup>      | -0.223                | Instr.: 3.6<br>Calc.: 2.75          | Instr.: 0.042<br>Calc.: 0.032 | -                             | Instr.: 6710<br>Calc.: 8994   | 2514                                 | -                     |
| SS 3 <sup>a</sup>      | -0.230                | Instr.: 3.6<br>Calc.: 3.16          | Instr.: 0.042<br>Calc.: 0.036 | -                             | Instr.: 7642<br>Calc.: 7709   | 4155                                 | -                     |
| SS@FcPW1 <sup>b</sup>  | -0.204                | Instr.: 3.55<br>Calc.: 1.77         | Instr.: 0.041<br>Calc.: 0.020 | 43.9                          | Instr.: 10490<br>Calc.: 14983 | 11174                                | 62.8                  |
| SS@FcPW2 <sup>b</sup>  | -0.215                | Instr.: 2.85<br>Calc.: 2.14         | Instr.: 0.033<br>Calc.: 0.025 | 32.3                          | Instr.: 8428<br>Calc.: 11070  | 9115                                 | 54.4                  |
| SS@FcPW3 <sup>b</sup>  | -0.064                | Instr.: 2.32<br>Calc.: 1.69         | Instr.: 0.027<br>Calc.: 0.019 | 46.5                          | Instr.: 11367<br>Calc.: 15790 | 11479                                | 63.8                  |
| SS@FcPMo1 <sup>c</sup> | -0.206                | Instr.: 1.68<br>Calc.: 1.35         | Instr.: 0.019<br>Calc.: 0.016 | 57.3                          | Instr.: 15996<br>Calc.: 19773 | 13357                                | 68.9                  |
| SS@FcPMo2 <sup>c</sup> | -0.207                | Instr.: 1.13<br>Calc.: 0.98         | Instr.: 0.013<br>Calc.: 0.011 | 68.9                          | Instr.: 24840<br>Calc.: 29701 | 20281                                | 79.5                  |
| SS@FcPMo3 <sup>c</sup> | -0.204                | Instr.: 1.16<br>Calc.: 0.91         | Instr.: 0.013<br>Calc.: 0.011 | 71.2                          | Instr.: 24781<br>Calc.: 30993 | 18211                                | 77.2                  |

#Instr.. From CH Instrument software

\*Calc. From Tafel extrapolation method

<sup>a</sup>Relative error (%): 7.2%, std. dev. = 0.0045

<sup>b</sup>Relative error (%): 8.7%, std. dev. = 0.0032

<sup>c</sup>Relative error (%): 13.2%, std. dev. = 0.0029

**Table S6** Bond angles between atoms in FcPW optimized structure in aqueous phase

| Atoms  | Bond length (Å) | Atoms    | Bond length (Å) | Atoms    | Bond length (Å) | Atoms     | Bond length (Å) |
|--------|-----------------|----------|-----------------|----------|-----------------|-----------|-----------------|
| W1-O18 | 1.718           | W8-O39   | 1.8895          | C56-H66  | 1.0848          | C83-H92   | 1.0864          |
| W1-O19 | 1.906           | W8-O53   | 1.7321          | C57-C58  | 1.4289          | C84-C85   | 1.4321          |
| W1-O21 | 1.943           | W9-O16   | 1.9338          | C57-H67  | 1.0855          | C84-H93   | 1.0867          |
| W1-O26 | 1.929           | W9-O20   | 1.9146          | C58-C59  | 1.4238          | C85-H94   | 1.0861          |
| W1-O37 | 2.4             | W9-O28   | 1.9348          | C58-H68  | 1.0878          | C96-Fe97  | 2.1298          |
| W1-O39 | 1.962           | W9-O32   | 1.9128          | C59-H69  | 1.0868          | C96-C98   | 1.4225          |
| W2-O14 | 1.92            | W9-O42   | 2.488           | C60-C61  | 1.4373          | C96-C99   | 1.4265          |
| W2-O20 | 1.917           | W9-O44   | 1.7174          | C60-C64  | 1.4308          | C96-H107  | 1.0859          |
| W2-O22 | 2.497           | W10-O14  | 1.9496          | C60-H70  | 1.087           | Fe97-C98  | 2.1109          |
| W2-O25 | 1.917           | W10-O22  | 2.4762          | C61-C62  | 1.4377          | Fe97-C99  | 2.0712          |
| W2-O38 | 1.967           | W10-O24  | 1.9306          | C61-H71  | 1.0864          | Fe97-C100 | 2.0284          |
| W2-O48 | 1.724           | W10-O31  | 1.9299          | C62-C63  | 1.4291          | Fe97-C101 | 2.0495          |
| W3-O17 | 1.908           | W10-O34  | 1.9101          | C62-H72  | 1.0863          | Fe97-C102 | 2.0632          |
| W3-O19 | 1.958           | W10-O52  | 1.726           | C63-C64  | 1.4256          | Fe97-C103 | 2.0597          |
| W3-O30 | 1.929           | W11-O27  | 1.9052          | C63-H73  | 1.0865          | Fe97-C104 | 2.0874          |
| W3-O33 | 2.464           | W11-O30  | 1.929           | C64-H74  | 1.0866          | Fe97-C105 | 2.0996          |
| W3-O40 | 1.962           | W11-O31  | 1.9672          | C75-Fe76 | 2.0539          | Fe97-C106 | 2.0836          |
| W3-O46 | 1.709           | W11-O33  | 2.4345          | C75-C77  | 1.4369          | C98-C101  | 1.4307          |
| W4-O26 | 1.925           | W11-O41  | 1.9232          | C75-C78  | 1.4338          | C98-H108  | 1.0849          |
| W4-O29 | 1.896           | W11-O49  | 1.7254          | C75-H86  | 1.0861          | C99-C100  | 1.4359          |
| W4-O35 | 1.94            | W12-O35  | 1.9221          | Fe76-C77 | 2.0371          | C99-H109  | 1.0841          |
| W4-O36 | 1.929           | W12-O40  | 1.9033          | Fe76-C78 | 2.0958          | C100-C101 | 1.4366          |
| W4-O51 | 1.73            | W12-O41  | 1.943           | Fe76-C79 | 2.1061          | C100-H110 | 1.0847          |
| W5-O17 | 1.941           | W12-O45  | 1.7217          | Fe76-C80 | 2.0642          | C101-H111 | 1.085           |
| W5-O21 | 1.929           | W12-O47  | 1.9423          | Fe76-C81 | 2.1045          | C102-C103 | 1.4358          |
| W5-O22 | 2.452           | P13-O22  | 1.5471          | Fe76-C82 | 2.0559          | C102-C106 | 1.4305          |
| W5-O25 | 1.932           | P13-O33  | 1.5492          | Fe76-C83 | 2.0346          | C102-H112 | 1.0859          |
| W5-O34 | 1.954           | P13-O37  | 1.5526          | Fe76-C84 | 2.0597          | C103-C104 | 1.4323          |
| W5-O50 | 1.709           | P13-O42  | 1.5392          | Fe76-C85 | 2.1019          | C103-H113 | 1.0847          |
| W6-O16 | 1.963           | C54-Fe55 | 2.0346          | C77-C80  | 1.435           | C104-C105 | 1.4269          |
| W6-O23 | 1.883           | C54-C56  | 1.4377          | C77-H87  | 1.0869          | C104-H114 | 1.0843          |
| W6-O29 | 1.961           | C54-C57  | 1.4382          | C78-C79  | 1.425           | C105-C106 | 1.4275          |
| W6-O43 | 1.717           | C54-H65  | 1.0862          | C78-H88  | 1.0872          | C105-H115 | 1.0845          |
| W6-O47 | 1.898           | Fe55-C56 | 2.0469          | C79-C80  | 1.4274          | C106-H116 | 1.0864          |
| W7-O15 | 1.711           | Fe55-C57 | 2.0738          | C79-H89  | 1.0862          | O117-H118 | 0.9684          |
| W7-O23 | 1.955           | Fe55-C58 | 2.1231          | C80-H90  | 1.0856          | O117-H119 | 0.9705          |
| W7-O24 | 1.904           | Fe55-C59 | 2.1031          | C81-C82  | 1.429           | O120-H121 | 0.9722          |
| W7-O27 | 1.929           | Fe55-C60 | 2.0584          | C81-C85  | 1.4246          | O120-H122 | 0.9706          |

|        |       |          |        |         |        |           |        |
|--------|-------|----------|--------|---------|--------|-----------|--------|
| W7-O32 | 1.927 | Fe55-C61 | 2.04   | C81-H95 | 1.0864 | O123-H124 | 0.9684 |
| W7-O42 | 2.481 | Fe55-C62 | 2.0675 | C82-C83 | 1.4374 | O123-H125 | 0.9697 |
| W8-O28 | 1.914 | Fe55-C63 | 2.1094 | C82-H91 | 1.0856 | O126-H127 | 0.9693 |
| W8-O36 | 1.975 | Fe55-C64 | 2.1029 | C83-C84 | 1.4374 | O126-H128 | 0.9698 |
| W8-O38 | 1.92  | C56-C59  | 1.4315 |         |        |           |        |

**Table S7** Bond lengths between atoms in FcPMo optimized structure in aqueous phase

| Atoms   | Bond length (Å) | Atoms    | Bond length (Å) | Atoms    | Bond length (Å) | Atoms     | Bond length (Å) |
|---------|-----------------|----------|-----------------|----------|-----------------|-----------|-----------------|
| Mo1-O18 | 1.6804          | Mo8-O38  | 1.8544          | C56-H66  | 1.0843          | C84-H93   | 1.0856          |
| Mo1-O19 | 1.8735          | Mo8-O39  | 1.8576          | C57-C58  | 1.4283          | C85-H94   | 1.0868          |
| Mo1-O21 | 1.9799          | Mo8-O53  | 1.7064          | C57-H67  | 1.0863          | C96-Fe97  | 2.1113          |
| Mo1-O26 | 1.8977          | Mo9-O16  | 1.8731          | C58-C59  | 1.4243          | C96-C98   | 1.4234          |
| Mo1-O37 | 2.3819          | Mo9-O20  | 1.9576          | C58-H68  | 1.0869          | C96-C99   | 1.4294          |
| Mo1-O39 | 2.0029          | Mo9-O28  | 1.8972          | C59-H69  | 1.0866          | C96-H107  | 1.0868          |
| Mo2-O14 | 1.8594          | Mo9-O32  | 1.948           | C60-C61  | 1.4372          | Fe97-C98  | 2.1079          |
| Mo2-O20 | 1.8748          | Mo9-O42  | 2.4752          | C60-C64  | 1.4319          | Fe97-C99  | 2.0553          |
| Mo2-O22 | 2.4908          | Mo9-O44  | 1.6907          | C60-H70  | 1.0872          | Fe97-C100 | 2.0283          |
| Mo2-O25 | 1.9492          | Mo10-O14 | 2.0096          | C61-C62  | 1.4372          | Fe97-C101 | 2.0562          |
| Mo2-O38 | 2.0381          | Mo10-O22 | 2.4857          | C61-H71  | 1.0868          | Fe97-C102 | 2.0507          |
| Mo2-O48 | 1.6952          | Mo10-O24 | 1.964           | C62-C63  | 1.4284          | Fe97-C103 | 2.0604          |
| Mo3-O17 | 1.8711          | Mo10-O31 | 1.8645          | C62-H72  | 1.0862          | Fe97-C104 | 2.0908          |
| Mo3-O19 | 1.9818          | Mo10-O34 | 1.8673          | C63-C64  | 1.4248          | Fe97-C105 | 2.0901          |
| Mo3-O30 | 1.8987          | Mo10-O52 | 1.7001          | C63-H73  | 1.0855          | Fe97-C106 | 2.0657          |
| Mo3-O33 | 2.4196          | Mo11-O27 | 1.8651          | C64-H74  | 1.0862          | C98-C101  | 1.4302          |
| Mo3-O40 | 1.9939          | Mo11-O30 | 1.9582          | C75-Fe76 | 2.0529          | C98-H108  | 1.0863          |
| Mo3-O46 | 1.6839          | Mo11-O31 | 2.0286          | C75-C77  | 1.4369          | C99-C100  | 1.4372          |
| Mo4-O26 | 1.9435          | Mo11-O33 | 2.4677          | C75-C78  | 1.4331          | C99-H109  | 1.0856          |
| Mo4-O29 | 1.8532          | Mo11-O41 | 1.8538          | C75-H86  | 1.0871          | C100-C101 | 1.4375          |
| Mo4-O35 | 2.0281          | Mo11-O49 | 1.7015          | Fe76-C77 | 2.0363          | C100-H110 | 1.0866          |
| Mo4-O36 | 1.8651          | Mo12-O33 | 2.5073          | Fe76-C78 | 2.0948          | C101-H111 | 1.0856          |
| Mo4-O37 | 2.5092          | Mo12-O35 | 1.8564          | Fe76-C79 | 2.1049          | C102-C103 | 1.4366          |
| Mo4-O51 | 1.7035          | Mo12-O40 | 1.8758          | Fe76-C80 | 2.0628          | C102-C106 | 1.4337          |
| Mo5-O17 | 1.9793          | Mo12-O41 | 2.0147          | Fe76-C81 | 2.1014          | C102-H112 | 1.086           |
| Mo5-O21 | 1.8747          | Mo12-O45 | 1.6954          | Fe76-C82 | 2.0551          | C103-C104 | 1.4315          |
| Mo5-O22 | 2.4145          | Mo12-O47 | 1.9712          | Fe76-C83 | 2.0345          | C103-H113 | 1.0859          |
| Mo5-O25 | 1.8952          | P13-O22  | 1.5499          | Fe76-C84 | 2.0601          | C104-C105 | 1.4256          |
| Mo5-O34 | 2.003           | P13-O33  | 1.5498          | Fe76-C85 | 2.1015          | C104-H114 | 1.0862          |
| Mo5-O50 | 1.6807          | P13-O37  | 1.5524          | C77-C80  | 1.4364          | C105-C106 | 1.4292          |
| Mo6-O16 | 1.969           | P13-O42  | 1.5393          | C77-H87  | 1.0862          | C105-H115 | 1.0861          |
| Mo6-O23 | 1.8621          | C54-Fe55 | 2.0357          | C78-C79  | 1.4255          | C106-H116 | 1.087           |
| Mo6-O29 | 1.9947          | C54-C56  | 1.4378          | C78-H88  | 1.0859          | O117-H118 | 0.9693          |
| Mo6-O42 | 2.495           | C54-C57  | 1.4377          | C79-C80  | 1.4283          | O117-H119 | 0.9701          |
| Mo6-O43 | 1.6895          | C54-H65  | 1.0871          | C79-H89  | 1.0863          | O120-H121 | 0.9736          |
| Mo6-O47 | 1.8634          | Fe55-C56 | 2.0456          | C80-H90  | 1.0858          | O120-H122 | 0.9708          |
| Mo7-O15 | 1.6852          | Fe55-C57 | 2.0764          | C81-C82  | 1.4297          | O123-H124 | 0.9698          |
| Mo7-O23 | 1.9848          | Fe55-C58 | 2.12            | C81-C85  | 1.4236          | O123-H125 | 0.9701          |
| Mo7-O24 | 1.868           | Fe55-C59 | 2.0963          | C81-H95  | 1.0872          | O126-H127 | 0.9698          |
| Mo7-O27 | 1.9717          | Fe55-C60 | 2.0555          | C82-C83  | 1.437           | O126-H128 | 0.9713          |
| Mo7-O32 | 1.8889          | Fe55-C61 | 2.0376          | C82-H91  | 1.0864          | O129-H130 | 0.9715          |
| Mo7-O42 | 2.4498          | Fe55-C62 | 2.0659          | C83-C84  | 1.4367          | O129-H131 | 0.9748          |
| Mo8-O28 | 1.9321          | Fe55-C63 | 2.1075          | C83-H92  | 1.0866          | O132-H133 | 0.9709          |
| Mo8-O36 | 2.0508          | Fe55-C64 | 2.0986          | C84-C85  | 1.4311          | O132-H134 | 0.9718          |
| Mo8-O37 | 2.5086          | C56-C59  | 1.4321          |          |                 |           |                 |



**Table S8** Bond angles between atoms in FcPW optimized structure in aqueous phase

| Atoms      | Angle (deg.) | Atoms       | Angle (deg.) | Atoms        | Angle (deg.) | Atoms         | Angle (deg.) |
|------------|--------------|-------------|--------------|--------------|--------------|---------------|--------------|
| O18-W1-O19 | 105.19       | O24-W10-O52 | 102.98       | C54-C57-H67  | 126.63       | C81-C82-C83   | 108.1        |
| O18-W1-O21 | 105.51       | O31-W10-O34 | 91.26        | Fe55-C57-C58 | 71.96        | C81-C82-H91   | 124.67       |
| O18-W1-O26 | 96.08        | O31-W10-O52 | 101.68       | Fe55-C57-H67 | 124.37       | C83-C82-H91   | 127.19       |
| O18-W1-O37 | 163.26       | O34-W10-O52 | 102.35       | C58-C57-H67  | 125.27       | Fe76-C83-C82  | 70.23        |
| O18-W1-O39 | 95.76        | O27-W11-O30 | 155.77       | Fe55-C58-C57 | 68.25        | Fe76-C83-C84  | 70.39        |
| O19-W1-O21 | 85.35        | O27-W11-O31 | 83.88        | Fe55-C58-C59 | 69.56        | Fe76-C83-H92  | 124.06       |
| O19-W1-O26 | 92.77        | O27-W11-O33 | 84.75        | Fe55-C58-H68 | 124.52       | C82-C83-C84   | 107.63       |
| O19-W1-O37 | 87.84        | O27-W11-O41 | 91.64        | C57-C58-C59  | 108.2        | C82-C83-H92   | 126.37       |
| O19-W1-O39 | 158.97       | O27-W11-O49 | 103.26       | C57-C58-H68  | 126.11       | C84-C83-H92   | 125.99       |
| O21-W1-O26 | 158.07       | O30-W11-O31 | 86.82        | C59-C58-H68  | 125.55       | Fe76-C84-C83  | 68.51        |
| O21-W1-O37 | 85.67        | O30-W11-O33 | 71.92        | Fe55-C59-C56 | 67.72        | Fe76-C84-C85  | 71.47        |
| O21-W1-O39 | 87.29        | O30-W11-O41 | 87.84        | Fe55-C59-C58 | 71.07        | Fe76-C84-H93  | 125.26       |
| O26-W1-O37 | 72.42        | O30-W11-O49 | 100.52       | Fe55-C59-H69 | 123.63       | C83-C84-C85   | 107.78       |
| O26-W1-O39 | 86.77        | O31-W11-O33 | 83.05        | C56-C59-C58  | 108.29       | C83-C84-H93   | 125.92       |
| O37-W1-O39 | 71.95        | O31-W11-O41 | 156.05       | C56-C59-H69  | 126.5        | C85-C84-H93   | 126.3        |
| O14-W2-O20 | 90.2         | O31-W11-O49 | 101.7        | C58-C59-H69  | 125.07       | Fe76-C85-C81  | 70.3         |
| O14-W2-O22 | 71.31        | O33-W11-O41 | 73.11        | Fe55-C60-C61 | 68.78        | Fe76-C85-C84  | 68.29        |
| O14-W2-O25 | 87.91        | O33-W11-O49 | 171          | Fe55-C60-C64 | 71.57        | Fe76-C85-H94  | 125.31       |
| O14-W2-O38 | 155.1        | O41-W11-O49 | 102.22       | Fe55-C60-H70 | 123.28       | C81-C85-C84   | 108.38       |
| O14-W2-O48 | 103.8        | O35-W12-O40 | 89.99        | C61-C60-C64  | 107.82       | C81-C85-H94   | 125.05       |
| O20-W2-O22 | 84.41        | O35-W12-O41 | 153.33       | C61-C60-H70  | 125.52       | C84-C85-H94   | 126.53       |
| O20-W2-O25 | 154.2        | O35-W12-O45 | 101.28       | C64-C60-H70  | 126.62       | Fe97-C96-C98  | 69.69        |
| O20-W2-O38 | 83.97        | O35-W12-O47 | 84.81        | Fe55-C61-C60 | 70.16        | Fe97-C96-C99  | 67.95        |
| O20-W2-O48 | 102.3        | O40-W12-O41 | 87.51        | Fe55-C61-C62 | 70.54        | Fe97-C96-H107 | 125.27       |
| O22-W2-O25 | 70.58        | O40-W12-O45 | 103.11       | Fe55-C61-H71 | 124.68       | C98-C96-C99   | 108.11       |
| O22-W2-O38 | 83.99        | O40-W12-O47 | 154.21       | C60-C61-C62  | 107.77       | C98-C96-H107  | 126          |
| O22-W2-O48 | 171.9        | O41-W12-O45 | 105.14       | C60-C61-H71  | 125.43       | C99-C96-H107  | 125.8        |
| O25-W2-O38 | 86.96        | O41-W12-O47 | 85.99        | C62-C61-H71  | 126.81       | C96-Fe97-C98  | 39.19        |

|            |        |             |        |              |        |                |        |
|------------|--------|-------------|--------|--------------|--------|----------------|--------|
| O25-W2-O48 | 103.2  | O45-W12-O47 | 102.68 | Fe55-C62-C61 | 68.49  | C96-Fe97-C99   | 39.67  |
| O38-W2-O48 | 101.1  | O22-P13-O33 | 109.97 | Fe55-C62-C63 | 71.58  | C96-Fe97-C100  | 67.7   |
| O17-W3-O19 | 84.54  | O22-P13-O37 | 109.28 | Fe55-C62-H72 | 123.85 | C96-Fe97-C101  | 67.22  |
| O17-W3-O30 | 91.53  | O22-P13-O42 | 109.61 | C61-C62-C63  | 107.86 | C96-Fe97-C102  | 146.28 |
| O17-W3-O33 | 84.07  | O33-P13-O37 | 109.64 | C61-C62-H72  | 126.92 | C96-Fe97-C103  | 115.54 |
| O17-W3-O40 | 154.3  | O33-P13-O42 | 109.31 | C63-C62-H72  | 125.19 | C96-Fe97-C104  | 110.88 |
| O17-W3-O46 | 105.4  | O37-P13-O42 | 109.02 | Fe55-C63-C62 | 68.42  | C96-Fe97-C105  | 134.4  |
| O19-W3-O30 | 156.3  | W2-O14-W10  | 128.29 | Fe55-C63-C64 | 69.97  | C96-Fe97-C106  | 172.82 |
| O19-W3-O33 | 85.15  | W6-O16-W9   | 131.4  | Fe55-C63-H73 | 123.27 | C98-Fe97-C99   | 66.93  |
| O19-W3-O40 | 86.4   | W3-O17-W5   | 152.55 | C62-C63-C64  | 108.3  | C98-Fe97-C100  | 68     |
| O19-W3-O46 | 104.7  | W1-O19-W3   | 149.09 | C62-C63-H73  | 125.58 | C98-Fe97-C101  | 40.19  |
| O30-W3-O33 | 71.23  | W2-O20-W9   | 152.43 | C64-C63-H73  | 125.91 | C98-Fe97-C102  | 116.99 |
| O30-W3-O40 | 87.22  | W1-O21-W5   | 149.2  | Fe55-C64-C60 | 68.23  | C98-Fe97-C103  | 112.13 |
| O30-W3-O46 | 98.86  | W2-O22-W5   | 89.05  | Fe55-C64-C63 | 70.47  | C98-Fe97-C104  | 135.73 |
| O33-W3-O40 | 71.22  | W2-O22-W10  | 88.88  | Fe55-C64-H74 | 122.95 | C98-Fe97-C105  | 173.33 |
| O33-W3-O46 | 166.7  | W2-O22-P13  | 126.61 | C60-C64-C63  | 108.25 | C98-Fe97-C106  | 146.67 |
| O40-W3-O46 | 100.1  | W5-O22-W10  | 89.39  | C60-C64-H74  | 126.96 | C99-Fe97-C100  | 40.99  |
| O26-W4-O29 | 154.7  | W5-O22-P13  | 125.78 | C63-C64-H74  | 124.58 | C99-Fe97-C101  | 68.46  |
| O26-W4-O35 | 84.96  | W10-O22-P13 | 125.28 | Fe76-C75-C77 | 68.81  | C99-Fe97-C102  | 173.88 |
| O26-W4-O36 | 87.21  | W6-O23-W7   | 130.29 | Fe76-C75-C78 | 71.37  | C99-Fe97-C103  | 143.59 |
| O26-W4-O51 | 101.3  | W7-O24-W10  | 152.05 | Fe76-C75-H86 | 125.63 | C99-Fe97-C104  | 113.06 |
| O29-W4-O35 | 84.68  | W2-O25-W5   | 128.75 | C77-C75-C78  | 107.84 | C99-Fe97-C105  | 109.06 |
| O29-W4-O36 | 91.91  | W1-O26-W4   | 128    | C77-C75-H86  | 125.83 | C99-Fe97-C106  | 133.84 |
| O29-W4-O51 | 103.6  | W7-O27-W11  | 152.13 | C78-C75-H86  | 126.33 | C100-Fe97-C101 | 41.25  |
| O35-W4-O36 | 153.6  | W8-O28-W9   | 152    | C75-Fe76-C77 | 41.12  | C100-Fe97-C102 | 134.76 |
| O35-W4-O51 | 103    | W4-O29-W6   | 151.08 | C75-Fe76-C78 | 40.41  | C100-Fe97-C103 | 175.37 |
| O36-W4-O51 | 103.3  | W3-O30-W11  | 127.04 | C75-Fe76-C79 | 67.63  | C100-Fe97-C104 | 142.67 |
| O17-W5-O21 | 84.78  | W10-O31-W11 | 152.07 | C75-Fe76-C80 | 68.49  | C100-Fe97-C105 | 112.86 |
| O17-W5-O22 | 83.41  | W7-O32-W9   | 129.45 | C75-Fe76-C81 | 156.11 | C100-Fe97-C106 | 109.17 |
| O17-W5-O25 | 154.7  | W3-O33-W11  | 89.66  | C75-Fe76-C82 | 163.08 | C101-Fe97-C102 | 111.13 |
| O17-W5-O34 | 87.45  | W3-O33-P13  | 125.51 | C75-Fe76-C83 | 126.44 | C101-Fe97-C103 | 135.94 |
| O17-W5-O50 | 105.2  | W11-O33-P13 | 126.8  | C75-Fe76-C84 | 109.59 | C101-Fe97-C104 | 175.32 |
| O21-W5-O22 | 85.4   | W5-O34-W10  | 127.5  | C75-Fe76-C85 | 122.79 | C101-Fe97-C105 | 144.5  |
| O21-W5-O25 | 90.44  | W4-O35-W12  | 153.32 | C77-Fe76-C78 | 68.29  | C101-Fe97-C106 | 115.09 |
| O21-W5-O34 | 156.32 | W4-O36-W8   | 127.23 | C77-Fe76-C79 | 68.05  | C102-Fe97-C103 | 40.76  |
| O21-W5-O50 | 104.13 | W1-O37-P13  | 126.09 | C77-Fe76-C80 | 40.95  | C102-Fe97-C104 | 67.87  |
| O22-W5-O25 | 71.43  | W2-O38-W8   | 151.02 | C77-Fe76-C81 | 161.58 | C102-Fe97-C105 | 67.49  |
| O22-W5-O34 | 71.48  | W1-O39-W8   | 127.89 | C77-Fe76-C82 | 124.05 | C102-Fe97-C106 | 40.35  |
| O22-W5-O50 | 167.52 | W3-O40-W12  | 128.96 | C77-Fe76-C83 | 105.86 | C103-Fe97-C104 | 40.4   |
| O25-W5-O34 | 87.09  | W11-O41-W12 | 127.21 | C77-Fe76-C84 | 120.15 | C103-Fe97-C105 | 67.59  |
| O25-W5-O50 | 100.08 | W7-O42-W9   | 88.64  | C77-Fe76-C85 | 156.21 | C103-Fe97-C106 | 68.01  |
| O34-W5-O50 | 99.49  | W7-O42-P13  | 125.44 | C78-Fe76-C79 | 39.65  | C104-Fe97-C105 | 39.85  |

|            |        |              |        |              |        |                |        |
|------------|--------|--------------|--------|--------------|--------|----------------|--------|
| O16-W6-O23 | 87.8   | W9-O42-P13   | 125.8  | C78-Fe76-C80 | 67.45  | C104-Fe97-C106 | 67.35  |
| O16-W6-O29 | 82.26  | W6-O47-W12   | 151.46 | C78-Fe76-C81 | 121.59 | C105-Fe97-C106 | 39.9   |
| O16-W6-O43 | 103.11 | Fe55-C54-C56 | 69.83  | C78-Fe76-C82 | 153.4  | C96-C98-Fe97   | 71.12  |
| O16-W6-O47 | 151.82 | Fe55-C54-C57 | 70.98  | C78-Fe76-C83 | 165.22 | C96-C98-C101   | 108.42 |
| O23-W6-O29 | 154.73 | Fe55-C54-H65 | 124.01 | C78-Fe76-C84 | 128.96 | C96-C98-H108   | 125.31 |
| O23-W6-O43 | 102.14 | C56-C54-C57  | 107.51 | C78-Fe76-C85 | 111.38 | Fe97-C98-C101  | 67.59  |
| O23-W6-O47 | 93.02  | C56-C54-H65  | 125.89 | C79-Fe76-C80 | 40.02  | Fe97-C98-H108  | 124.24 |
| O29-W6-O43 | 102.72 | C57-C54-H65  | 126.6  | C79-Fe76-C81 | 108.67 | C101-C98-H108  | 126.17 |
| O29-W6-O47 | 85.22  | C54-Fe55-C56 | 41.25  | C79-Fe76-C82 | 118.45 | C96-C99-Fe97   | 72.38  |
| O43-W6-O47 | 104.23 | C54-Fe55-C57 | 40.97  | C79-Fe76-C83 | 152.4  | C96-C99-C100   | 108.13 |
| O15-W7-O23 | 104.34 | C54-Fe55-C58 | 67.82  | C79-Fe76-C84 | 165.24 | C96-C99-H109   | 125.33 |
| O15-W7-O24 | 101.56 | C54-Fe55-C59 | 68.19  | C79-Fe76-C85 | 127.96 | Fe97-C99-C100  | 67.91  |
| O15-W7-O27 | 102.61 | C54-Fe55-C60 | 122.04 | C80-Fe76-C81 | 124.92 | Fe97-C99-H109  | 125.26 |
| O15-W7-O32 | 103.56 | C54-Fe55-C61 | 107.24 | C80-Fe76-C82 | 105.33 | C100-C99-H109  | 126.53 |
| O15-W7-O42 | 172.36 | C54-Fe55-C62 | 124.11 | C80-Fe76-C83 | 117.69 | Fe97-C100-C99  | 71.1   |
| O23-W7-O24 | 154.04 | C54-Fe55-C63 | 160.65 | C80-Fe76-C84 | 153.98 | Fe97-C100-C101 | 70.16  |
| O23-W7-O27 | 86.47  | C54-Fe55-C64 | 157.91 | C80-Fe76-C85 | 162.58 | Fe97-C100-H110 | 124.35 |
| O23-W7-O32 | 84.82  | C56-Fe55-C57 | 68.5   | C81-Fe76-C82 | 40.16  | C99-C100-C101  | 107.61 |
| O23-W7-O42 | 70.32  | C56-Fe55-C58 | 67.39  | C81-Fe76-C83 | 68.17  | C99-C100-H110  | 125.92 |
| O24-W7-O27 | 86.18  | C56-Fe55-C59 | 40.33  | C81-Fe76-C84 | 67.6   | C101-C100-H110 | 126.47 |
| O24-W7-O32 | 90.92  | C56-Fe55-C60 | 106.27 | C81-Fe76-C85 | 39.59  | Fe97-C101-C98  | 72.21  |
| O24-W7-O42 | 84.07  | C56-Fe55-C61 | 122.68 | C82-Fe76-C83 | 41.14  | Fe97-C101-C100 | 68.59  |
| O27-W7-O32 | 153.73 | C56-Fe55-C62 | 160.24 | C82-Fe76-C84 | 68.64  | Fe97-C101-H111 | 124.63 |
| O27-W7-O42 | 82.79  | C56-Fe55-C63 | 157.34 | C82-Fe76-C85 | 67.5   | C98-C101-C100  | 107.73 |
| O32-W7-O42 | 70.94  | C56-Fe55-C64 | 121.71 | C83-Fe76-C84 | 41.1   | C98-C101-H111  | 125.91 |
| O28-W8-O36 | 86.92  | C57-Fe55-C58 | 39.79  | C83-Fe76-C85 | 68.15  | C100-C101-H111 | 126.36 |
| O28-W8-O38 | 84.63  | C57-Fe55-C59 | 67.17  | C84-Fe76-C85 | 40.24  | Fe97-C102-C103 | 69.49  |
| O28-W8-O39 | 153.71 | C57-Fe55-C60 | 159.42 | C75-C77-Fe76 | 70.06  | Fe97-C102-C106 | 70.59  |
| O28-W8-O53 | 104.11 | C57-Fe55-C61 | 123.76 | C75-C77-C80  | 107.59 | Fe97-C102-H112 | 126.32 |
| O36-W8-O38 | 156.46 | C57-Fe55-C62 | 109.3  | C75-C77-H87  | 125.99 | C103-C102-C106 | 107.9  |
| O36-W8-O39 | 87.2   | C57-Fe55-C63 | 124.92 | Fe76-C77-C80 | 70.54  | C103-C102-H112 | 126.04 |
| O36-W8-O53 | 100.86 | C57-Fe55-C64 | 159.52 | Fe76-C77-H87 | 124.18 | C106-C102-H112 | 126.05 |
| O38-W8-O39 | 90.71  | C58-Fe55-C59 | 39.37  | C80-C77-H87  | 126.41 | Fe97-C103-C102 | 69.75  |
| O38-W8-O53 | 102.49 | C58-Fe55-C60 | 158.33 | C75-C78-Fe76 | 68.22  | Fe97-C103-C104 | 70.84  |
| O39-W8-O53 | 102.16 | C58-Fe55-C61 | 159.87 | C75-C78-C79  | 108.19 | Fe97-C103-H113 | 125.75 |
| O16-W9-O20 | 152.65 | C58-Fe55-C62 | 124.35 | C75-C78-H88  | 126.53 | C102-C103-C104 | 107.78 |
| O16-W9-O28 | 85.85  | C58-Fe55-C63 | 109.92 | Fe76-C78-C79 | 70.57  | C102-C103-H113 | 126.51 |
| O16-W9-O32 | 87.85  | C58-Fe55-C64 | 123.97 | Fe76-C78-H88 | 125.43 | C104-C103-H113 | 125.7  |
| O16-W9-O42 | 68.71  | C59-Fe55-C60 | 122.53 | C79-C78-H88  | 125.25 | Fe97-C104-C103 | 68.76  |
| O16-W9-O44 | 102.92 | C59-Fe55-C61 | 158.92 | Fe76-C79-C78 | 69.79  | Fe97-C104-C105 | 70.53  |
| O20-W9-O28 | 84.88  | C59-Fe55-C62 | 158.53 | Fe76-C79-C80 | 68.41  | Fe97-C104-H114 | 123.52 |
| O20-W9-O32 | 89.75  | C59-Fe55-C63 | 123.17 | Fe76-C79-H89 | 124.76 | C103-C104-C105 | 108.04 |

|             |        |              |        |              |        |                |        |
|-------------|--------|--------------|--------|--------------|--------|----------------|--------|
| O20-W9-O42  | 84.77  | C59-Fe55-C64 | 108.03 | C78-C79-C80  | 108.15 | C103-C104-H114 | 126.17 |
| O20-W9-O44  | 104.15 | C60-Fe55-C61 | 41.06  | C78-C79-H89  | 126.09 | C105-C104-H114 | 125.69 |
| O28-W9-O32  | 154.94 | C60-Fe55-C62 | 68.51  | C80-C79-H89  | 125.67 | Fe97-C105-C104 | 69.62  |
| O28-W9-O42  | 84.15  | C60-Fe55-C63 | 67.45  | Fe76-C80-C77 | 68.51  | Fe97-C105-C106 | 69.45  |
| O28-W9-O44  | 101.94 | C60-Fe55-C64 | 40.2   | Fe76-C80-C79 | 71.57  | Fe97-C105-H115 | 122.58 |
| O32-W9-O42  | 70.97  | C61-Fe55-C62 | 40.97  | Fe76-C80-H90 | 123.66 | C104-C105-C106 | 108.25 |
| O32-W9-O44  | 103.11 | C61-Fe55-C63 | 67.87  | C77-C80-C79  | 108.22 | C104-C105-H115 | 125.42 |
| O42-W9-O44  | 169.51 | C61-Fe55-C64 | 68.02  | C77-C80-H90  | 126.49 | C106-C105-H115 | 126.13 |
| O14-W10-O22 | 71.36  | C62-Fe55-C63 | 40     | C79-C80-H90  | 125.24 | Fe97-C106-C102 | 69.06  |
| O14-W10-O24 | 86.62  | C62-Fe55-C64 | 67.4   | Fe76-C81-C82 | 68.09  | Fe97-C106-C105 | 70.65  |
| O14-W10-O31 | 154.85 | C63-Fe55-C64 | 39.56  | Fe76-C81-C85 | 70.11  | Fe97-C106-H116 | 123.03 |
| O14-W10-O34 | 87.08  | C54-C56-Fe55 | 68.92  | Fe76-C81-H95 | 124.88 | C102-C106-C105 | 108.03 |
| O14-W10-O52 | 103.19 | C54-C56-C59  | 107.92 | C82-C81-C85  | 108.11 | C102-C106-H116 | 125.76 |
| O22-W10-O24 | 83.18  | C54-C56-H66  | 125.68 | C82-C81-H95  | 125.89 | C105-C106-H116 | 126.11 |
| O22-W10-O31 | 84.3   | Fe55-C56-C59 | 71.95  | C85-C81-H95  | 125.92 | H118-O117-H119 | 104.75 |
| O22-W10-O34 | 71.55  | Fe55-C56-H66 | 121.71 | Fe76-C82-C81 | 71.75  | H121-O120-H122 | 103.9  |
| O22-W10-O52 | 171.72 | C59-C56-H66  | 126.29 | Fe76-C82-C83 | 68.63  | H124-O123-H125 | 104.37 |
| O24-W10-O31 | 84.23  | C54-C57-Fe55 | 68.05  | Fe76-C82-H91 | 123.41 | H127-O126-H128 | 104.35 |
| O24-W10-O34 | 154.66 | C54-C57-C58  | 108.08 |              |        |                |        |

**Table S9** Bond angles between atoms in FcPMo optimized structure in aqueous phase

| Atoms       | Angle (deg.) | Atoms        | Angle (deg.) | Atoms        | Angle (deg.) | Atoms         | Angle (deg.) |
|-------------|--------------|--------------|--------------|--------------|--------------|---------------|--------------|
| O18-Mo1-O19 | 106.4        | O14-Mo10-O52 | 101.5        | C60-Fe55-C64 | 40.31        | C82-C81-C85   | 108.1        |
| O18-Mo1-O21 | 104.9        | O22-Mo10-O24 | 81.92        | C61-Fe55-C62 | 41           | C82-C81-H95   | 125.8        |
| O18-Mo1-O26 | 96.41        | O22-Mo10-O31 | 85.91        | C61-Fe55-C63 | 67.97        | C85-C81-H95   | 126          |
| O18-Mo1-O37 | 163.4        | O22-Mo10-O34 | 71.66        | C61-Fe55-C64 | 68.14        | Fe76-C82-C81  | 71.64        |
| O18-Mo1-O39 | 94.65        | O22-Mo10-O52 | 170.8        | C62-Fe55-C63 | 40.01        | Fe76-C82-C83  | 68.66        |
| O19-Mo1-O21 | 84.77        | O24-Mo10-O31 | 84.8         | C62-Fe55-C64 | 67.43        | Fe76-C82-H91  | 123.6        |
| O19-Mo1-O26 | 95.45        | O24-Mo10-O34 | 153.5        | C63-Fe55-C64 | 39.6         | C81-C82-C83   | 108          |
| O19-Mo1-O37 | 88.15        | O24-Mo10-O52 | 102.3        | C54-C56-Fe55 | 69           | C81-C82-H91   | 124.8        |
| O19-Mo1-O39 | 158.2        | O31-Mo10-O34 | 95.72        | C54-C56-C59  | 107.8        | C83-C82-H91   | 127.2        |
| O21-Mo1-O26 | 157.7        | O31-Mo10-O52 | 102.6        | C54-C56-H66  | 125.9        | Fe76-C83-C82  | 70.2         |
| O21-Mo1-O37 | 83.81        | O34-Mo10-O52 | 103.5        | Fe55-C56-C59 | 71.68        | Fe76-C83-C84  | 70.42        |
| O21-Mo1-O39 | 84.62        | O27-Mo11-O30 | 154.1        | Fe55-C56-H66 | 121.9        | Fe76-C83-H92  | 124.2        |
| O26-Mo1-O37 | 73.93        | O27-Mo11-O31 | 82.62        | C59-C56-H66  | 126.1        | C82-C83-C84   | 107.7        |
| O26-Mo1-O39 | 87.34        | O27-Mo11-O33 | 85.86        | C54-C57-Fe55 | 68.02        | C82-C83-H92   | 126.3        |
| O37-Mo1-O39 | 71.85        | O27-Mo11-O41 | 96.18        | C54-C57-C58  | 108.1        | C84-C83-H92   | 126          |
| O14-Mo2-O20 | 95.33        | O27-Mo11-O49 | 103.4        | C54-C57-H67  | 126.6        | Fe76-C84-C83  | 68.51        |
| O14-Mo2-O22 | 72.7         | O30-Mo11-O31 | 82.8         | Fe55-C57-C58 | 71.76        | Fe76-C84-C85  | 71.45        |
| O14-Mo2-O25 | 88.47        | O30-Mo11-O33 | 70.97        | Fe55-C57-H67 | 124.8        | Fe76-C84-H93  | 125.1        |
| O14-Mo2-O38 | 155.4        | O30-Mo11-O41 | 88.31        | C58-C57-H67  | 125.3        | C83-C84-C85   | 107.8        |
| O14-Mo2-O48 | 104.5        | O30-Mo11-O49 | 100.3        | Fe55-C58-C57 | 68.47        | C83-C84-H93   | 125.9        |
| O20-Mo2-O22 | 84.97        | O31-Mo11-O33 | 82.05        | Fe55-C58-C59 | 69.36        | C85-C84-H93   | 126.3        |
| O20-Mo2-O25 | 152.8        | O31-Mo11-O41 | 155.3        | Fe55-C58-H68 | 124.4        | Fe76-C85-C81  | 70.2         |
| O20-Mo2-O38 | 82.7         | O31-Mo11-O49 | 100.7        | C57-C58-C59  | 108.2        | Fe76-C85-C84  | 68.34        |
| O20-Mo2-O48 | 103.4        | O33-Mo11-O41 | 73.29        | C57-C58-H68  | 126.3        | Fe76-C85-H94  | 125.5        |
| O22-Mo2-O25 | 70.47        | O33-Mo11-O49 | 170.6        | C59-C58-H68  | 125.4        | C81-C85-C84   | 108.4        |
| O22-Mo2-O38 | 82.66        | O41-Mo11-O49 | 103.6        | Fe55-C59-C56 | 67.88        | C81-C85-H94   | 125.2        |
| O22-Mo2-O48 | 171.5        | O33-Mo12-O35 | 86.08        | Fe55-C59-C58 | 71.16        | C84-C85-H94   | 126.4        |
| O25-Mo2-O38 | 82.78        | O33-Mo12-O40 | 71.14        | Fe55-C59-H69 | 123.6        | Fe97-C96-C98  | 70.16        |
| O25-Mo2-O48 | 101.7        | O33-Mo12-O41 | 70.03        | C56-C59-C58  | 108.3        | Fe97-C96-C99  | 67.84        |
| O38-Mo2-O48 | 99.8         | O33-Mo12-O45 | 170.5        | C56-C59-H69  | 126.4        | Fe97-C96-H107 | 125.3        |
| O17-Mo3-O19 | 84.39        | O33-Mo12-O47 | 82.28        | C58-C59-H69  | 125.2        | C98-C96-C99   | 108.1        |
| O17-Mo3-O30 | 94.67        | O35-Mo12-O40 | 96.02        | Fe55-C60-C61 | 68.77        | C98-C96-H107  | 126          |
| O17-Mo3-O33 | 85.54        | O35-Mo12-O41 | 154.3        | Fe55-C60-C64 | 71.47        | C99-C96-H107  | 125.9        |
| O17-Mo3-O40 | 155.3        | O35-Mo12-O45 | 102.4        | Fe55-C60-H70 | 123.2        | C96-Fe97-C98  | 39.43        |
| O17-Mo3-O46 | 105.4        | O35-Mo12-O47 | 85.46        | C61-C60-C64  | 107.8        | C96-Fe97-C99  | 40.1         |
| O19-Mo3-O30 | 155.6        | O40-Mo12-O41 | 85.28        | C61-C60-H70  | 125.6        | C96-Fe97-C100 | 68.13        |
| O19-Mo3-O33 | 82.66        | O40-Mo12-O45 | 103.2        | C64-C60-H70  | 126.6        | C96-Fe97-C101 | 67.5         |
| O19-Mo3-O40 | 83.85        | O40-Mo12-O47 | 153.2        | Fe55-C61-C60 | 70.12        | C96-Fe97-C102 | 145.6        |
| O19-Mo3-O46 | 104.3        | O41-Mo12-O45 | 102.3        | Fe55-C61-C62 | 70.56        | C96-Fe97-C103 | 115          |
| O30-Mo3-O33 | 72.99        | O41-Mo12-O47 | 82.25        | Fe55-C61-H71 | 124.5        | C96-Fe97-C104 | 110.6        |

|             |       |               |       |              |       |                |       |
|-------------|-------|---------------|-------|--------------|-------|----------------|-------|
| O30-Mo3-O40 | 87.28 | O45-Mo12-O47  | 102.6 | C60-C61-C62  | 107.7 | C96-Fe97-C105  | 134.3 |
| O30-Mo3-O46 | 99.43 | O22-P13-O33   | 110.1 | C60-C61-H71  | 125.6 | C96-Fe97-C106  | 173.1 |
| O33-Mo3-O40 | 71.47 | O22-P13-O37   | 109.5 | C62-C61-H71  | 126.7 | C98-Fe97-C99   | 67.36 |
| O33-Mo3-O46 | 167.4 | O22-P13-O42   | 109.2 | Fe55-C62-C61 | 68.44 | C98-Fe97-C100  | 68.08 |
| O40-Mo3-O46 | 98.5  | O33-P13-O37   | 109.6 | Fe55-C62-C63 | 71.56 | C98-Fe97-C101  | 40.15 |
| O26-Mo4-O29 | 152.4 | O33-P13-O42   | 109   | Fe55-C62-H72 | 123.9 | C98-Fe97-C102  | 116.2 |
| O26-Mo4-O35 | 81.88 | O37-P13-O42   | 109.4 | C61-C62-C63  | 108   | C98-Fe97-C103  | 111.6 |
| O26-Mo4-O36 | 88.52 | Mo2-O14-Mo10  | 127.9 | C61-C62-H72  | 126.8 | C98-Fe97-C104  | 135.5 |
| O26-Mo4-O37 | 70.22 | Mo6-O16-Mo9   | 131.8 | C63-C62-H72  | 125.2 | C98-Fe97-C105  | 173.4 |
| O26-Mo4-O51 | 101.4 | Mo3-O17-Mo5   | 152.2 | Fe55-C63-C62 | 68.43 | C98-Fe97-C106  | 146.2 |
| O29-Mo4-O35 | 81.99 | Mo1-O19-Mo3   | 150.2 | Fe55-C63-C64 | 69.86 | C99-Fe97-C100  | 41.21 |
| O29-Mo4-O36 | 96.64 | Mo2-O20-Mo9   | 154.2 | Fe55-C63-H73 | 123.6 | C99-Fe97-C101  | 68.72 |
| O29-Mo4-O37 | 85.46 | Mo1-O21-Mo5   | 150.4 | C62-C63-C64  | 108.2 | C99-Fe97-C102  | 174   |
| O29-Mo4-O51 | 103.6 | Mo2-O22-Mo5   | 89.13 | C62-C63-H73  | 125.7 | C99-Fe97-C103  | 143.6 |
| O35-Mo4-O36 | 154.5 | Mo2-O22-Mo10  | 88.63 | C64-C63-H73  | 125.9 | C99-Fe97-C104  | 113.2 |
| O35-Mo4-O37 | 81.74 | Mo2-O22-P13   | 126.6 | Fe55-C64-C60 | 68.23 | C99-Fe97-C105  | 109   |
| O35-Mo4-O51 | 101.4 | Mo5-O22-Mo10  | 89.96 | Fe55-C64-C63 | 70.54 | C99-Fe97-C106  | 133.7 |
| O36-Mo4-O37 | 72.74 | Mo5-O22-P13   | 125.8 | Fe55-C64-H74 | 123.2 | C100-Fe97-C101 | 41.21 |
| O36-Mo4-O51 | 103.7 | Mo10-O22-P13  | 125   | C60-C64-C63  | 108.3 | C100-Fe97-C102 | 134.4 |
| O37-Mo4-O51 | 170.7 | Mo6-O23-Mo7   | 128.8 | C60-C64-H74  | 126.9 | C100-Fe97-C103 | 175.1 |
| O17-Mo5-O21 | 84.49 | Mo7-O24-Mo10  | 151.3 | C63-C64-H74  | 124.6 | C100-Fe97-C104 | 143.3 |
| O17-Mo5-O22 | 82.3  | Mo2-O25-Mo5   | 127.1 | Fe76-C75-C77 | 68.81 | C100-Fe97-C105 | 113.2 |
| O17-Mo5-O25 | 155.3 | Mo1-O26-Mo4   | 126.6 | Fe76-C75-C78 | 71.36 | C100-Fe97-C106 | 109   |
| O17-Mo5-O34 | 83.93 | Mo7-O27-Mo11  | 152.9 | Fe76-C75-H86 | 125.7 | C101-Fe97-C102 | 110.5 |
| O17-Mo5-O50 | 103.3 | Mo8-O28-Mo9   | 151.4 | C77-C75-C78  | 107.9 | C101-Fe97-C103 | 135.5 |
| O21-Mo5-O22 | 86.23 | Mo4-O29-Mo6   | 154.1 | C77-C75-H86  | 125.8 | C101-Fe97-C104 | 174.9 |
| O21-Mo5-O25 | 95.04 | Mo3-O30-Mo11  | 126.3 | C78-C75-H86  | 126.3 | C101-Fe97-C105 | 144.8 |
| O21-Mo5-O34 | 155.9 | Mo10-O31-Mo11 | 152.3 | C75-Fe76-C77 | 41.14 | C101-Fe97-C106 | 114.8 |
| O21-Mo5-O50 | 105.3 | Mo7-O32-Mo9   | 128.4 | C75-Fe76-C78 | 40.41 | C102-Fe97-C103 | 40.91 |
| O22-Mo5-O25 | 73.08 | Mo3-O33-Mo11  | 89.5  | C75-Fe76-C79 | 67.67 | C102-Fe97-C104 | 68.1  |
| O22-Mo5-O34 | 71.33 | Mo3-O33-Mo12  | 89.66 | C75-Fe76-C80 | 68.55 | C102-Fe97-C105 | 67.98 |
| O22-Mo5-O50 | 167.6 | Mo3-O33-P13   | 126   | C75-Fe76-C81 | 155.9 | C102-Fe97-C106 | 40.76 |
| O25-Mo5-O34 | 86.9  | Mo11-O33-Mo12 | 88.68 | C75-Fe76-C82 | 163.2 | C103-Fe97-C104 | 40.34 |
| O25-Mo5-O50 | 100.7 | Mo11-O33-P13  | 125.8 | C75-Fe76-C83 | 126.5 | C103-Fe97-C105 | 67.71 |
| O34-Mo5-O50 | 97.94 | Mo12-O33-P13  | 125.5 | C75-Fe76-C84 | 109.6 | C103-Fe97-C106 | 68.38 |
| O16-Mo6-O23 | 87.31 | Mo5-O34-Mo10  | 127   | C75-Fe76-C85 | 122.6 | C104-Fe97-C105 | 39.87 |
| O16-Mo6-O29 | 80.63 | Mo4-O35-Mo12  | 152.2 | C77-Fe76-C78 | 68.34 | C104-Fe97-C106 | 67.67 |
| O16-Mo6-O42 | 68    | Mo4-O36-Mo8   | 128   | C77-Fe76-C79 | 68.13 | C105-Fe97-C106 | 40.23 |
| O16-Mo6-O43 | 102.9 | Mo1-O37-Mo4   | 89.06 | C77-Fe76-C80 | 41.02 | C96-C98-Fe97   | 70.41 |
| O16-Mo6-O47 | 151.6 | Mo1-O37-Mo8   | 89.96 | C77-Fe76-C81 | 161.8 | C96-C98-C101   | 108.5 |
| O23-Mo6-O29 | 154.2 | Mo1-O37-P13   | 125.3 | C77-Fe76-C82 | 124.2 | C96-C98-H108   | 125.4 |
| O23-Mo6-O42 | 71.41 | Mo4-O37-Mo8   | 89.1  | C77-Fe76-C83 | 106.1 | Fe97-C98-C101  | 67.98 |
| O23-Mo6-O43 | 103.8 | Mo4-O37-P13   | 126.4 | C77-Fe76-C84 | 120.3 | Fe97-C98-H108  | 124.6 |

|             |       |               |       |              |       |                |       |
|-------------|-------|---------------|-------|--------------|-------|----------------|-------|
| O23-Mo6-O47 | 96.23 | Mo8-O37-P13   | 125.5 | C77-Fe76-C85 | 156.2 | C101-C98-H108  | 126   |
| O29-Mo6-O42 | 82.95 | Mo2-O38-Mo8   | 150.2 | C78-Fe76-C79 | 39.68 | C96-C99-Fe97   | 72.06 |
| O29-Mo6-O43 | 101.1 | Mo1-O39-Mo8   | 127.2 | C78-Fe76-C80 | 67.53 | C96-C99-C100   | 108   |
| O29-Mo6-O47 | 84.34 | Mo3-O40-Mo12  | 127.7 | C78-Fe76-C81 | 121.4 | C96-C99-H109   | 125.3 |
| O42-Mo6-O43 | 169.5 | Mo11-O41-Mo12 | 128   | C78-Fe76-C82 | 153.4 | Fe97-C99-C100  | 68.39 |
| O42-Mo6-O47 | 86.37 | Mo6-O42-Mo7   | 89.1  | C78-Fe76-C83 | 165.2 | Fe97-C99-H109  | 124.5 |
| O43-Mo6-O47 | 103.6 | Mo6-O42-Mo9   | 89.76 | C78-Fe76-C84 | 128.8 | C100-C99-H109  | 126.6 |
| O15-Mo7-O23 | 101.7 | Mo6-O42-P13   | 125.4 | C78-Fe76-C85 | 111.1 | Fe97-C100-C99  | 70.4  |
| O15-Mo7-O24 | 102.6 | Mo7-O42-Mo9   | 89.08 | C79-Fe76-C80 | 40.07 | Fe97-C100-C101 | 70.44 |
| O15-Mo7-O27 | 101.2 | Mo7-O42-P13   | 126.8 | C79-Fe76-C81 | 108.5 | Fe97-C100-H110 | 124.1 |
| O15-Mo7-O32 | 104.3 | Mo9-O42-P13   | 125   | C79-Fe76-C82 | 118.5 | C99-C100-C101  | 107.7 |
| O15-Mo7-O42 | 171.6 | Mo6-O47-Mo12  | 150.9 | C79-Fe76-C83 | 152.6 | C99-C100-H110  | 126   |
| O23-Mo7-O24 | 155   | Fe55-C54-C56  | 69.75 | C79-Fe76-C84 | 165   | C101-C100-H110 | 126.4 |
| O23-Mo7-O27 | 83.75 | Fe55-C54-C57  | 71.06 | C79-Fe76-C85 | 127.7 | Fe97-C101-C98  | 71.87 |
| O23-Mo7-O32 | 85.22 | Fe55-C54-H65  | 124.1 | C80-Fe76-C81 | 124.9 | Fe97-C101-C100 | 68.36 |
| O23-Mo7-O42 | 70.72 | C56-C54-C57   | 107.6 | C80-Fe76-C82 | 105.4 | Fe97-C101-H111 | 124.6 |
| O24-Mo7-O27 | 85.84 | C56-C54-H65   | 125.9 | C80-Fe76-C83 | 117.9 | C98-C101-C100  | 107.7 |
| O24-Mo7-O32 | 94.41 | C57-C54-H65   | 126.6 | C80-Fe76-C84 | 154.2 | C98-C101-H111  | 125.9 |
| O24-Mo7-O42 | 85.34 | C54-Fe55-C56  | 41.25 | C80-Fe76-C85 | 162.5 | C100-C101-H111 | 126.4 |
| O27-Mo7-O32 | 153.8 | C54-Fe55-C57  | 40.91 | C81-Fe76-C82 | 40.22 | Fe97-C102-C103 | 69.91 |
| O27-Mo7-O42 | 81.91 | C54-Fe55-C58  | 67.84 | C81-Fe76-C83 | 68.2  | Fe97-C102-C106 | 70.18 |
| O32-Mo7-O42 | 71.98 | C54-Fe55-C59  | 68.28 | C81-Fe76-C84 | 67.6  | Fe97-C102-H112 | 125.4 |
| O28-Mo8-O36 | 82.5  | C54-Fe55-C60  | 121.9 | C81-Fe76-C85 | 39.6  | C103-C102-C106 | 107.8 |
| O28-Mo8-O37 | 81.67 | C54-Fe55-C61  | 107.1 | C82-Fe76-C83 | 41.14 | C103-C102-H112 | 126.2 |
| O28-Mo8-O38 | 86.26 | C54-Fe55-C62  | 124.1 | C82-Fe76-C84 | 68.64 | C106-C102-H112 | 126.1 |
| O28-Mo8-O39 | 152.4 | C54-Fe55-C63  | 160.6 | C82-Fe76-C85 | 67.52 | Fe97-C103-C102 | 69.18 |
| O28-Mo8-O53 | 103   | C54-Fe55-C64  | 157.9 | C83-Fe76-C84 | 41.08 | Fe97-C103-C104 | 70.97 |
| O36-Mo8-O37 | 70.1  | C56-Fe55-C57  | 68.49 | C83-Fe76-C85 | 68.12 | Fe97-C103-H113 | 124.7 |
| O36-Mo8-O38 | 155.5 | C56-Fe55-C58  | 67.51 | C84-Fe76-C85 | 40.21 | C102-C103-C104 | 107.9 |
| O36-Mo8-O39 | 84.72 | C56-Fe55-C59  | 40.43 | C75-C77-Fe76 | 70.05 | C102-C103-H113 | 126.4 |
| O36-Mo8-O53 | 100   | C56-Fe55-C60  | 106.2 | C75-C77-C80  | 107.6 | C104-C103-H113 | 125.7 |
| O37-Mo8-O38 | 86.8  | C56-Fe55-C61  | 122.6 | C75-C77-H87  | 126   | Fe97-C104-C103 | 68.69 |
| O37-Mo8-O39 | 71.02 | C56-Fe55-C62  | 160.2 | Fe76-C77-C80 | 70.48 | Fe97-C104-C105 | 70.04 |
| O37-Mo8-O53 | 168.7 | C56-Fe55-C63  | 157.4 | Fe76-C77-H87 | 124.3 | Fe97-C104-H114 | 123.5 |
| O38-Mo8-O39 | 95.68 | C56-Fe55-C64  | 121.7 | C80-C77-H87  | 126.4 | C103-C104-C105 | 108.1 |
| O38-Mo8-O53 | 103.7 | C57-Fe55-C58  | 39.78 | C75-C78-Fe76 | 68.22 | C103-C104-H114 | 126.1 |
| O39-Mo8-O53 | 103.3 | C57-Fe55-C59  | 67.24 | C75-C78-C79  | 108.2 | C105-C104-H114 | 125.7 |
| O16-Mo9-O20 | 152.6 | C57-Fe55-C60  | 159.3 | C75-C78-H88  | 126.5 | Fe97-C105-C104 | 70.09 |
| O16-Mo9-O28 | 91.21 | C57-Fe55-C61  | 123.6 | Fe76-C78-C79 | 70.54 | Fe97-C105-C106 | 68.97 |
| O16-Mo9-O32 | 87.86 | C57-Fe55-C62  | 109.3 | Fe76-C78-H88 | 125.4 | Fe97-C105-H115 | 123.3 |
| O16-Mo9-O42 | 69.72 | C57-Fe55-C63  | 125   | C79-C78-H88  | 125.3 | C104-C105-C106 | 108.3 |
| O16-Mo9-O44 | 104.4 | C57-Fe55-C64  | 159.6 | Fe76-C79-C78 | 69.78 | C104-C105-H115 | 125.7 |
| O20-Mo9-O28 | 84.16 | C58-Fe55-C59  | 39.48 | Fe76-C79-C80 | 68.38 | C106-C105-H115 | 125.9 |

|              |       |              |       |              |       |                |       |
|--------------|-------|--------------|-------|--------------|-------|----------------|-------|
| O20-Mo9-O32  | 85.64 | C58-Fe55-C60 | 158.5 | Fe76-C79-H89 | 124.6 | Fe97-C106-C102 | 69.06 |
| O20-Mo9-O42  | 83.05 | C58-Fe55-C61 | 159.7 | C78-C79-C80  | 108.2 | Fe97-C106-C105 | 70.81 |
| O20-Mo9-O44  | 103   | C58-Fe55-C62 | 124.3 | C78-C79-H89  | 126.1 | Fe97-C106-H116 | 123.7 |
| O28-Mo9-O32  | 155.9 | C58-Fe55-C63 | 109.9 | C80-C79-H89  | 125.6 | C102-C106-C105 | 107.9 |
| O28-Mo9-O42  | 86.55 | C58-Fe55-C64 | 124   | Fe76-C80-C77 | 68.5  | C102-C106-H116 | 125.8 |
| O28-Mo9-O44  | 101.8 | C59-Fe55-C60 | 122.5 | Fe76-C80-C79 | 71.55 | C105-C106-H116 | 126.2 |
| O32-Mo9-O42  | 70.52 | C59-Fe55-C61 | 158.9 | Fe76-C80-H90 | 123.8 | H118-O117-H119 | 104.3 |
| O32-Mo9-O44  | 101.7 | C59-Fe55-C62 | 158.5 | C77-C80-C79  | 108.2 | H121-O120-H122 | 103.1 |
| O42-Mo9-O44  | 170   | C59-Fe55-C63 | 123.1 | C77-C80-H90  | 126.6 | H124-O123-H125 | 103.7 |
| O14-Mo10-O22 | 70.65 | C59-Fe55-C64 | 107.9 | C79-C80-H90  | 125.2 | H127-O126-H128 | 103   |
| O14-Mo10-O24 | 82.5  | C60-Fe55-C61 | 41.11 | Fe76-C81-C82 | 68.14 | H130-O129-H131 | 105.4 |
| O14-Mo10-O31 | 154.6 | C60-Fe55-C62 | 68.56 | Fe76-C81-C85 | 70.2  | H133-O132-H134 | 106.9 |
| O14-Mo10-O34 | 86.19 | C60-Fe55-C63 | 67.57 | Fe76-C81-H95 | 124.6 |                |       |



**Table S10** Torsional angles between atoms in FcPW optimized structure in aqueous phase

| Atoms          | Torsion | Atoms            | Torsion | Atoms            | Torsion | Atoms              | Torsion |
|----------------|---------|------------------|---------|------------------|---------|--------------------|---------|
| O18-W1-O19-W3  | -145.3  | O22-P13-O42-W7   | 59.32   | C62-C63-C64-H74  | 174.95  | H93-C84-C85-C81    | -179.7  |
| O21-W1-O19-W3  | -40.47  | O22-P13-O42-W9   | -59.19  | H73-C63-C64-Fe55 | -117.2  | H93-C84-C85-H94    | -1.98   |
| O26-W1-O19-W3  | 117.6   | O33-P13-O42-W7   | -61.28  | H73-C63-C64-C60  | -175.1  | C98-C96-Fe97-C99   | 120.5   |
| O37-W1-O19-W3  | 45.35   | O33-P13-O42-W9   | -179.8  | H73-C63-C64-H74  | -0.04   | C98-C96-Fe97-C100  | 82.08   |
| O39-W1-O19-W3  | 29.44   | O37-P13-O42-W7   | 178.9   | C77-C75-Fe76-C78 | 118.52  | C98-C96-Fe97-C101  | 37.25   |
| O18-W1-O21-W5  | 143     | O37-P13-O42-W9   | 60.39   | C77-C75-Fe76-C79 | 81.76   | C98-C96-Fe97-C102  | -57.06  |
| O19-W1-O21-W5  | 38.46   | C56-C54-Fe55-C57 | 117.75  | C77-C75-Fe76-C80 | 38.47   | C98-C96-Fe97-C103  | -94.29  |
| O26-W1-O21-W5  | -47.4   | C56-C54-Fe55-C58 | 80.51   | C77-C75-Fe76-C81 | 167.5   | C98-C96-Fe97-C104  | -138.2  |
| O37-W1-O21-W5  | -49.73  | C56-C54-Fe55-C59 | 37.91   | C77-C75-Fe76-C82 | -32.91  | C98-C96-Fe97-C105  | -177.2  |
| O39-W1-O21-W5  | -121.8  | C56-C54-Fe55-C60 | -77.73  | C77-C75-Fe76-C83 | -70.78  | C98-C96-Fe97-C106  | 147.49  |
| O18-W1-O26-W4  | 164.1   | C56-C54-Fe55-C61 | -120.2  | C77-C75-Fe76-C84 | -113.8  | C99-C96-Fe97-C98   | -120.5  |
| O19-W1-O26-W4  | -90.31  | C56-C54-Fe55-C62 | -162.1  | C77-C75-Fe76-C85 | -156.5  | C99-C96-Fe97-C100  | -38.42  |
| O21-W1-O26-W4  | -5.88   | C56-C54-Fe55-C63 | 167.62  | C78-C75-Fe76-C77 | -118.5  | C99-C96-Fe97-C101  | -83.26  |
| O37-W1-O26-W4  | -3.45   | C56-C54-Fe55-C64 | -46.36  | C78-C75-Fe76-C79 | -36.76  | C99-C96-Fe97-C102  | -177.6  |
| O39-W1-O26-W4  | 68.63   | C57-C54-Fe55-C56 | -117.8  | C78-C75-Fe76-C80 | -80.05  | C99-C96-Fe97-C103  | 145.2   |
| O18-W1-O37-P13 | 177.7   | C57-C54-Fe55-C58 | -37.23  | C78-C75-Fe76-C81 | 48.98   | C99-C96-Fe97-C104  | 101.35  |
| O19-W1-O37-P13 | -40.56  | C57-C54-Fe55-C59 | -79.84  | C78-C75-Fe76-C82 | -151.4  | C99-C96-Fe97-C105  | 62.3    |
| O21-W1-O37-P13 | 44.94   | C57-C54-Fe55-C60 | 164.52  | C78-C75-Fe76-C83 | 170.7   | C99-C96-Fe97-C106  | 26.98   |
| O26-W1-O37-P13 | -134.2  | C57-C54-Fe55-C61 | 122.02  | C78-C75-Fe76-C84 | 127.71  | H107-C96-Fe97-C98  | 120.38  |
| O39-W1-O37-P13 | 133.5   | C57-C54-Fe55-C62 | 80.14   | C78-C75-Fe76-C85 | 84.98   | H107-C96-Fe97-C99  | -119.1  |
| O18-W1-O39-W8  | -165    | C57-C54-Fe55-C63 | 49.87   | H86-C75-Fe76-C77 | 119.64  | H107-C96-Fe97-C100 | -157.5  |
| O19-W1-O39-W8  | 20.13   | C57-C54-Fe55-C64 | -164.1  | H86-C75-Fe76-C78 | -121.8  | H107-C96-Fe97-C101 | 157.63  |
| O21-W1-O39-W8  | 89.71   | H65-C54-Fe55-C56 | 120.37  | H86-C75-Fe76-C79 | -158.6  | H107-C96-Fe97-C102 | 63.32   |
| O26-W1-O39-W8  | -69.16  | H65-C54-Fe55-C57 | -121.9  | H86-C75-Fe76-C80 | 158.11  | H107-C96-Fe97-C103 | 26.09   |
| O37-W1-O39-W8  | 3.39    | H65-C54-Fe55-C58 | -159.1  | H86-C75-Fe76-C81 | -72.86  | H107-C96-Fe97-C104 | -17.77  |
| O20-W2-O14-W10 | -87.98  | H65-C54-Fe55-C59 | 158.28  | H86-C75-Fe76-C82 | 86.73   | H107-C96-Fe97-C105 | -56.81  |

|                |        |                  |        |                  |        |                    |        |
|----------------|--------|------------------|--------|------------------|--------|--------------------|--------|
| O22-W2-O14-W10 | -3.94  | H65-C54-Fe55-C60 | 42.64  | H86-C75-Fe76-C83 | 48.86  | H107-C96-Fe97-C106 | -92.13 |
| O25-W2-O14-W10 | 66.25  | H65-C54-Fe55-C61 | 0.13   | H86-C75-Fe76-C84 | 5.87   | Fe97-C96-C98-C101  | -57.42 |
| O38-W2-O14-W10 | -11.96 | H65-C54-Fe55-C62 | -41.74 | H86-C75-Fe76-C85 | -36.86 | Fe97-C96-C98-H108  | 119.11 |
| O48-W2-O14-W10 | 169.3  | H65-C54-Fe55-C63 | -72.01 | Fe76-C75-C77-C80 | -60.87 | C99-C96-C98-Fe97   | 57.16  |
| O14-W2-O20-W9  | 121.9  | H65-C54-Fe55-C64 | 74.01  | Fe76-C75-C77-H87 | 118.37 | C99-C96-C98-C101   | -0.25  |
| O22-W2-O20-W9  | 50.65  | Fe55-C54-C56-C59 | -61.73 | C78-C75-C77-Fe76 | 61     | C99-C96-C98-H108   | 176.27 |
| O25-W2-O20-W9  | 36.23  | Fe55-C54-C56-H66 | 114.63 | C78-C75-C77-C80  | 0.14   | H107-C96-C98-Fe97  | -119.5 |
| O38-W2-O20-W9  | -33.87 | C57-C54-C56-Fe55 | 61.32  | C78-C75-C77-H87  | 179.37 | H107-C96-C98-C101  | -176.9 |
| O48-W2-O20-W9  | -134   | C57-C54-C56-C59  | -0.4   | H86-C75-C77-Fe76 | -119.4 | H107-C96-C98-H108  | -0.36  |
| O14-W2-O22-W5  | 91.84  | C57-C54-C56-H66  | 175.96 | H86-C75-C77-C80  | 179.74 | Fe97-C96-C99-C100  | 58.72  |
| O14-W2-O22-W10 | 2.44   | H65-C54-C56-Fe55 | -118   | H86-C75-C77-H87  | -1.02  | Fe97-C96-C99-H109  | -121.2 |
| O14-W2-O22-P13 | -132.4 | H65-C54-C56-C59  | -179.8 | Fe76-C75-C78-C79 | 59.44  | C98-C96-C99-Fe97   | -58.22 |
| O20-W2-O22-W5  | -176.1 | H65-C54-C56-H66  | -3.39  | Fe76-C75-C78-H88 | -118.8 | C98-C96-C99-C100   | 0.5    |
| O20-W2-O22-W10 | 94.55  | Fe55-C54-C57-C58 | 61.13  | C77-C75-C78-Fe76 | -59.39 | C98-C96-C99-H109   | -179.4 |
| O20-W2-O22-P13 | -40.3  | Fe55-C54-C57-H67 | -117.3 | C77-C75-C78-C79  | 0.05   | H107-C96-C99-Fe97  | 118.42 |
| O25-W2-O22-W5  | -2.66  | C56-C54-C57-Fe55 | -60.59 | C77-C75-C78-H88  | -178.1 | H107-C96-C99-C100  | 177.14 |
| O25-W2-O22-W10 | -92.07 | C56-C54-C57-C58  | 0.54   | H86-C75-C78-Fe76 | 121.01 | H107-C96-C99-H109  | -2.73  |
| O25-W2-O22-P13 | 133.1  | C56-C54-C57-H67  | -177.9 | H86-C75-C78-C79  | -179.6 | C96-Fe97-C98-C101  | 120.15 |
| O38-W2-O22-W5  | -91.55 | H65-C54-C57-Fe55 | 118.75 | H86-C75-C78-H88  | 2.26   | C96-Fe97-C98-H108  | -120.4 |
| O38-W2-O22-W10 | 179.1  | H65-C54-C57-C58  | 179.88 | C75-Fe76-C77-C80 | 117.98 | C99-Fe97-C98-C96   | -36.71 |
| O38-W2-O22-P13 | 44.2   | H65-C54-C57-H67  | 1.44   | C75-Fe76-C77-H87 | -120.6 | C99-Fe97-C98-C101  | 83.44  |
| O48-W2-O22-W5  | 37.84  | C54-Fe55-C56-C59 | 118.19 | C78-Fe76-C77-C75 | -37.81 | C99-Fe97-C98-H108  | -157.1 |
| O48-W2-O22-W10 | -51.57 | C54-Fe55-C56-H66 | -119.8 | C78-Fe76-C77-C80 | 80.17  | C100-Fe97-C98-C96  | -81.25 |
| O48-W2-O22-P13 | 173.6  | C57-Fe55-C56-C54 | -38.58 | C78-Fe76-C77-H87 | -158.4 | C100-Fe97-C98-C101 | 38.9   |
| O14-W2-O25-W5  | -66.57 | C57-Fe55-C56-C59 | 79.61  | C79-Fe76-C77-C75 | -80.67 | C100-Fe97-C98-H108 | 158.34 |
| O20-W2-O25-W5  | 19.57  | C57-Fe55-C56-H66 | -158.4 | C79-Fe76-C77-C80 | 37.31  | C101-Fe97-C98-C96  | -120.2 |
| O22-W2-O25-W5  | 4.33   | C58-Fe55-C56-C54 | -81.65 | C79-Fe76-C77-H87 | 158.71 | C101-Fe97-C98-H108 | 119.44 |
| O38-W2-O25-W5  | 89.02  | C58-Fe55-C56-C59 | 36.55  | C80-Fe76-C77-C75 | -118   | C102-Fe97-C98-C96  | 148.47 |
| O48-W2-O25-W5  | -170.3 | C58-Fe55-C56-H66 | 158.58 | C80-Fe76-C77-H87 | 121.4  | C102-Fe97-C98-C101 | -91.38 |
| O14-W2-O38-W8  | -43.8  | C59-Fe55-C56-C54 | -118.2 | C81-Fe76-C77-C75 | -163.9 | C102-Fe97-C98-H108 | 28.06  |

|                |        |                  |        |                  |        |                    |        |
|----------------|--------|------------------|--------|------------------|--------|--------------------|--------|
| O20-W2-O38-W8  | 33.56  | C59-Fe55-C56-H66 | 122.04 | C81-Fe76-C77-C80 | -45.92 | C103-Fe97-C98-C96  | 103.75 |
| O22-W2-O38-W8  | -51.43 | C60-Fe55-C56-C54 | 120.36 | C81-Fe76-C77-H87 | 75.48  | C103-Fe97-C98-C101 | -136.1 |
| O25-W2-O38-W8  | -122.2 | C60-Fe55-C56-C59 | -121.4 | C82-Fe76-C77-C75 | 169    | C103-Fe97-C98-H108 | -16.66 |
| O48-W2-O38-W8  | 134.9  | C60-Fe55-C56-H66 | 0.59   | C82-Fe76-C77-C80 | -73.02 | C104-Fe97-C98-C96  | 63.25  |
| O19-W3-O17-W5  | -32.21 | C61-Fe55-C56-C54 | 78.61  | C82-Fe76-C77-H87 | 48.37  | C104-Fe97-C98-C101 | -176.6 |
| O30-W3-O17-W5  | 124.4  | C61-Fe55-C56-C59 | -163.2 | C83-Fe76-C77-C75 | 127.84 | C104-Fe97-C98-H108 | -57.16 |
| O33-W3-O17-W5  | 53.46  | C61-Fe55-C56-H66 | -41.16 | C83-Fe76-C77-C80 | -114.2 | C105-Fe97-C98-C96  | 17.49  |
| O40-W3-O17-W5  | 37.65  | C62-Fe55-C56-C54 | 48.79  | C83-Fe76-C77-H87 | 7.22   | C105-Fe97-C98-C101 | 137.64 |
| O46-W3-O17-W5  | -136   | C62-Fe55-C56-C59 | 166.99 | C84-Fe76-C77-C75 | 85.65  | C105-Fe97-C98-H108 | -102.9 |
| O17-W3-O19-W1  | 38.29  | C62-Fe55-C56-H66 | -70.98 | C84-Fe76-C77-C80 | -156.4 | C106-Fe97-C98-C96  | -173   |
| O30-W3-O19-W1  | -43    | C63-Fe55-C56-C54 | -169.4 | C84-Fe76-C77-H87 | -34.97 | C106-Fe97-C98-C101 | -52.82 |
| O33-W3-O19-W1  | -46.2  | C63-Fe55-C56-C59 | -51.18 | C85-Fe76-C77-C75 | 56.18  | C106-Fe97-C98-H108 | 66.62  |
| O40-W3-O19-W1  | -117.6 | C63-Fe55-C56-H66 | 70.86  | C85-Fe76-C77-C80 | 174.16 | C96-Fe97-C99-C100  | -118.8 |
| O46-W3-O19-W1  | 142.8  | C64-Fe55-C56-C54 | 161.35 | C85-Fe76-C77-H87 | -64.45 | C96-Fe97-C99-H109  | 121.24 |
| O17-W3-O30-W11 | -87.04 | C64-Fe55-C56-C59 | -80.46 | C75-Fe76-C78-C79 | -119.8 | C98-Fe97-C99-C96   | 36.28  |
| O19-W3-O30-W11 | -7.2   | C64-Fe55-C56-H66 | 41.58  | C75-Fe76-C78-H88 | 120.16 | C98-Fe97-C99-C100  | -82.49 |
| O33-W3-O30-W11 | -3.83  | C54-Fe55-C57-C58 | -118.9 | C77-Fe76-C78-C75 | 38.46  | C98-Fe97-C99-H109  | 157.53 |
| O40-W3-O30-W11 | 67.27  | C54-Fe55-C57-H67 | 120.24 | C77-Fe76-C78-C79 | -81.37 | C100-Fe97-C99-C96  | 118.77 |
| O46-W3-O30-W11 | 167.1  | C56-Fe55-C57-C54 | 38.84  | C77-Fe76-C78-H88 | 158.62 | C100-Fe97-C99-H109 | -120   |
| O17-W3-O33-W11 | 96.07  | C56-Fe55-C57-C58 | -80.06 | C79-Fe76-C78-C75 | 119.83 | C101-Fe97-C99-C96  | 79.86  |
| O17-W3-O33-P13 | -40.96 | C56-Fe55-C57-H67 | 159.08 | C79-Fe76-C78-H88 | -120   | C101-Fe97-C99-C100 | -38.91 |
| O19-W3-O33-W11 | -178.9 | C58-Fe55-C57-C54 | 118.9  | C80-Fe76-C78-C75 | 82.83  | C101-Fe97-C99-H109 | -158.9 |
| O19-W3-O33-P13 | 44.03  | C58-Fe55-C57-H67 | -120.9 | C80-Fe76-C78-C79 | -37    | C102-Fe97-C99-C96  | 167.24 |
| O30-W3-O33-W11 | 2.42   | C59-Fe55-C57-C54 | 82.52  | C80-Fe76-C78-H88 | -157   | C102-Fe97-C99-C100 | 48.47  |
| O30-W3-O33-P13 | -134.6 | C59-Fe55-C57-C58 | -36.37 | C81-Fe76-C78-C75 | -159   | C102-Fe97-C99-H109 | -71.52 |
| O40-W3-O33-W11 | -91.1  | C59-Fe55-C57-H67 | -157.2 | C81-Fe76-C78-C79 | 81.19  | C103-Fe97-C99-C96  | -60.18 |

|                |        |                  |        |                  |        |                     |        |
|----------------|--------|------------------|--------|------------------|--------|---------------------|--------|
| O40-W3-O33-P13 | 131.9  | C60-Fe55-C57-C54 | -40.07 | C81-Fe76-C78-H88 | -38.82 | C103-Fe97-C99-C100  | -179   |
| O46-W3-O33-W11 | -40.44 | C60-Fe55-C57-C58 | -159   | C82-Fe76-C78-C75 | 161.89 | C103-Fe97-C99-H109  | 61.06  |
| O46-W3-O33-P13 | -177.5 | C60-Fe55-C57-H67 | 80.18  | C82-Fe76-C78-C79 | 42.05  | C104-Fe97-C99-C96   | -95.36 |
| O17-W3-O40-W12 | 20.66  | C61-Fe55-C57-C54 | -76.93 | C82-Fe76-C78-H88 | -77.95 | C104-Fe97-C99-C100  | 145.87 |
| O19-W3-O40-W12 | 90.12  | C61-Fe55-C57-C58 | 164.18 | C83-Fe76-C78-C75 | -30.66 | C104-Fe97-C99-H109  | 25.88  |
| O30-W3-O40-W12 | -67.08 | C61-Fe55-C57-H67 | 43.31  | C83-Fe76-C78-C79 | -150.5 | C105-Fe97-C99-C96   | -138   |
| O33-W3-O40-W12 | 4.03   | C62-Fe55-C57-C54 | -120.2 | C83-Fe76-C78-H88 | 89.5   | C105-Fe97-C99-C100  | 103.24 |
| O46-W3-O40-W12 | -165.6 | C62-Fe55-C57-C58 | 120.91 | C84-Fe76-C78-C75 | -73.45 | C105-Fe97-C99-H109  | -16.75 |
| O29-W4-O26-W1  | 19.55  | C62-Fe55-C57-H67 | 0.05   | C84-Fe76-C78-C79 | 166.71 | C106-Fe97-C99-C96   | -175.5 |
| O35-W4-O26-W1  | 85.72  | C63-Fe55-C57-C54 | -162   | C84-Fe76-C78-H88 | 46.7   | C106-Fe97-C99-C100  | 65.74  |
| O36-W4-O26-W1  | -69.03 | C63-Fe55-C57-C58 | 79.11  | C85-Fe76-C78-C75 | -115.9 | C106-Fe97-C99-H109  | -54.25 |
| O51-W4-O26-W1  | -172   | C63-Fe55-C57-H67 | -41.76 | C85-Fe76-C78-C79 | 124.24 | C96-Fe97-C100-C99   | 37.21  |
| O26-W4-O29-W6  | 34.69  | C64-Fe55-C57-C54 | 162.89 | C85-Fe76-C78-H88 | 4.23   | C96-Fe97-C100-C101  | -80.39 |
| O35-W4-O29-W6  | -31.53 | C64-Fe55-C57-C58 | 44     | C75-Fe76-C79-C78 | 37.45  | C96-Fe97-C100-H110  | 158.36 |
| O36-W4-O29-W6  | 122.2  | C64-Fe55-C57-H67 | -76.87 | C75-Fe76-C79-C80 | -82.73 | C98-Fe97-C100-C99   | 79.68  |
| O51-W4-O29-W6  | -133.6 | C54-Fe55-C58-C57 | 38.31  | C75-Fe76-C79-H89 | 158.01 | C98-Fe97-C100-C101  | -37.93 |
| O26-W4-O35-W12 | -132.1 | C54-Fe55-C58-C59 | -82.19 | C77-Fe76-C79-C78 | 82.02  | C98-Fe97-C100-H110  | -159.2 |
| O29-W4-O35-W12 | 24.74  | C54-Fe55-C58-H68 | 158.02 | C77-Fe76-C79-C80 | -38.16 | C99-Fe97-C100-C101  | -117.6 |
| O36-W4-O35-W12 | -58.83 | C56-Fe55-C58-C57 | 83.09  | C77-Fe76-C79-H89 | -157.4 | C99-Fe97-C100-H110  | 121.14 |
| O51-W4-O35-W12 | 127.5  | C56-Fe55-C58-C59 | -37.41 | C78-Fe76-C79-C80 | -120.2 | C101-Fe97-C100-C99  | 117.6  |
| O26-W4-O36-W8  | 66.85  | C56-Fe55-C58-H68 | -157.2 | C78-Fe76-C79-H89 | 120.56 | C101-Fe97-C100-H110 | -121.3 |
| O29-W4-O36-W8  | -87.82 | C57-Fe55-C58-C59 | -120.5 | C80-Fe76-C79-C78 | 120.18 | C102-Fe97-C100-C99  | -173.6 |
| O35-W4-O36-W8  | -5.94  | C57-Fe55-C58-H68 | 119.71 | C80-Fe76-C79-H89 | -119.3 | C102-Fe97-C100-C101 | 68.85  |
| O51-W4-O36-W8  | 167.8  | C59-Fe55-C58-C57 | 120.5  | C81-Fe76-C79-C78 | -117.3 | C102-Fe97-C100-H110 | -52.41 |
| O21-W5-O17-W3  | 31.68  | C59-Fe55-C58-H68 | -119.8 | C81-Fe76-C79-C80 | 122.5  | C103-Fe97-C100-C99  | 172.25 |
| O22-W5-O17-W3  | -54.28 | C60-Fe55-C58-C57 | 160.02 | C81-Fe76-C79-H89 | 3.24   | C103-Fe97-C100-C101 | 54.65  |

|                |        |                  |        |                  |        |                     |        |
|----------------|--------|------------------|--------|------------------|--------|---------------------|--------|
| O25-W5-O17-W3  | -48.23 | C60-Fe55-C58-C59 | 39.53  | C82-Fe76-C79-C78 | -160.1 | C103-Fe97-C100-H110 | -66.61 |
| O34-W5-O17-W3  | -125.9 | C60-Fe55-C58-H68 | -80.26 | C82-Fe76-C79-C80 | 79.76  | C104-Fe97-C100-C99  | -58.37 |
| O50-W5-O17-W3  | 134.9  | C61-Fe55-C58-C57 | -41.2  | C82-Fe76-C79-H89 | -39.49 | C104-Fe97-C100-C101 | -176   |
| O17-W5-O21-W1  | -35.26 | C61-Fe55-C58-C59 | -161.7 | C83-Fe76-C79-C78 | 164.26 | C104-Fe97-C100-H110 | 62.78  |
| O22-W5-O21-W1  | 48.52  | C61-Fe55-C58-H68 | 78.51  | C83-Fe76-C79-C80 | 44.08  | C105-Fe97-C100-C99  | -93.17 |
| O25-W5-O21-W1  | 119.9  | C62-Fe55-C58-C57 | -78.75 | C83-Fe76-C79-H89 | -75.18 | C105-Fe97-C100-C101 | 149.23 |
| O34-W5-O21-W1  | 36.09  | C62-Fe55-C58-C59 | 160.75 | C84-Fe76-C79-C78 | -44.56 | C105-Fe97-C100-H110 | 27.98  |
| O50-W5-O21-W1  | -139.6 | C62-Fe55-C58-H68 | 40.96  | C84-Fe76-C79-C80 | -164.7 | C106-Fe97-C100-C99  | -135.9 |
| O17-W5-O22-W2  | 179.9  | C63-Fe55-C58-C57 | -121.1 | C84-Fe76-C79-H89 | 76     | C106-Fe97-C100-C101 | 106.52 |
| O17-W5-O22-W10 | -91.21 | C63-Fe55-C58-C59 | 118.42 | C85-Fe76-C79-C78 | -77.49 | C106-Fe97-C100-H110 | -14.73 |
| O17-W5-O22-P13 | 43.57  | C63-Fe55-C58-H68 | -1.37  | C85-Fe76-C79-C80 | 162.32 | C96-Fe97-C101-C98   | -36.35 |
| O21-W5-O22-W2  | 94.64  | C64-Fe55-C58-C57 | -163   | C85-Fe76-C79-H89 | 43.07  | C96-Fe97-C101-C100  | 81.64  |
| O21-W5-O22-W10 | -176.5 | C64-Fe55-C58-C59 | 76.55  | C75-Fe76-C80-C77 | -38.63 | C96-Fe97-C101-H111  | -158.2 |
| O21-W5-O22-P13 | -41.69 | C64-Fe55-C58-H68 | -43.24 | C75-Fe76-C80-C79 | 80.41  | C98-Fe97-C101-C100  | 117.98 |
| O25-W5-O22-W2  | 2.62   | C54-Fe55-C59-C56 | -38.75 | C75-Fe76-C80-H90 | -159   | C98-Fe97-C101-H111  | -121.8 |
| O25-W5-O22-W10 | 91.52  | C54-Fe55-C59-C58 | 81.19  | C77-Fe76-C80-C79 | 119.04 | C99-Fe97-C101-C98   | -79.31 |
| O25-W5-O22-P13 | -133.7 | C54-Fe55-C59-H69 | -158.7 | C77-Fe76-C80-H90 | -120.4 | C99-Fe97-C101-C100  | 38.67  |
| O34-W5-O22-W2  | -90.59 | C56-Fe55-C59-C58 | 119.94 | C78-Fe76-C80-C77 | -82.37 | C99-Fe97-C101-H111  | 158.88 |
| O34-W5-O22-W10 | -1.69  | C56-Fe55-C59-H69 | -120   | C78-Fe76-C80-C79 | 36.67  | C100-Fe97-C101-C98  | -118   |
| O34-W5-O22-P13 | 133.1  | C57-Fe55-C59-C56 | -83.19 | C78-Fe76-C80-H90 | 157.25 | C100-Fe97-C101-H111 | 120.21 |
| O50-W5-O22-W2  | -45.75 | C57-Fe55-C59-C58 | 36.75  | C79-Fe76-C80-C77 | -119   | C102-Fe97-C101-C98  | 107.24 |
| O50-W5-O22-W10 | 43.14  | C57-Fe55-C59-H69 | 156.84 | C79-Fe76-C80-H90 | 120.58 | C102-Fe97-C101-C100 | -134.8 |
| O50-W5-O22-P13 | 177.9  | C58-Fe55-C59-C56 | -119.9 | C81-Fe76-C80-C77 | 163.93 | C102-Fe97-C101-H111 | -14.57 |
| O17-W5-O25-W2  | -10.72 | C58-Fe55-C59-H69 | 120.09 | C81-Fe76-C80-C79 | -77.03 | C103-Fe97-C101-C98  | 67.45  |
| O21-W5-O25-W2  | -89.38 | C60-Fe55-C59-C56 | 76.25  | C81-Fe76-C80-H90 | 43.55  | C103-Fe97-C101-C100 | -174.6 |
| O22-W5-O25-W2  | -4.39  | C60-Fe55-C59-C58 | -163.8 | C82-Fe76-C80-C77 | 124.75 | C103-Fe97-C101-H111 | -54.36 |

|                |        |                  |        |                  |        |                     |        |
|----------------|--------|------------------|--------|------------------|--------|---------------------|--------|
| O34-W5-O25-W2  | 67.05  | C60-Fe55-C59-H69 | -43.72 | C82-Fe76-C80-C79 | -116.2 | C104-Fe97-C101-C98  | 30.53  |
| O50-W5-O25-W2  | 166.2  | C61-Fe55-C59-C56 | 42.57  | C82-Fe76-C80-H90 | 4.37   | C104-Fe97-C101-C100 | 148.51 |
| O17-W5-O34-W10 | 86.67  | C61-Fe55-C59-C58 | 162.51 | C83-Fe76-C80-C77 | 82.31  | C104-Fe97-C101-H111 | -91.28 |
| O21-W5-O34-W10 | 15.84  | C61-Fe55-C59-H69 | -77.39 | C83-Fe76-C80-C79 | -158.7 | C105-Fe97-C101-C98  | -172.3 |
| O22-W5-O34-W10 | 2.77   | C62-Fe55-C59-C56 | -168   | C83-Fe76-C80-H90 | -38.07 | C105-Fe97-C101-C100 | -54.27 |
| O25-W5-O34-W10 | -68.61 | C62-Fe55-C59-C58 | -48.05 | C84-Fe76-C80-C77 | 52.18  | C105-Fe97-C101-H111 | 65.94  |
| O50-W5-O34-W10 | -168.4 | C62-Fe55-C59-H69 | 72.04  | C84-Fe76-C80-C79 | 171.21 | C106-Fe97-C101-C98  | 151.09 |
| O23-W6-O16-W9  | -58.92 | C63-Fe55-C59-C56 | 158.98 | C84-Fe76-C80-H90 | -68.2  | C106-Fe97-C101-C100 | -90.92 |
| O29-W6-O16-W9  | 97.79  | C63-Fe55-C59-C58 | -81.08 | C85-Fe76-C80-C77 | -172.1 | C106-Fe97-C101-H111 | 29.29  |
| O43-W6-O16-W9  | -160.9 | C63-Fe55-C59-H69 | 39.02  | C85-Fe76-C80-C79 | -53.08 | C96-Fe97-C102-C103  | -56.73 |
| O47-W6-O16-W9  | 33.36  | C64-Fe55-C59-C56 | 118.08 | C85-Fe76-C80-H90 | 67.5   | C96-Fe97-C102-C106  | -175.4 |
| O16-W6-O23-W7  | 66.68  | C64-Fe55-C59-C58 | -122   | C75-Fe76-C81-C82 | 170.94 | C96-Fe97-C102-H112  | 63.58  |
| O29-W6-O23-W7  | 0.07   | C64-Fe55-C59-H69 | -1.89  | C75-Fe76-C81-C85 | 50.82  | C98-Fe97-C102-C103  | -93.26 |
| O43-W6-O23-W7  | 169.62 | C54-Fe55-C60-C61 | -79.26 | C75-Fe76-C81-H95 | -69.73 | C98-Fe97-C102-C106  | 148.07 |
| O47-W6-O23-W7  | -85.12 | C54-Fe55-C60-C64 | 162.35 | C77-Fe76-C81-C82 | -35.83 | C98-Fe97-C102-H112  | 27.05  |
| O16-W6-O29-W4  | -120.7 | C54-Fe55-C60-H70 | 40.12  | C77-Fe76-C81-C85 | -156   | C99-Fe97-C102-C103  | 137.99 |
| O23-W6-O29-W4  | -52.91 | C56-Fe55-C60-C61 | -121.4 | C77-Fe76-C81-H95 | 83.5   | C99-Fe97-C102-C106  | 19.32  |
| O43-W6-O29-W4  | 137.57 | C56-Fe55-C60-C64 | 120.19 | C78-Fe76-C81-C82 | -154   | C99-Fe97-C102-H112  | -101.7 |
| O47-W6-O29-W4  | 34.03  | C56-Fe55-C60-H70 | -2.04  | C78-Fe76-C81-C85 | 85.87  | C100-Fe97-C102-C103 | -178.3 |
| O16-W6-O47-W12 | 31.08  | C57-Fe55-C60-C61 | -49.4  | C78-Fe76-C81-H95 | -34.68 | C100-Fe97-C102-C106 | 63.07  |
| O23-W6-O47-W12 | 122.04 | C57-Fe55-C60-C64 | -167.8 | C79-Fe76-C81-C82 | -112.3 | C100-Fe97-C102-H112 | -57.96 |
| O29-W6-O47-W12 | -32.69 | C57-Fe55-C60-H70 | 69.98  | C79-Fe76-C81-C85 | 127.59 | C101-Fe97-C102-C103 | -137   |
| O43-W6-O47-W12 | -134.6 | C58-Fe55-C60-C61 | 169.07 | C79-Fe76-C81-H95 | 7.04   | C101-Fe97-C102-C106 | 104.31 |
| O15-W7-O23-W6  | -173.5 | C58-Fe55-C60-C64 | 50.68  | C80-Fe76-C81-C82 | -70.88 | C101-Fe97-C102-H112 | -16.71 |
| O24-W7-O23-W6  | 10.55  | C58-Fe55-C60-H70 | -71.55 | C80-Fe76-C81-C85 | 169    | C103-Fe97-C102-C106 | -118.7 |
| O27-W7-O23-W6  | 84.34  | C59-Fe55-C60-C61 | -162.3 | C80-Fe76-C81-H95 | 48.45  | C103-Fe97-C102-H112 | 120.31 |

|                |        |                  |        |                  |        |                     |        |
|----------------|--------|------------------|--------|------------------|--------|---------------------|--------|
| O32-W7-O23-W6  | -70.85 | C59-Fe55-C60-C64 | 79.29  | C82-Fe76-C81-C85 | -120.1 | C104-Fe97-C102-C103 | 38.07  |
| O42-W7-O23-W6  | 0.74   | C59-Fe55-C60-H70 | -42.94 | C82-Fe76-C81-H95 | 119.33 | C104-Fe97-C102-C106 | -80.61 |
| O15-W7-O24-W10 | -129.8 | C61-Fe55-C60-C64 | -118.4 | C83-Fe76-C81-C82 | 38.44  | C104-Fe97-C102-H112 | 158.37 |
| O23-W7-O24-W10 | 46.17  | C61-Fe55-C60-H70 | 119.38 | C83-Fe76-C81-C85 | -81.68 | C105-Fe97-C102-C103 | 81.3   |
| O27-W7-O24-W10 | -27.69 | C62-Fe55-C60-C61 | 38.42  | C83-Fe76-C81-H95 | 157.77 | C105-Fe97-C102-C106 | -37.37 |
| O32-W7-O24-W10 | 126.18 | C62-Fe55-C60-C64 | -79.97 | C84-Fe76-C81-C82 | 82.97  | C105-Fe97-C102-H112 | -158.4 |
| O42-W7-O24-W10 | 55.45  | C62-Fe55-C60-H70 | 157.8  | C84-Fe76-C81-C85 | -37.15 | C106-Fe97-C102-C103 | 118.67 |
| O15-W7-O27-W11 | 130.25 | C63-Fe55-C60-C61 | 81.7   | C84-Fe76-C81-H95 | -157.7 | C106-Fe97-C102-H112 | -121   |
| O23-W7-O27-W11 | -125.8 | C63-Fe55-C60-C64 | -36.69 | C85-Fe76-C81-C82 | 120.12 | C96-Fe97-C103-C102  | 149.04 |
| O24-W7-O27-W11 | 29.25  | C63-Fe55-C60-H70 | -158.9 | C85-Fe76-C81-H95 | -120.6 | C96-Fe97-C103-C104  | -92.75 |
| O32-W7-O27-W11 | -55.07 | C64-Fe55-C60-C61 | 118.39 | C75-Fe76-C82-C81 | -167.4 | C96-Fe97-C103-H113  | 27.99  |
| O42-W7-O27-W11 | -55.24 | C64-Fe55-C60-H70 | -122.2 | C75-Fe76-C82-C83 | -48.65 | C98-Fe97-C103-C102  | 106.17 |
| O15-W7-O32-W9  | 174.32 | C54-Fe55-C61-C60 | 119.31 | C75-Fe76-C82-H91 | 72.64  | C98-Fe97-C103-C104  | -135.6 |
| O23-W7-O32-W9  | 70.79  | C54-Fe55-C61-C62 | -122.6 | C77-Fe76-C82-C81 | 167.1  | C98-Fe97-C103-H113  | -14.88 |
| O24-W7-O32-W9  | -83.56 | C54-Fe55-C61-H71 | -0.67  | C77-Fe76-C82-C83 | -74.2  | C99-Fe97-C103-C102  | -173.1 |
| O27-W7-O32-W9  | -0.33  | C56-Fe55-C61-C60 | 76.72  | C77-Fe76-C82-H91 | 47.09  | C99-Fe97-C103-C104  | -54.89 |
| O42-W7-O32-W9  | -0.15  | C56-Fe55-C61-C62 | -165.2 | C78-Fe76-C82-C81 | 56.47  | C99-Fe97-C103-H113  | 65.85  |
| O15-W7-O42-W9  | -44.64 | C56-Fe55-C61-H71 | -43.26 | C78-Fe76-C82-C83 | 175.17 | C100-Fe97-C103-C102 | 15.47  |
| O15-W7-O42-P13 | -179.2 | C57-Fe55-C61-C60 | 161.28 | C78-Fe76-C82-H91 | -63.54 | C100-Fe97-C103-C104 | 133.68 |
| O23-W7-O42-W9  | -91.17 | C57-Fe55-C61-C62 | -80.59 | C79-Fe76-C82-C81 | 85.56  | C100-Fe97-C103-H113 | -105.6 |
| O23-W7-O42-P13 | 134.3  | C57-Fe55-C61-H71 | 41.3   | C79-Fe76-C82-C83 | -155.8 | C101-Fe97-C103-C102 | 66.12  |
| O24-W7-O42-W9  | 93.12  | C58-Fe55-C61-C60 | -168.3 | C79-Fe76-C82-H91 | -34.45 | C101-Fe97-C103-C104 | -175.7 |
| O24-W7-O42-P13 | -41.4  | C58-Fe55-C61-C62 | -50.12 | C80-Fe76-C82-C81 | 126.56 | C101-Fe97-C103-H113 | -54.93 |
| O27-W7-O42-W9  | -180   | C58-Fe55-C61-H71 | 71.76  | C80-Fe76-C82-C83 | -114.7 | C102-Fe97-C103-C104 | 118.21 |
| O27-W7-O42-P13 | 45.48  | C59-Fe55-C61-C60 | 45.38  | C80-Fe76-C82-H91 | 6.55   | C102-Fe97-C103-H113 | -121.1 |
| O32-W7-O42-W9  | 0.09   | C59-Fe55-C61-C62 | 163.51 | C81-Fe76-C82-C83 | 118.7  | C104-Fe97-C103-C102 | -118.2 |

|                |        |                  |        |                  |        |                     |        |
|----------------|--------|------------------|--------|------------------|--------|---------------------|--------|
| O32-W7-O42-P13 | -134.4 | C59-Fe55-C61-H71 | -74.6  | C81-Fe76-C82-H91 | -120   | C104-Fe97-C103-H113 | 120.74 |
| O36-W8-O28-W9  | -127.2 | C60-Fe55-C61-C62 | 118.13 | C83-Fe76-C82-C81 | -118.7 | C105-Fe97-C103-C102 | -81.03 |
| O38-W8-O28-W9  | 30.77  | C60-Fe55-C61-H71 | -120   | C83-Fe76-C82-H91 | 121.29 | C105-Fe97-C103-C104 | 37.18  |
| O39-W8-O28-W9  | -49.9  | C62-Fe55-C61-C60 | -118.1 | C84-Fe76-C82-C81 | -80.15 | C105-Fe97-C103-H113 | 157.92 |
| O53-W8-O28-W9  | 132.32 | C62-Fe55-C61-H71 | 121.89 | C84-Fe76-C82-C83 | 38.55  | C106-Fe97-C103-C102 | -37.78 |
| O28-W8-O36-W4  | 86.9   | C63-Fe55-C61-C60 | -80.6  | C84-Fe76-C82-H91 | 159.84 | C106-Fe97-C103-C104 | 80.43  |
| O38-W8-O36-W4  | 17.9   | C63-Fe55-C61-C62 | 37.53  | C85-Fe76-C82-C81 | -36.63 | C106-Fe97-C103-H113 | -158.8 |
| O39-W8-O36-W4  | -67.46 | C63-Fe55-C61-H71 | 159.42 | C85-Fe76-C82-C83 | 82.06  | C96-Fe97-C104-C103  | 105.29 |
| O53-W8-O36-W4  | -169.3 | C64-Fe55-C61-C60 | -37.76 | C85-Fe76-C82-H91 | -156.6 | C96-Fe97-C104-C105  | -135.4 |
| O28-W8-O38-W2  | -32.96 | C64-Fe55-C61-C62 | 80.37  | C75-Fe76-C83-C82 | 164.24 | C96-Fe97-C104-H114  | -14.84 |
| O36-W8-O38-W2  | 36.49  | C64-Fe55-C61-H71 | -157.7 | C75-Fe76-C83-C84 | -77.74 | C98-Fe97-C104-C103  | 68.14  |
| O39-W8-O38-W2  | 121.11 | C54-Fe55-C62-C61 | 76.47  | C75-Fe76-C83-H92 | 43.06  | C98-Fe97-C104-C105  | -172.5 |
| O53-W8-O38-W2  | -136.3 | C54-Fe55-C62-C63 | -164.9 | C77-Fe76-C83-C82 | 124.03 | C98-Fe97-C104-H114  | -52    |
| O28-W8-O39-W1  | -8.74  | C54-Fe55-C62-H72 | -44.4  | C77-Fe76-C83-C84 | -118   | C99-Fe97-C104-C103  | 148.15 |
| O36-W8-O39-W1  | 68.53  | C56-Fe55-C62-C61 | 39.66  | C77-Fe76-C83-H92 | 2.85   | C99-Fe97-C104-C105  | -92.52 |
| O38-W8-O39-W1  | -88.01 | C56-Fe55-C62-C63 | 158.26 | C78-Fe76-C83-C82 | -171.5 | C99-Fe97-C104-H114  | 28.02  |
| O53-W8-O39-W1  | 169.05 | C56-Fe55-C62-H72 | -81.2  | C78-Fe76-C83-C84 | -53.48 | C100-Fe97-C104-C103 | -174.5 |
| O20-W9-O16-W6  | -26.13 | C57-Fe55-C62-C61 | 119.66 | C78-Fe76-C83-H92 | 67.32  | C100-Fe97-C104-C105 | -55.15 |
| O28-W9-O16-W6  | -96.56 | C57-Fe55-C62-C63 | -121.7 | C79-Fe76-C83-C82 | 51.21  | C100-Fe97-C104-H114 | 65.39  |
| O32-W9-O16-W6  | 59.16  | C57-Fe55-C62-H72 | -1.21  | C79-Fe76-C83-C84 | 169.24 | C101-Fe97-C104-C103 | 40.13  |
| O42-W9-O16-W6  | -11.23 | C58-Fe55-C62-C61 | 161.34 | C79-Fe76-C83-H92 | -69.96 | C101-Fe97-C104-C105 | 159.46 |
| O44-W9-O16-W6  | 162.12 | C58-Fe55-C62-C63 | -80.06 | C80-Fe76-C83-C82 | 81.55  | C101-Fe97-C104-H114 | -80.01 |
| O16-W9-O20-W2  | -37.63 | C58-Fe55-C62-H72 | 40.48  | C80-Fe76-C83-C84 | -160.4 | C102-Fe97-C104-C103 | -38.4  |
| O28-W9-O20-W2  | 33.02  | C59-Fe55-C62-C61 | -163.8 | C80-Fe76-C83-H92 | -39.62 | C102-Fe97-C104-C105 | 80.93  |
| O32-W9-O20-W2  | -122.5 | C59-Fe55-C62-C63 | -45.21 | C81-Fe76-C83-C82 | -37.54 | C102-Fe97-C104-H114 | -158.5 |
| O42-W9-O20-W2  | -51.55 | C59-Fe55-C62-H72 | 75.33  | C81-Fe76-C83-C84 | 80.48  | C103-Fe97-C104-C105 | 119.33 |



|                |        |                  |        |                  |        |                     |        |
|----------------|--------|------------------|--------|------------------|--------|---------------------|--------|
| O44-W9-O20-W2  | 134.07 | C60-Fe55-C62-C61 | -38.5  | C81-Fe76-C83-H92 | -158.7 | C103-Fe97-C104-H114 | -120.1 |
| O16-W9-O28-W8  | 123.85 | C60-Fe55-C62-C63 | 80.1   | C82-Fe76-C83-C84 | 118.02 | C105-Fe97-C104-C103 | -119.3 |
| O20-W9-O28-W8  | -30.39 | C60-Fe55-C62-H72 | -159.4 | C82-Fe76-C83-H92 | -121.2 | C105-Fe97-C104-H114 | 120.54 |
| O32-W9-O28-W8  | 47.96  | C61-Fe55-C62-C63 | 118.6  | C84-Fe76-C83-C82 | -118   | C106-Fe97-C104-C103 | -82.2  |
| O42-W9-O28-W8  | 54.85  | C61-Fe55-C62-H72 | -120.9 | C84-Fe76-C83-H92 | 120.8  | C106-Fe97-C104-C105 | 37.12  |
| O44-W9-O28-W8  | -133.8 | C63-Fe55-C62-C61 | -118.6 | C85-Fe76-C83-C82 | -80.34 | C106-Fe97-C104-H114 | 157.66 |
| O16-W9-O32-W7  | -68.05 | C63-Fe55-C62-H72 | 120.53 | C85-Fe76-C83-C84 | 37.68  | C96-Fe97-C105-C104  | 66.73  |
| O20-W9-O32-W7  | 84.7   | C64-Fe55-C62-C61 | -82.01 | C85-Fe76-C83-H92 | 158.48 | C96-Fe97-C105-C106  | -173.5 |
| O28-W9-O32-W7  | 7.4    | C64-Fe55-C62-C63 | 36.59  | C75-Fe76-C84-C83 | 123.44 | C96-Fe97-C105-H115  | -53.03 |
| O42-W9-O32-W7  | 0.15   | C64-Fe55-C62-H72 | 157.12 | C75-Fe76-C84-C85 | -118   | C98-Fe97-C105-C104  | 51.31  |
| O44-W9-O32-W7  | -170.8 | C54-Fe55-C63-C62 | 40.49  | C75-Fe76-C84-H93 | 3.85   | C98-Fe97-C105-C106  | 171.05 |
| O16-W9-O42-W7  | 95.17  | C54-Fe55-C63-C64 | 160.74 | C77-Fe76-C84-C83 | 79.33  | C98-Fe97-C105-H115  | -68.44 |
| O16-W9-O42-P13 | -130.6 | C54-Fe55-C63-H73 | -78.77 | C77-Fe76-C84-C85 | -162.1 | C99-Fe97-C105-C104  | 103.45 |
| O20-W9-O42-W7  | -91.64 | C56-Fe55-C63-C62 | -161   | C77-Fe76-C84-H93 | -40.26 | C99-Fe97-C105-C106  | -136.8 |
| O20-W9-O42-P13 | 42.63  | C56-Fe55-C63-C64 | -40.79 | C78-Fe76-C84-C83 | 164.71 | C99-Fe97-C105-H115  | -16.3  |
| O28-W9-O42-W7  | -177   | C56-Fe55-C63-H73 | 79.7   | C78-Fe76-C84-C85 | -76.72 | C100-Fe97-C105-C104 | 147.31 |
| O28-W9-O42-P13 | -42.75 | C57-Fe55-C63-C62 | 78.18  | C78-Fe76-C84-H93 | 45.12  | C100-Fe97-C105-C106 | -92.95 |
| O32-W9-O42-W7  | -0.09  | C57-Fe55-C63-C64 | -161.6 | C79-Fe76-C84-C83 | -160.1 | C100-Fe97-C105-H115 | 27.56  |
| O32-W9-O42-P13 | 134.17 | C57-Fe55-C63-H73 | -41.08 | C79-Fe76-C84-C85 | -41.57 | C101-Fe97-C105-C104 | -177.2 |
| O44-W9-O42-W7  | 56.93  | C58-Fe55-C63-C62 | 120.12 | C79-Fe76-C84-H93 | 80.27  | C101-Fe97-C105-C106 | -57.44 |
| O44-W9-O42-P13 | -168.8 | C58-Fe55-C63-C64 | -119.6 | C80-Fe76-C84-C83 | 42.55  | C101-Fe97-C105-H115 | 63.07  |
| O22-W10-O14-W2 | 3.98   | C58-Fe55-C63-H73 | 0.86   | C80-Fe76-C84-C85 | 161.11 | C102-Fe97-C105-C104 | -81.96 |
| O24-W10-O14-W2 | 87.91  | C59-Fe55-C63-C62 | 161.93 | C80-Fe76-C84-H93 | -77.04 | C102-Fe97-C105-C106 | 37.79  |
| O31-W10-O14-W2 | 19.19  | C59-Fe55-C63-C64 | -77.83 | C81-Fe76-C84-C83 | -82    | C102-Fe97-C105-H115 | 158.29 |
| O34-W10-O14-W2 | -67.53 | C59-Fe55-C63-H73 | 42.66  | C81-Fe76-C84-C85 | 36.57  | C103-Fe97-C105-C104 | -37.68 |
| O52-W10-O14-W2 | -169.5 | C60-Fe55-C63-C62 | -82.98 | C81-Fe76-C84-H93 | 158.41 | C103-Fe97-C105-C106 | 82.06  |

|                 |        |                  |        |                  |        |                     |        |
|-----------------|--------|------------------|--------|------------------|--------|---------------------|--------|
| O14-W10-O22-W2  | -2.4   | C60-Fe55-C63-C64 | 37.26  | C82-Fe76-C84-C83 | -38.58 | C103-Fe97-C105-H115 | -157.4 |
| O14-W10-O22-W5  | -91.46 | C60-Fe55-C63-H73 | 157.76 | C82-Fe76-C84-C85 | 79.98  | C104-Fe97-C105-C106 | 119.74 |
| O14-W10-O22-P13 | 133.4  | C61-Fe55-C63-C62 | -38.42 | C82-Fe76-C84-H93 | -158.2 | C104-Fe97-C105-H115 | -119.8 |
| O24-W10-O22-W2  | -91.12 | C61-Fe55-C63-C64 | 81.82  | C83-Fe76-C84-C85 | 118.56 | C106-Fe97-C105-C104 | -119.7 |
| O24-W10-O22-W5  | 179.82 | C61-Fe55-C63-H73 | -157.7 | C83-Fe76-C84-H93 | -119.6 | C106-Fe97-C105-H115 | 120.51 |
| O24-W10-O22-P13 | 44.68  | C62-Fe55-C63-C64 | 120.24 | C85-Fe76-C84-C83 | -118.6 | C96-Fe97-C106-C102  | 159.13 |
| O31-W10-O22-W2  | -176   | C62-Fe55-C63-H73 | -119.3 | C85-Fe76-C84-H93 | 121.84 | C96-Fe97-C106-C105  | 40.07  |
| O31-W10-O22-W5  | 94.97  | C64-Fe55-C63-C62 | -120.2 | C75-Fe76-C85-C81 | -158.1 | C96-Fe97-C106-H116  | -81.03 |
| O31-W10-O22-P13 | -40.16 | C64-Fe55-C63-H73 | 120.49 | C75-Fe76-C85-C84 | 81.73  | C98-Fe97-C106-C102  | -59.06 |
| O34-W10-O22-W2  | 90.8   | C54-Fe55-C64-C60 | -43.12 | C75-Fe76-C85-H94 | -38.48 | C98-Fe97-C106-C105  | -178.1 |
| O34-W10-O22-W5  | 1.73   | C54-Fe55-C64-C63 | -163.1 | C77-Fe76-C85-C81 | 161.39 | C98-Fe97-C106-H116  | 60.78  |
| O34-W10-O22-P13 | -133.4 | C54-Fe55-C64-H74 | 77.72  | C77-Fe76-C85-C84 | 41.19  | C99-Fe97-C106-C102  | -177.2 |
| O52-W10-O22-W2  | 47.42  | C56-Fe55-C64-C60 | -77.24 | C77-Fe76-C85-H94 | -79.01 | C99-Fe97-C106-C105  | 63.75  |
| O52-W10-O22-W5  | -41.64 | C56-Fe55-C64-C63 | 162.79 | C78-Fe76-C85-C81 | -114.2 | C99-Fe97-C106-H116  | -57.36 |
| O52-W10-O22-P13 | -176.8 | C56-Fe55-C64-H74 | 43.6   | C78-Fe76-C85-C84 | 125.64 | C100-Fe97-C106-C102 | -137.9 |
| O14-W10-O24-W7  | -128.2 | C57-Fe55-C64-C60 | 167.74 | C78-Fe76-C85-H94 | 5.43   | C100-Fe97-C106-C105 | 103.02 |
| O22-W10-O24-W7  | -56.55 | C57-Fe55-C64-C63 | 47.77  | C79-Fe76-C85-C81 | -72.18 | C100-Fe97-C106-H116 | -18.08 |
| O31-W10-O24-W7  | 28.37  | C57-Fe55-C64-H74 | -71.42 | C79-Fe76-C85-C84 | 167.62 | C101-Fe97-C106-C102 | -93.66 |
| O34-W10-O24-W7  | -52.3  | C58-Fe55-C64-C60 | -159.9 | C79-Fe76-C85-H94 | 47.42  | C101-Fe97-C106-C105 | 147.29 |
| O52-W10-O24-W7  | 129.06 | C58-Fe55-C64-C63 | 80.18  | C80-Fe76-C85-C81 | -31.49 | C101-Fe97-C106-H116 | 26.18  |
| O14-W10-O31-W11 | 37.08  | C58-Fe55-C64-H74 | -39.01 | C80-Fe76-C85-C84 | -151.7 | C102-Fe97-C106-C105 | -119.1 |
| O22-W10-O31-W11 | 51.56  | C59-Fe55-C64-C60 | -119.4 | C80-Fe76-C85-H94 | 88.11  | C102-Fe97-C106-H116 | 119.84 |
| O24-W10-O31-W11 | -32.14 | C59-Fe55-C64-C63 | 120.63 | C81-Fe76-C85-C84 | -120.2 | C103-Fe97-C106-C102 | 38.15  |
| O34-W10-O31-W11 | 122.87 | C59-Fe55-C64-H74 | 1.44   | C81-Fe76-C85-H94 | 119.6  | C103-Fe97-C106-C105 | -80.9  |
| O52-W10-O31-W11 | -134.2 | C60-Fe55-C64-C63 | -120   | C82-Fe76-C85-C81 | 37.14  | C103-Fe97-C106-H116 | 157.99 |
| O14-W10-O34-W5  | 68.58  | C60-Fe55-C64-H74 | 120.84 | C82-Fe76-C85-C84 | -83.06 | C104-Fe97-C106-C102 | 81.98  |

|                 |        |                  |        |                  |        |                     |        |
|-----------------|--------|------------------|--------|------------------|--------|---------------------|--------|
| O22-W10-O34-W5  | -2.74  | C61-Fe55-C64-C60 | 38.54  | C82-Fe76-C85-H94 | 156.74 | C104-Fe97-C106-C105 | -37.07 |
| O24-W10-O34-W5  | -7.19  | C61-Fe55-C64-C63 | -81.42 | C83-Fe76-C85-C81 | 81.73  | C104-Fe97-C106-H116 | -158.2 |
| O31-W10-O34-W5  | -86.31 | C61-Fe55-C64-H74 | 159.39 | C83-Fe76-C85-C84 | -38.47 | C105-Fe97-C106-C102 | 119.06 |
| O52-W10-O34-W5  | 171.45 | C62-Fe55-C64-C60 | 82.99  | C83-Fe76-C85-H94 | -158.7 | C105-Fe97-C106-H116 | -121.1 |
| O30-W11-O27-W7  | 37.97  | C62-Fe55-C64-C63 | -36.98 | C84-Fe76-C85-C81 | 120.2  | C96-C98-C101-Fe97   | 59.59  |
| O31-W11-O27-W7  | -30.07 | C62-Fe55-C64-H74 | -156.2 | C84-Fe76-C85-H94 | -120.2 | C96-C98-C101-C100   | -0.08  |
| O33-W11-O27-W7  | 53.47  | C63-Fe55-C64-C60 | 119.97 | C75-C77-C80-Fe76 | 60.57  | C96-C98-C101-H111   | 179.89 |
| O41-W11-O27-W7  | 126.34 | C63-Fe55-C64-H74 | -119.2 | C75-C77-C80-C79  | -0.27  | Fe97-C98-C101-C100  | -59.67 |
| O49-W11-O27-W7  | -130.7 | C54-C56-C59-Fe55 | 59.8   | C75-C77-C80-H90  | 177.29 | Fe97-C98-C101-H111  | 120.3  |
| O27-W11-O30-W3  | 20.11  | C54-C56-C59-C58  | 0.11   | Fe76-C77-C80-C79 | -60.84 | H108-C98-C101-Fe97  | -116.9 |
| O31-W11-O30-W3  | 87.58  | C54-C56-C59-H69  | 175.99 | Fe76-C77-C80-H90 | 116.72 | H108-C98-C101-C100  | -176.6 |
| O33-W11-O30-W3  | 3.86   | Fe55-C56-C59-C58 | -59.69 | H87-C77-C80-Fe76 | -118.7 | H108-C98-C101-H111  | 3.4    |
| O41-W11-O30-W3  | -69.07 | Fe55-C56-C59-H69 | 116.19 | H87-C77-C80-C79  | -179.5 | C96-C99-C100-Fe97   | -61.53 |
| O49-W11-O30-W3  | -171.1 | H66-C56-C59-Fe55 | -116.5 | H87-C77-C80-H90  | -1.95  | C96-C99-C100-C101   | -0.54  |
| O27-W11-O31-W10 | 32.64  | H66-C56-C59-C58  | -176.2 | C75-C78-C79-Fe76 | -57.99 | C96-C99-C100-H110   | 179.23 |
| O30-W11-O31-W10 | -125   | H66-C56-C59-H69  | -0.34  | C75-C78-C79-C80  | -0.22  | Fe97-C99-C100-C101  | 60.99  |
| O33-W11-O31-W10 | -52.79 | C54-C57-C58-Fe55 | -58.68 | C75-C78-C79-H89  | -176.9 | Fe97-C99-C100-H110  | -119.2 |
| O41-W11-O31-W10 | -47.54 | C54-C57-C58-C59  | -0.48  | Fe76-C78-C79-C80 | 57.77  | H109-C99-C100-Fe97  | 118.34 |
| O49-W11-O31-W10 | 134.95 | C54-C57-C58-H68  | -176.3 | Fe76-C78-C79-H89 | -118.9 | H109-C99-C100-C101  | 179.33 |
| O27-W11-O33-W3  | -175.8 | Fe55-C57-C58-C59 | 58.2   | H88-C78-C79-Fe76 | 120.23 | H109-C99-C100-H110  | -0.9   |
| O27-W11-O33-P13 | -39.65 | Fe55-C57-C58-H68 | -117.7 | H88-C78-C79-C80  | 177.99 | Fe97-C100-C101-C98  | 61.98  |
| O30-W11-O33-W3  | -2.41  | H67-C57-C58-Fe55 | 119.79 | H88-C78-C79-H89  | 1.31   | Fe97-C100-C101-H111 | -118   |
| O30-W11-O33-P13 | 133.73 | H67-C57-C58-C59  | 177.99 | Fe76-C79-C80-C77 | 58.92  | C99-C100-C101-Fe97  | -61.59 |
| O31-W11-O33-W3  | -91.33 | H67-C57-C58-H68  | 2.13   | Fe76-C79-C80-H90 | -118.7 | C99-C100-C101-C98   | 0.39   |
| O31-W11-O33-P13 | 44.81  | Fe55-C58-C59-C56 | 57.62  | C78-C79-C80-Fe76 | -58.61 | C99-C100-C101-H111  | -179.6 |
| O41-W11-O33-W3  | 90.9   | Fe55-C58-C59-H69 | -118.3 | C78-C79-C80-C77  | 0.31   | H110-C100-C101-Fe97 | 118.64 |
| O41-W11-O33-P13 | -133   | C57-C58-C59-Fe55 | -57.4  | C78-C79-C80-H90  | -177.3 | H110-C100-C101-C98  | -179.4 |
| O49-W11-O33-W3  | 31.13  | C57-C58-C59-C56  | 0.23   | H89-C79-C80-Fe76 | 118.09 | H110-C100-C101-H111 | 0.65   |
| O49-W11-O33-P13 | 167.27 | C57-C58-C59-H69  | -175.7 | H89-C79-C80-C77  | 177.01 | Fe97-C102-C103-C104 | -60.94 |

|                 |        |                  |        |                  |        |                     |        |
|-----------------|--------|------------------|--------|------------------|--------|---------------------|--------|
| O27-W11-O41-W12 | -87.28 | H68-C58-C59-Fe55 | 118.49 | H89-C79-C80-H90  | -0.59  | Fe97-C102-C103-H113 | 120.11 |
| O30-W11-O41-W12 | 68.48  | H68-C58-C59-C56  | 176.12 | Fe76-C81-C82-C83 | -59.25 | C106-C102-C103-Fe97 | 60.41  |
| O31-W11-O41-W12 | -8.72  | H68-C58-C59-H69  | 0.16   | Fe76-C81-C82-H91 | 118.49 | C106-C102-C103-C104 | -0.53  |
| O33-W11-O41-W12 | -3.27  | Fe55-C60-C61-C62 | -60.82 | C85-C81-C82-Fe76 | 58.84  | C106-C102-C103-H113 | -179.5 |
| O49-W11-O41-W12 | 168.78 | Fe55-C60-C61-H71 | 119.06 | C85-C81-C82-C83  | -0.4   | H112-C102-C103-Fe97 | -120.7 |
| O40-W12-O35-W4  | 130.61 | C64-C60-C61-Fe55 | 61.25  | C85-C81-C82-H91  | 177.33 | H112-C102-C103-C104 | 178.4  |
| O41-W12-O35-W4  | 46.21  | C64-C60-C61-C62  | 0.42   | H95-C81-C82-Fe76 | -118   | H112-C102-C103-H113 | -0.54  |
| O45-W12-O35-W4  | -126   | C64-C60-C61-H71  | -179.7 | H95-C81-C82-C83  | -177.3 | Fe97-C102-C106-C105 | 60.15  |
| O47-W12-O35-W4  | -24.09 | H70-C60-C61-Fe55 | -116.5 | H95-C81-C82-H91  | 0.46   | Fe97-C102-C106-H116 | -116.3 |
| O35-W12-O40-W3  | -86.83 | H70-C60-C61-C62  | -177.3 | Fe76-C81-C85-C84 | 57.79  | C103-C102-C106-Fe97 | -59.72 |
| O41-W12-O40-W3  | 66.61  | H70-C60-C61-H71  | 2.56   | Fe76-C81-C85-H94 | -119.9 | C103-C102-C106-C105 | 0.43   |
| O45-W12-O40-W3  | 171.58 | Fe55-C60-C64-C63 | 59.28  | C82-C81-C85-Fe76 | -57.6  | C103-C102-C106-H116 | -176.1 |
| O47-W12-O40-W3  | -8.86  | Fe55-C60-C64-H74 | -115.6 | C82-C81-C85-C84  | 0.19   | H112-C102-C106-Fe97 | 121.35 |
| O35-W12-O41-W11 | 17.69  | C61-C60-C64-Fe55 | -59.48 | C82-C81-C85-H94  | -177.5 | H112-C102-C106-C105 | -178.5 |
| O40-W12-O41-W11 | -67.3  | C61-C60-C64-C63  | -0.2   | H95-C81-C85-Fe76 | 119.26 | H112-C102-C106-H116 | 5.02   |
| O45-W12-O41-W11 | -170.2 | C61-C60-C64-H74  | -175.1 | H95-C81-C85-C84  | 177.06 | Fe97-C103-C104-C105 | -59.83 |
| O47-W12-O41-W11 | 87.72  | H70-C60-C64-Fe55 | 118.23 | H95-C81-C85-H94  | -0.65  | Fe97-C103-C104-H114 | 116.73 |
| O35-W12-O47-W6  | 30.11  | H70-C60-C64-C63  | 177.51 | Fe76-C82-C83-C84 | -60.75 | C102-C103-C104-Fe97 | 60.25  |
| O40-W12-O47-W6  | -49.03 | H70-C60-C64-H74  | 2.61   | Fe76-C82-C83-H92 | 118.32 | C102-C103-C104-C105 | 0.42   |
| O41-W12-O47-W6  | -124.8 | Fe55-C61-C62-C63 | -61.07 | C81-C82-C83-Fe76 | 61.21  | C102-C103-C104-H114 | 176.98 |
| O45-W12-O47-W6  | 130.53 | Fe55-C61-C62-H72 | 116.91 | C81-C82-C83-C84  | 0.46   | H113-C103-C104-Fe97 | -120.8 |
| O33-P13-O22-W2  | 178.2  | C60-C61-C62-Fe55 | 60.58  | C81-C82-C83-H92  | 179.53 | H113-C103-C104-C105 | 179.38 |
| O33-P13-O22-W5  | -61.13 | C60-C61-C62-C63  | -0.48  | H91-C82-C83-Fe76 | -116.5 | H113-C103-C104-H114 | -4.06  |
| O33-P13-O22-W10 | 58.47  | C60-C61-C62-H72  | 177.5  | H91-C82-C83-C84  | -177.2 | Fe97-C104-C105-C106 | -58.88 |
| O37-P13-O22-W2  | -61.41 | H71-C61-C62-Fe55 | -119.3 | H91-C82-C83-H92  | 1.87   | Fe97-C104-C105-H115 | 116.15 |
| O37-P13-O22-W5  | 59.26  | H71-C61-C62-C63  | 179.63 | Fe76-C83-C84-C85 | -60.99 | C103-C104-C105-Fe97 | 58.72  |
| O37-P13-O22-W10 | 178.86 | H71-C61-C62-H72  | -2.38  | Fe76-C83-C84-H93 | 118.75 | C103-C104-C105-C106 | -0.15  |
| O42-P13-O22-W2  | 58.01  | Fe55-C62-C63-C64 | -58.75 | C82-C83-C84-Fe76 | 60.65  | C103-C104-C105-H115 | 174.87 |
| O42-P13-O22-W5  | 178.68 | Fe55-C62-C63-H73 | 116.26 | C82-C83-C84-C85  | -0.34  | H114-C104-C105-Fe97 | -117.9 |
| O42-P13-O22-W10 | -61.72 | C61-C62-C63-Fe55 | 59.11  | C82-C83-C84-H93  | 179.4  | H114-C104-C105-C106 | -176.7 |
| O22-P13-O33-W3  | 59.06  | C61-C62-C63-C64  | 0.36   | H92-C83-C84-Fe76 | -118.4 | H114-C104-C105-H115 | -1.71  |

|                 |        |                  |        |                  |        |                     |        |
|-----------------|--------|------------------|--------|------------------|--------|---------------------|--------|
| O22-P13-O33-W11 | -62.59 | C61-C62-C63-H73  | 175.37 | H92-C83-C84-C85  | -179.4 | Fe97-C105-C106-C102 | -59.16 |
| O37-P13-O33-W3  | -61.11 | H72-C62-C63-Fe55 | -118.9 | H92-C83-C84-H93  | 0.32   | Fe97-C105-C106-H116 | 117.31 |
| O37-P13-O33-W11 | 177.23 | H72-C62-C63-C64  | -177.7 | Fe76-C84-C85-C81 | -59.03 | C104-C105-C106-Fe97 | 58.98  |
| O42-P13-O33-W3  | 179.44 | H72-C62-C63-H73  | -2.65  | Fe76-C84-C85-H94 | 118.64 | C104-C105-C106-C102 | -0.17  |
| O42-P13-O33-W11 | 57.79  | Fe55-C63-C64-C60 | -57.9  | C83-C84-C85-Fe76 | 59.12  | C104-C105-C106-H116 | 176.29 |
| O22-P13-O37-W1  | -61.8  | Fe55-C63-C64-H74 | 117.15 | C83-C84-C85-C81  | 0.09   | H115-C105-C106-Fe97 | -116   |
| O33-P13-O37-W1  | 58.79  | C62-C63-C64-Fe55 | 57.8   | C83-C84-C85-H94  | 177.76 | H115-C105-C106-C102 | -175.2 |
| O42-P13-O37-W1  | 178.41 | C62-C63-C64-C60  | -0.1   | H93-C84-C85-Fe76 | -120.6 | H115-C105-C106-H116 | 1.31   |

\*torsional angles closer to 0° or 180°.

**Table S11** Torsional angles between atoms in FcPMo optimized structure in aqueous phase

| Atom1            | Torsional angle (deg.) | Atom1              | Torsional angle (deg.) | Atom1            | Torsional angle (deg.) | Atom1             | Torsional angle (deg.) |
|------------------|------------------------|--------------------|------------------------|------------------|------------------------|-------------------|------------------------|
| O18-Mo1-O19-Mo3  | -141.7                 | O33-Mo11-O31-Mo10  | -52.82                 | C54-C56-C59-H69  | 176.05                 | Fe76-C81-C85-H94  | -120.04                |
| O21-Mo1-O19-Mo3  | -37.65                 | O41-Mo11-O31-Mo10  | -54.74                 | Fe55-C56-C59-C58 | -59.89                 | C82-C81-C85-Fe76  | -57.71                 |
| O26-Mo1-O19-Mo3  | 119.96                 | O49-Mo11-O31-Mo10  | 136.36                 | Fe55-C56-C59-H69 | 116.25                 | C82-C81-C85-C84*  | 0.07                   |
| O37-Mo1-O19-Mo3  | 46.3                   | O27-Mo11-O33-Mo3   | -171.31                | H66-C56-C59-Fe55 | -116.57                | C82-C81-C85-H94   | -177.76                |
| O39-Mo1-O19-Mo3  | 23.46                  | O27-Mo11-O33-Mo12  | 99.02                  | H66-C56-C59-C58  | -176.46                | H95-C81-C85-Fe76  | 118.96                 |
| O18-Mo1-O21-Mo5  | 143.16                 | O27-Mo11-O33-P13   | -35.37                 | H66-C56-C59-H69* | -0.32                  | H95-C81-C85-C84   | 176.74                 |
| O19-Mo1-O21-Mo5  | 37.52                  | O30-Mo11-O33-Mo3   | -3.11                  | C54-C57-C58-Fe55 | -58.51                 | H95-C81-C85-H94   | -1.09                  |
| O26-Mo1-O21-Mo5  | -54.08                 | O30-Mo11-O33-Mo12  | -92.78                 | C54-C57-C58-C59* | -0.4                   | Fe76-C82-C83-C84  | -60.75                 |
| O37-Mo1-O21-Mo5  | -51.18                 | O30-Mo11-O33-P13   | 132.84                 | C54-C57-C58-H68  | -176.19                | Fe76-C82-C83-H92  | 118.44                 |
| O39-Mo1-O21-Mo5  | -123.45                | O31-Mo11-O33-Mo3   | -88.2                  | Fe55-C57-C58-C59 | 58.1                   | C81-C82-C83-Fe76  | 61.14                  |
| O18-Mo1-O26-Mo4  | 161.47                 | O31-Mo11-O33-Mo12  | -177.87                | Fe55-C57-C58-H68 | -117.69                | C81-C82-C83-C84*  | 0.39                   |
| O19-Mo1-O26-Mo4  | -91.28                 | O31-Mo11-O33-P13   | 47.75                  | H67-C57-C58-Fe55 | 120.19                 | C81-C82-C83-H92*  | 179.59                 |
| O21-Mo1-O26-Mo4  | -1.79                  | O41-Mo11-O33-Mo3   | 90.97                  | H67-C57-C58-C59  | 178.29                 | H91-C82-C83-Fe76  | -116.64                |
| O37-Mo1-O26-Mo4  | -4.79                  | O41-Mo11-O33-Mo12  | 1.3                    | H67-C57-C58-H68  | 2.5                    | H91-C82-C83-C84   | -177.39                |
| O39-Mo1-O26-Mo4  | 67.09                  | O41-Mo11-O33-P13   | -133.09                | Fe55-C58-C59-C56 | 57.86                  | H91-C82-C83-H92   | 1.8                    |
| O18-Mo1-O37-Mo4  | -52.92                 | O49-Mo11-O33-Mo3   | 19.07                  | Fe55-C58-C59-H69 | -118.34                | Fe76-C83-C84-C85  | -60.96                 |
| O18-Mo1-O37-Mo8  | 36.19                  | O49-Mo11-O33-Mo12  | -70.6                  | C57-C58-C59-Fe55 | -57.55                 | Fe76-C83-C84-H93  | 118.56                 |
| O18-Mo1-O37-P13  | 171.47                 | O49-Mo11-O33-P13   | 155.02                 | C57-C58-C59-C56* | 0.31                   | C82-C83-C84-Fe76  | 60.61                  |
| O19-Mo1-O37-Mo4  | 99.18                  | O27-Mo11-O41-Mo12  | -85.83                 | C57-C58-C59-H69  | -175.89                | C82-C83-C84-C85   | -0.35                  |
| O19-Mo1-O37-Mo8  | -171.71                | O30-Mo11-O41-Mo12  | 68.57                  | H68-C58-C59-Fe55 | 118.28                 | C82-C83-C84-H93*  | 179.16                 |
| O19-Mo1-O37-P13  | -36.43                 | O31-Mo11-O41-Mo12* | -0.06                  | H68-C58-C59-C56  | 176.14                 | H92-C83-C84-Fe76  | -118.59                |
| O21-Mo1-O37-Mo4  | -175.88                | O33-Mo11-O41-Mo12  | -2.05                  | H68-C58-C59-H69* | -0.06                  | H92-C83-C84-C85*  | -179.55                |
| O21-Mo1-O37-Mo8  | -86.78                 | O49-Mo11-O41-Mo12  | 168.72                 | Fe55-C60-C61-C62 | -60.85                 | H92-C83-C84-H93*  | -0.03                  |
| O21-Mo1-O37-P13  | 48.51                  | O35-Mo12-O33-Mo3   | 98.81                  | Fe55-C60-C61-H71 | 118.75                 | Fe76-C84-C85-C81  | -58.92                 |
| O26-Mo1-O37-Mo4  | 2.98                   | O35-Mo12-O33-Mo11  | -171.68                | C64-C60-C61-Fe55 | 61.14                  | Fe76-C84-C85-H94  | 118.87                 |
| O26-Mo1-O37-Mo8  | 92.08                  | O35-Mo12-O33-P13   | -37.07                 | C64-C60-C61-C62* | 0.29                   | C83-C84-C85-Fe76  | 59.1                   |
| O26-Mo1-O37-P13  | -132.63                | O40-Mo12-O33-Mo3   | 1.09                   | C64-C60-C61-H71* | 179.89                 | C83-C84-C85-C81*  | 0.18                   |
| O39-Mo1-O37-Mo4  | -89.53                 | O40-Mo12-O33-Mo11  | 90.59                  | H70-C60-C61-Fe55 | -116.37                | C83-C84-C85-H94   | 177.97                 |
| O39-Mo1-O37-Mo8* | -0.42                  | O40-Mo12-O33-P13   | -134.8                 | H70-C60-C61-C62  | -177.22                | H93-C84-C85-Fe76  | -120.41                |
| O39-Mo1-O37-P13  | 134.86                 | O41-Mo12-O33-Mo3   | -90.72                 | H70-C60-C61-H71  | 2.38                   | H93-C84-C85-C81*  | -179.33                |
| O18-Mo1-O39-Mo8  | -169.46                | O41-Mo12-O33-Mo11  | -1.22                  | Fe55-C60-C64-C63 | 59.34                  | H93-C84-C85-H94   | -1.55                  |
| O19-Mo1-O39-Mo8  | 24.82                  | O41-Mo12-O33-P13   | 133.39                 | Fe55-C60-C64-H74 | -115.98                | C98-C96-Fe97-C99  | 120.22                 |
| O21-Mo1-O39-Mo8  | 85.95                  | O45-Mo12-O33-Mo3   | -53.66                 | C61-C60-C64-Fe55 | -59.44                 | C98-C96-Fe97-C100 | 81.65                  |
| O26-Mo1-O39-Mo8  | -73.23                 | O45-Mo12-O33-Mo11  | 35.84                  | C61-C60-C64-C63* | -0.09                  | C98-C96-Fe97-C101 | 36.99                  |
| O37-Mo1-O39-Mo8* | 0.72                   | O45-Mo12-O33-P13   | 170.45                 | C61-C60-C64-H74  | -175.42                | C98-C96-Fe97-C102 | -56.82                 |
| O20-Mo2-O14-Mo10 | -86.31                 | O47-Mo12-O33-Mo3   | -175.24                | H70-C60-C64-Fe55 | 118.04                 | C98-C96-Fe97-C103 | -94.18                 |
| O22-Mo2-O14-Mo10 | -3.28                  | O47-Mo12-O33-Mo11  | -85.73                 | H70-C60-C64-C63  | 177.39                 | C98-C96-Fe97-C104 | -137.87                |

|                  |         |                   |         |                  |         |                    |         |
|------------------|---------|-------------------|---------|------------------|---------|--------------------|---------|
| O25-Mo2-O14-Mo10 | 66.73   | O47-Mo12-O33-P13  | 48.88   | H70-C60-C64-H74  | 2.07    | C98-C96-Fe97-C105  | -176.74 |
| O38-Mo2-O14-Mo10 | -2.2    | O33-Mo12-O35-Mo4  | 51.42   | Fe55-C61-C62-C63 | -60.95  | C98-C96-Fe97-C106  | 147.71  |
| O48-Mo2-O14-Mo10 | 168.38  | O40-Mo12-O35-Mo4  | 121.97  | Fe55-C61-C62-H72 | 117     | C99-C96-Fe97-C98   | -120.22 |
| O14-Mo2-O20-Mo9  | 119.25  | O41-Mo12-O35-Mo4  | 30.35   | C60-C61-C62-Fe55 | 60.57   | C99-C96-Fe97-C100  | -38.57  |
| O22-Mo2-O20-Mo9  | 47.2    | O45-Mo12-O35-Mo4  | -133.08 | C60-C61-C62-C63* | -0.38   | C99-C96-Fe97-C101  | -83.23  |
| O25-Mo2-O20-Mo9  | 22.19   | O47-Mo12-O35-Mo4  | -31.12  | C60-C61-C62-H72  | 177.57  | C99-C96-Fe97-C102  | -177.04 |
| O38-Mo2-O20-Mo9  | -36.02  | O33-Mo12-O40-Mo3  | -1.67   | H71-C61-C62-Fe55 | -119.02 | C99-C96-Fe97-C103  | 145.6   |
| O48-Mo2-O20-Mo9  | -134.41 | O35-Mo12-O40-Mo3  | -85.43  | H71-C61-C62-C63  | -179.97 | C99-C96-Fe97-C104  | 101.91  |
| O14-Mo2-O22-Mo5  | 92.07   | O41-Mo12-O40-Mo3  | 68.83   | H71-C61-C62-H72  | -2.02   | C99-C96-Fe97-C105  | 63.04   |
| O14-Mo2-O22-Mo10 | 2.09    | O45-Mo12-O40-Mo3  | 170.33  | Fe55-C62-C63-C64 | -58.66  | C99-C96-Fe97-C106  | 27.49   |
| O14-Mo2-O22-P13  | -132.1  | O47-Mo12-O40-Mo3  | 6.42    | Fe55-C62-C63-H73 | 116.61  | H107-C96-Fe97-C98  | 120.63  |
| O20-Mo2-O22-Mo5  | -170.74 | O33-Mo12-O41-Mo11 | 2.05    | C61-C62-C63-Fe55 | 58.98   | H107-C96-Fe97-C99  | -119.15 |
| O20-Mo2-O22-Mo10 | 99.27   | O35-Mo12-O41-Mo11 | 24.49   | C61-C62-C63-C64* | 0.33    | H107-C96-Fe97-C100 | -157.72 |
| O20-Mo2-O22-P13  | -34.92  | O40-Mo12-O41-Mo11 | -69.58  | C61-C62-C63-H73  | 175.59  | H107-C96-Fe97-C101 | 157.61  |
| O25-Mo2-O22-Mo5  | -2.56   | O45-Mo12-O41-Mo11 | -172.07 | H72-C62-C63-Fe55 | -119.01 | H107-C96-Fe97-C102 | 63.81   |
| O25-Mo2-O22-Mo10 | -92.55  | O47-Mo12-O41-Mo11 | 86.61   | H72-C62-C63-C64  | -177.67 | H107-C96-Fe97-C103 | 26.44   |
| O25-Mo2-O22-P13  | 133.26  | O33-Mo12-O47-Mo6  | -56.3   | H72-C62-C63-H73  | -2.4    | H107-C96-Fe97-C104 | -17.24  |
| O38-Mo2-O22-Mo5  | -87.47  | O35-Mo12-O47-Mo6  | 30.35   | Fe55-C63-C64-C60 | -57.92  | H107-C96-Fe97-C105 | -56.11  |
| O38-Mo2-O22-Mo10 | -177.46 | O40-Mo12-O47-Mo6  | -64.02  | Fe55-C63-C64-H74 | 117.54  | H107-C96-Fe97-C106 | -91.66  |
| O38-Mo2-O22-P13  | 48.35   | O41-Mo12-O47-Mo6  | -127.07 | C62-C63-C64-Fe55 | 57.77   | Fe97-C96-C98-C101  | -57.41  |
| O48-Mo2-O22-Mo5  | 19.94   | O45-Mo12-O47-Mo6  | 132.03  | C62-C63-C64-C60* | -0.14   | Fe97-C96-C98-H108  | 119.06  |
| O48-Mo2-O22-Mo10 | -70.05  | O33-P13-O22-Mo2   | 175.53  | C62-C63-C64-H74  | 175.31  | C99-C96-C98-Fe97   | 57.34   |
| O48-Mo2-O22-P13  | 155.76  | O33-P13-O22-Mo5   | -63.63  | H73-C63-C64-Fe55 | -117.48 | C99-C96-C98-C101*  | -0.07   |
| O14-Mo2-O25-Mo5  | -68.07  | O33-P13-O22-Mo10  | 56.57   | H73-C63-C64-C60  | -175.4  | C99-C96-C98-H108   | 176.4   |
| O20-Mo2-O25-Mo5  | 30.64   | O37-P13-O22-Mo2   | -63.86  | H73-C63-C64-H74* | 0.06    | H107-C96-C98-Fe97  | -119.77 |
| O22-Mo2-O25-Mo5  | 4.1     | O37-P13-O22-Mo5   | 56.97   | C77-C75-Fe76-C78 | 118.62  | H107-C96-C98-C101  | -177.18 |
| O38-Mo2-O25-Mo5  | 88.83   | O37-P13-O22-Mo10  | 177.18  | C77-C75-Fe76-C79 | 81.84   | H107-C96-C98-H108* | -0.72   |
| O48-Mo2-O25-Mo5  | -172.59 | O42-P13-O22-Mo2   | 55.86   | C77-C75-Fe76-C80 | 38.52   | Fe97-C96-C99-C100  | 59.17   |
| O14-Mo2-O38-Mo8  | -54.52  | O42-P13-O22-Mo5   | 176.69  | C77-C75-Fe76-C81 | 167.37  | Fe97-C96-C99-H109  | -120.06 |
| O20-Mo2-O38-Mo8  | 32.35   | O42-P13-O22-Mo10  | -63.1   | C77-C75-Fe76-C82 | -33.26  | C98-C96-C99-Fe97   | -58.76  |
| O22-Mo2-O38-Mo8  | -53.49  | O22-P13-O33-Mo3   | 55.41   | C77-C75-Fe76-C83 | -71.06  | C98-C96-C99-C100*  | 0.41    |
| O25-Mo2-O38-Mo8  | -124.62 | O22-P13-O33-Mo11  | -65.33  | C77-C75-Fe76-C84 | -113.97 | C98-C96-C99-H109   | -178.82 |
| O48-Mo2-O38-Mo8  | 134.73  | O22-P13-O33-Mo12  | 176.02  | C77-C75-Fe76-C85 | -156.67 | H107-C96-C99-Fe97  | 118.35  |
| O19-Mo3-O17-Mo5  | -32.44  | O37-P13-O33-Mo3   | -65.1   | C78-C75-Fe76-C77 | -118.62 | H107-C96-C99-C100  | 177.52  |
| O30-Mo3-O17-Mo5  | 123.1   | O37-P13-O33-Mo11  | 174.17  | C78-C75-Fe76-C79 | -36.78  | H107-C96-C99-H109  | -1.71   |
| O33-Mo3-O17-Mo5  | 50.6    | O37-P13-O33-Mo12  | 55.52   | C78-C75-Fe76-C80 | -80.1   | C96-Fe97-C98-C101  | 120.46  |
| O40-Mo3-O17-Mo5  | 29.45   | O42-P13-O33-Mo3   | 175.18  | C78-C75-Fe76-C81 | 48.74   | C96-Fe97-C98-H108  | -120.11 |
| O46-Mo3-O17-Mo5  | -135.76 | O42-P13-O33-Mo11  | 54.45   | C78-C75-Fe76-C82 | -151.88 | C99-Fe97-C98-C96   | -37.09  |
| O17-Mo3-O19-Mo1  | 36.63   | O42-P13-O33-Mo12  | -64.2   | C78-C75-Fe76-C83 | 170.31  | C99-Fe97-C98-C101  | 83.37   |
| O30-Mo3-O19-Mo1  | -52.31  | O22-P13-O37-Mo1   | -65.08  | C78-C75-Fe76-C84 | 127.41  | C99-Fe97-C98-H108  | -157.2  |
| O33-Mo3-O19-Mo1  | -49.57  | O22-P13-O37-Mo4   | 175.22  | C78-C75-Fe76-C85 | 84.71   | C100-Fe97-C98-C96  | -81.78  |
| O40-Mo3-O19-Mo1  | -121.61 | O22-P13-O37-Mo8   | 55.12   | H86-C75-Fe76-C77 | 119.6   | C100-Fe97-C98-C101 | 38.68   |
| O46-Mo3-O19-Mo1  | 141.15  | O33-P13-O37-Mo1   | 55.82   | H86-C75-Fe76-C78 | -121.77 | C100-Fe97-C98-H108 | 158.1   |

|                  |         |                   |         |                  |         |                    |         |
|------------------|---------|-------------------|---------|------------------|---------|--------------------|---------|
| O17-Mo3-O30-Mo11 | -88.84  | O33-P13-O37-Mo4   | -63.88  | H86-C75-Fe76-C79 | -158.56 | C101-Fe97-C98-C96  | -120.46 |
| O19-Mo3-O30-Mo11 | -2.12   | O33-P13-O37-Mo8   | 176.02  | H86-C75-Fe76-C80 | 158.12  | C101-Fe97-C98-H108 | 119.43  |
| O33-Mo3-O30-Mo11 | -4.96   | O42-P13-O37-Mo1   | 175.32  | H86-C75-Fe76-C81 | -73.03  | C102-Fe97-C98-C96  | 148.2   |
| O40-Mo3-O30-Mo11 | 66.49   | O42-P13-O37-Mo4   | 55.62   | H86-C75-Fe76-C82 | 86.35   | C102-Fe97-C98-C101 | -91.34  |
| O46-Mo3-O30-Mo11 | 164.66  | O42-P13-O37-Mo8   | -64.48  | H86-C75-Fe76-C83 | 48.54   | C102-Fe97-C98-H108 | 28.09   |
| O17-Mo3-O33-Mo11 | 99.45   | O22-P13-O42-Mo6   | 176.42  | H86-C75-Fe76-C84 | 5.64    | C103-Fe97-C98-C96  | 103.52  |
| O17-Mo3-O33-Mo12 | -171.87 | O22-P13-O42-Mo7   | 55.88   | H86-C75-Fe76-C85 | -37.07  | C103-Fe97-C98-C101 | -136.01 |
| O17-Mo3-O33-P13  | -36.35  | O22-P13-O42-Mo9   | -64.09  | Fe76-C75-C77-C80 | -60.82  | C103-Fe97-C98-H108 | -16.59  |
| O19-Mo3-O33-Mo11 | -175.64 | O33-P13-O42-Mo6   | 56.07   | Fe76-C75-C77-H87 | 118.47  | C104-Fe97-C98-C96  | 63.55   |
| O19-Mo3-O33-Mo12 | -86.96  | O33-P13-O42-Mo7   | -64.47  | C78-C75-C77-Fe76 | 60.95   | C104-Fe97-C98-C101 | -175.99 |
| O19-Mo3-O33-P13  | 48.55   | O33-P13-O42-Mo9   | 175.56  | C78-C75-C77-C80  | 0.13    | C104-Fe97-C98-H108 | -56.56  |
| O30-Mo3-O33-Mo11 | 3.17    | O37-P13-O42-Mo6   | -63.81  | C78-C75-C77-H87* | 179.42  | C105-Fe97-C98-C96  | 20.67   |
| O30-Mo3-O33-Mo12 | 91.85   | O37-P13-O42-Mo7   | 175.65  | H86-C75-C77-Fe76 | -119.51 | C105-Fe97-C98-C101 | 141.13  |
| O30-Mo3-O33-P13  | -132.63 | O37-P13-O42-Mo9   | 55.68   | H86-C75-C77-C80* | 179.68  | C105-Fe97-C98-H108 | -99.44  |
| O40-Mo3-O33-Mo11 | -89.7   | C56-C54-Fe55-C57  | 117.81  | H86-C75-C77-H87  | -1.03   | C106-Fe97-C98-C96  | -173.38 |
| O40-Mo3-O33-Mo12 | -1.02   | C56-C54-Fe55-C58  | 80.67   | Fe76-C75-C78-C79 | 59.41   | C106-Fe97-C98-C101 | -52.92  |
| O40-Mo3-O33-P13  | 134.5   | C56-C54-Fe55-C59  | 37.97   | Fe76-C75-C78-H88 | -118.72 | C106-Fe97-C98-H108 | 66.51   |
| O46-Mo3-O33-Mo11 | -51.26  | C56-C54-Fe55-C60  | -77.69  | C77-C75-C78-Fe76 | -59.33  | C96-Fe97-C99-C100  | -118.57 |
| O46-Mo3-O33-Mo12 | 37.42   | C56-C54-Fe55-C61  | -120.21 | C77-C75-C78-C79* | 0.07    | C96-Fe97-C99-H109  | 121.02  |
| O46-Mo3-O33-P13  | 172.94  | C56-C54-Fe55-C62  | -162.03 | C77-C75-C78-H88  | -178.06 | C98-Fe97-C99-C96   | 36.49   |
| O17-Mo3-O40-Mo12 | 24.02   | C56-C54-Fe55-C63  | 167.71  | H86-C75-C78-Fe76 | 121.12  | C98-Fe97-C99-C100  | -82.08  |
| O19-Mo3-O40-Mo12 | 86.01   | C56-C54-Fe55-C64  | -46.31  | H86-C75-C78-C79* | -179.47 | C98-Fe97-C99-H109  | 157.51  |
| O30-Mo3-O40-Mo12 | -71.24  | C57-C54-Fe55-C56  | -117.81 | H86-C75-C78-H88  | 2.4     | C100-Fe97-C99-C96  | 118.57  |
| O33-Mo3-O40-Mo12 | 1.72    | C57-C54-Fe55-C58  | -37.14  | C75-Fe76-C77-C80 | 117.97  | C100-Fe97-C99-H109 | -120.41 |
| O46-Mo3-O40-Mo12 | -170.38 | C57-C54-Fe55-C59  | -79.85  | C75-Fe76-C77-H87 | -120.67 | C101-Fe97-C99-C96  | 79.91   |
| O29-Mo4-O26-Mo1  | 34.04   | C57-C54-Fe55-C60  | 164.49  | C78-Fe76-C77-C75 | -37.76  | C101-Fe97-C99-C100 | -38.66  |
| O35-Mo4-O26-Mo1  | 88.73   | C57-C54-Fe55-C61  | 121.98  | C78-Fe76-C77-C80 | 80.22   | C101-Fe97-C99-H109 | -159.07 |
| O36-Mo4-O26-Mo1  | -67.53  | C57-C54-Fe55-C62  | 80.15   | C78-Fe76-C77-H87 | -158.43 | C102-Fe97-C99-C96  | 163.7   |
| O37-Mo4-O26-Mo1  | 4.64    | C57-C54-Fe55-C63  | 49.9    | C79-Fe76-C77-C75 | -80.63  | C102-Fe97-C99-C100 | 45.13   |
| O51-Mo4-O26-Mo1  | -171.23 | C57-C54-Fe55-C64  | -164.13 | C79-Fe76-C77-C80 | 37.34   | C102-Fe97-C99-H109 | -75.29  |
| O26-Mo4-O29-Mo6  | 18.87   | H65-C54-Fe55-C56  | 120.29  | C79-Fe76-C77-H87 | 158.7   | C103-Fe97-C99-C96  | -59.66  |
| O35-Mo4-O29-Mo6  | -35.81  | H65-C54-Fe55-C57  | -121.9  | C80-Fe76-C77-C75 | -117.97 | C103-Fe97-C99-C100 | -178.23 |
| O36-Mo4-O29-Mo6  | 118.47  | H65-C54-Fe55-C58  | -159.04 | C80-Fe76-C77-H87 | 121.35  | C103-Fe97-C99-H109 | 61.36   |
| O37-Mo4-O29-Mo6  | 46.47   | H65-C54-Fe55-C59  | 158.25  | C81-Fe76-C77-C75 | -163.42 | C104-Fe97-C99-C96  | -94.94  |
| O51-Mo4-O29-Mo6  | -135.64 | H65-C54-Fe55-C60  | 42.6    | C81-Fe76-C77-C80 | -45.45  | C104-Fe97-C99-C100 | 146.49  |
| O26-Mo4-O35-Mo12 | -125.56 | H65-C54-Fe55-C61* | 0.08    | C81-Fe76-C77-H87 | 75.91   | C104-Fe97-C99-H109 | 26.07   |
| O29-Mo4-O35-Mo12 | 32.03   | H65-C54-Fe55-C62  | -41.75  | C82-Fe76-C77-C75 | 168.97  | C105-Fe97-C99-C96  | -137.59 |
| O36-Mo4-O35-Mo12 | -56.6   | H65-C54-Fe55-C63  | -72     | C82-Fe76-C77-C80 | -73.06  | C105-Fe97-C99-C100 | 103.84  |
| O37-Mo4-O35-Mo12 | -54.51  | H65-C54-Fe55-C64  | 73.98   | C82-Fe76-C77-H87 | 48.3    | C105-Fe97-C99-H109 | -16.58  |
| O51-Mo4-O35-Mo12 | 134.36  | Fe55-C54-C56-C59  | -61.5   | C83-Fe76-C77-C75 | 127.73  | C106-Fe97-C99-C96  | -175.61 |
| O26-Mo4-O36-Mo8  | 66.9    | Fe55-C54-C56-H66  | 114.88  | C83-Fe76-C77-C80 | -114.3  | C106-Fe97-C99-C100 | 65.82   |
| O29-Mo4-O36-Mo8  | -85.96  | C57-C54-C56-Fe55  | 61.34   | C83-Fe76-C77-H87 | 7.05    | C106-Fe97-C99-H109 | -54.59  |
| O35-Mo4-O36-Mo8* | -0.66   | C57-C54-C56-C59*  | -0.16   | C84-Fe76-C77-C75 | 85.48   | C96-Fe97-C100-C99  | 37.56   |



|                  |         |                   |         |                  |         |                     |         |
|------------------|---------|-------------------|---------|------------------|---------|---------------------|---------|
| O37-Mo4-O36-Mo8  | -2.83   | C57-C54-C56-H66   | 176.22  | C84-Fe76-C77-C80 | -156.55 | C96-Fe97-C100-C101  | -80.36  |
| O51-Mo4-O36-Mo8  | 168.28  | H65-C54-C56-Fe55  | -118.03 | C84-Fe76-C77-H87 | -35.2   | C96-Fe97-C100-H110  | 158.34  |
| O26-Mo4-O37-Mo1  | -2.97   | H65-C54-C56-C59   | -179.53 | C85-Fe76-C77-C75 | 55.67   | C98-Fe97-C100-C99   | 80.2    |
| O26-Mo4-O37-Mo8  | -92.94  | H65-C54-C56-H66   | -3.15   | C85-Fe76-C77-C80 | 173.64  | C98-Fe97-C100-C101  | -37.71  |
| O26-Mo4-O37-P13  | 131.84  | Fe55-C54-C57-C58  | 60.84   | C85-Fe76-C77-H87 | -65.01  | C98-Fe97-C100-H110  | -159.02 |
| O29-Mo4-O37-Mo1  | -169.8  | Fe55-C54-C57-H67  | -117.83 | C75-Fe76-C78-C79 | -119.85 | C99-Fe97-C100-C101  | -117.91 |
| O29-Mo4-O37-Mo8  | 100.23  | C56-C54-C57-Fe55  | -60.5   | C75-Fe76-C78-H88 | 120.08  | C99-Fe97-C100-H110  | 120.78  |
| O29-Mo4-O37-P13  | -34.99  | C56-C54-C57-C58*  | 0.35    | C77-Fe76-C78-C75 | 38.42   | C101-Fe97-C100-C99  | 117.91  |
| O35-Mo4-O37-Mo1  | -87.26  | C56-C54-C57-H67   | -178.33 | C77-Fe76-C78-C79 | -81.43  | C101-Fe97-C100-H110 | -121.3  |
| O35-Mo4-O37-Mo8  | -177.23 | H65-C54-C57-Fe55  | 118.87  | C77-Fe76-C78-H88 | 158.5   | C102-Fe97-C100-C99  | -174.08 |
| O35-Mo4-O37-P13  | 47.55   | H65-C54-C57-C58*  | 179.71  | C79-Fe76-C78-C75 | 119.85  | C102-Fe97-C100-C101 | 68      |
| O36-Mo4-O37-Mo1  | 91.79   | H65-C54-C57-H67   | 1.04    | C79-Fe76-C78-H88 | -120.07 | C102-Fe97-C100-H110 | -53.3   |
| O36-Mo4-O37-Mo8  | 1.82    | C54-Fe55-C56-C59  | 118.21  | C80-Fe76-C78-C75 | 82.84   | C103-Fe97-C100-C99  | 167.71  |
| O36-Mo4-O37-P13  | -133.4  | C54-Fe55-C56-H66  | -120.07 | C80-Fe76-C78-C79 | -37.01  | C103-Fe97-C100-C101 | 49.8    |
| O51-Mo4-O37-Mo1  | 23.02   | C57-Fe55-C56-C54  | -38.51  | C80-Fe76-C78-H88 | -157.08 | C103-Fe97-C100-H110 | -71.5   |
| O51-Mo4-O37-Mo8  | -66.95  | C57-Fe55-C56-C59  | 79.7    | C81-Fe76-C78-C75 | -158.92 | C104-Fe97-C100-C99  | -58.01  |
| O51-Mo4-O37-P13  | 157.83  | C57-Fe55-C56-H66  | -158.58 | C81-Fe76-C78-C79 | 81.23   | C104-Fe97-C100-C101 | -175.92 |
| O21-Mo5-O17-Mo3  | 32.73   | C58-Fe55-C56-C54  | -81.55  | C81-Fe76-C78-H88 | -38.84  | C104-Fe97-C100-H110 | 62.78   |
| O22-Mo5-O17-Mo3  | -54.2   | C58-Fe55-C56-C59  | 36.66   | C82-Fe76-C78-C75 | 162.34  | C105-Fe97-C100-C99  | -92.77  |
| O25-Mo5-O17-Mo3  | -57.34  | C58-Fe55-C56-H66  | 158.38  | C82-Fe76-C78-C79 | 42.49   | C105-Fe97-C100-C101 | 149.32  |
| O34-Mo5-O17-Mo3  | -126.11 | C59-Fe55-C56-C54  | -118.21 | C82-Fe76-C78-H88 | -77.58  | C105-Fe97-C100-H110 | 28.02   |
| O50-Mo5-O17-Mo3  | 137.13  | C59-Fe55-C56-H66  | 121.72  | C83-Fe76-C78-C75 | -31.91  | C106-Fe97-C100-C99  | -135.79 |
| O17-Mo5-O21-Mo1  | -35.22  | C60-Fe55-C56-C54  | 120.3   | C83-Fe76-C78-C79 | -151.76 | C106-Fe97-C100-C101 | 106.3   |
| O22-Mo5-O21-Mo1  | 47.4    | C60-Fe55-C56-C59  | -121.48 | C83-Fe76-C78-H88 | 88.17   | C106-Fe97-C100-H110 | -15     |
| O25-Mo5-O21-Mo1  | 120.02  | C60-Fe55-C56-H66* | 0.24    | C84-Fe76-C78-C75 | -73.69  | C96-Fe97-C101-C98   | -36.34  |
| O34-Mo5-O21-Mo1  | 26.35   | C61-Fe55-C56-C54  | 78.53   | C84-Fe76-C78-C79 | 166.46  | C96-Fe97-C101-C100  | 82.01   |
| O50-Mo5-O21-Mo1  | -137.48 | C61-Fe55-C56-C59  | -163.26 | C84-Fe76-C78-H88 | 46.39   | C96-Fe97-C101-H111  | -157.91 |
| O17-Mo5-O22-Mo2  | -176.03 | C61-Fe55-C56-H66  | -41.54  | C85-Fe76-C78-C75 | -115.97 | C98-Fe97-C101-C100  | 118.35  |
| O17-Mo5-O22-Mo10 | -87.4   | C62-Fe55-C56-C54  | 48.89   | C85-Fe76-C78-C79 | 124.18  | C98-Fe97-C101-H111  | -121.57 |
| O17-Mo5-O22-P13  | 47.52   | C62-Fe55-C56-C59  | 167.1   | C85-Fe76-C78-H88 | 4.1     | C99-Fe97-C101-C98   | -79.69  |
| O21-Mo5-O22-Mo2  | 99.03   | C62-Fe55-C56-H66  | -71.18  | C75-Fe76-C79-C78 | 37.44   | C99-Fe97-C101-C100  | 38.66   |
| O21-Mo5-O22-Mo10 | -172.34 | C63-Fe55-C56-C54  | -169.43 | C75-Fe76-C79-C80 | -82.77  | C99-Fe97-C101-H111  | 158.74  |
| O21-Mo5-O22-P13  | -37.41  | C63-Fe55-C56-C59  | -51.22  | C75-Fe76-C79-H89 | 158.06  | C100-Fe97-C101-C98  | -118.35 |
| O25-Mo5-O22-Mo2  | 2.6     | C63-Fe55-C56-H66  | 70.5    | C77-Fe76-C79-C78 | 82      | C100-Fe97-C101-H111 | 120.08  |
| O25-Mo5-O22-Mo10 | 91.23   | C64-Fe55-C56-C54  | 161.35  | C77-Fe76-C79-C80 | -38.21  | C102-Fe97-C101-C98  | 106.64  |
| O25-Mo5-O22-P13  | -133.85 | C64-Fe55-C56-C59  | -80.44  | C77-Fe76-C79-H89 | -157.37 | C102-Fe97-C101-C100 | -135.01 |
| O34-Mo5-O22-Mo2  | -89.87  | C64-Fe55-C56-H66  | 41.28   | C78-Fe76-C79-C80 | -120.21 | C102-Fe97-C101-H111 | -14.92  |
| O34-Mo5-O22-Mo10 | -1.24   | C54-Fe55-C57-C58  | -119.08 | C78-Fe76-C79-H89 | 120.63  | C103-Fe97-C101-C98  | 67.03   |
| O34-Mo5-O22-P13  | 133.68  | C54-Fe55-C57-H67  | 120.19  | C80-Fe76-C79-C78 | 120.21  | C103-Fe97-C101-C100 | -174.62 |
| O50-Mo5-O22-Mo2  | -58.61  | C56-Fe55-C57-C54  | 38.82   | C80-Fe76-C79-H89 | -119.16 | C103-Fe97-C101-H111 | -54.54  |
| O50-Mo5-O22-Mo10 | 30.03   | C56-Fe55-C57-C58  | -80.26  | C81-Fe76-C79-C78 | -117.12 | C104-Fe97-C101-C98  | 33.26   |
| O50-Mo5-O22-P13  | 164.95  | C56-Fe55-C57-H67  | 159.01  | C81-Fe76-C79-C80 | 122.67  | C104-Fe97-C101-C100 | 151.61  |
| O17-Mo5-O25-Mo2* | -0.91   | C58-Fe55-C57-C54  | 119.08  | C81-Fe76-C79-H89 | 3.5     | C104-Fe97-C101-H111 | -88.31  |

|                  |         |                   |         |                  |         |                     |         |
|------------------|---------|-------------------|---------|------------------|---------|---------------------|---------|
| O21-Mo5-O25-Mo2  | -88.67  | C58-Fe55-C57-H67  | -120.74 | C82-Fe76-C79-C78 | -159.85 | C105-Fe97-C101-C98  | -172.79 |
| O22-Mo5-O25-Mo2  | -4.17   | C59-Fe55-C57-C54  | 82.61   | C82-Fe76-C79-C80 | 79.94   | C105-Fe97-C101-C100 | -54.44  |
| O34-Mo5-O25-Mo2  | 67.26   | C59-Fe55-C57-C58  | -36.47  | C82-Fe76-C79-H89 | -39.23  | C105-Fe97-C101-H111 | 65.64   |
| O50-Mo5-O25-Mo2  | 164.76  | C59-Fe55-C57-H67  | -157.2  | C83-Fe76-C79-C78 | 164.75  | C106-Fe97-C101-C98  | 150.76  |
| O17-Mo5-O34-Mo10 | 85.96   | C60-Fe55-C57-C54  | -39.86  | C83-Fe76-C79-C80 | 44.54   | C106-Fe97-C101-C100 | -90.89  |
| O21-Mo5-O34-Mo10 | 24.29   | C60-Fe55-C57-C58  | -158.93 | C83-Fe76-C79-H89 | -74.63  | C106-Fe97-C101-H111 | 29.19   |
| O22-Mo5-O34-Mo10 | 2.06    | C60-Fe55-C57-H67  | 80.33   | C84-Fe76-C79-C78 | -44.81  | C96-Fe97-C102-C103  | -57.13  |
| O25-Mo5-O34-Mo10 | -71.11  | C61-Fe55-C57-C54  | -76.82  | C84-Fe76-C79-C80 | -165.02 | C96-Fe97-C102-C106  | -175.63 |
| O50-Mo5-O34-Mo10 | -171.45 | C61-Fe55-C57-C58  | 164.1   | C84-Fe76-C79-H89 | 75.82   | C96-Fe97-C102-H112  | 63.59   |
| O23-Mo6-O16-Mo9  | -62.16  | C61-Fe55-C57-H67  | 43.37   | C85-Fe76-C79-C78 | -77.34  | C98-Fe97-C102-C103  | -93.45  |
| O29-Mo6-O16-Mo9  | 94.98   | C62-Fe55-C57-C54  | -120.14 | C85-Fe76-C79-C80 | 162.45  | C98-Fe97-C102-C106  | 148.06  |
| O42-Mo6-O16-Mo9  | 8.86    | C62-Fe55-C57-C58  | 120.78  | C85-Fe76-C79-H89 | 43.29   | C98-Fe97-C102-H112  | 27.27   |
| O43-Mo6-O16-Mo9  | -165.71 | C62-Fe55-C57-H67* | 0.04    | C75-Fe76-C80-C77 | -38.63  | C99-Fe97-C102-C103  | 141.53  |
| O47-Mo6-O16-Mo9  | 35.97   | C63-Fe55-C57-C54  | -161.96 | C75-Fe76-C80-C79 | 80.38   | C99-Fe97-C102-C106  | 23.04   |
| O16-Mo6-O23-Mo7  | 66.64   | C63-Fe55-C57-C58  | 78.96   | C75-Fe76-C80-H90 | -159.06 | C99-Fe97-C102-H112  | -97.75  |
| O29-Mo6-O23-Mo7  | 4.8     | C63-Fe55-C57-H67  | -41.77  | C77-Fe76-C80-C79 | 119.01  | C100-Fe97-C102-C103 | -177.65 |
| O42-Mo6-O23-Mo7  | -1.04   | C64-Fe55-C57-C54  | 162.83  | C77-Fe76-C80-H90 | -120.43 | C100-Fe97-C102-C106 | 63.86   |
| O43-Mo6-O23-Mo7  | 169.26  | C64-Fe55-C57-C58  | 43.76   | C78-Fe76-C80-C77 | -82.34  | C100-Fe97-C102-H112 | -56.93  |
| O47-Mo6-O23-Mo7  | -85.07  | C64-Fe55-C57-H67  | -76.98  | C78-Fe76-C80-C79 | 36.67   | C101-Fe97-C102-C103 | -136.94 |
| O16-Mo6-O29-Mo4  | -119.17 | C54-Fe55-C58-C57  | 38.17   | C78-Fe76-C80-H90 | 157.22  | C101-Fe97-C102-C106 | 104.56  |
| O23-Mo6-O29-Mo4  | -55.98  | C54-Fe55-C58-C59  | -82.29  | C79-Fe76-C80-C77 | -119.01 | C101-Fe97-C102-H112 | -16.22  |
| O42-Mo6-O29-Mo4  | -50.4   | C54-Fe55-C58-H68  | 158.18  | C79-Fe76-C80-H90 | 120.56  | C103-Fe97-C102-C106 | -118.5  |
| O43-Mo6-O29-Mo4  | 139.4   | C56-Fe55-C58-C57  | 82.94   | C81-Fe76-C80-C77 | 164.21  | C103-Fe97-C102-H112 | 120.72  |
| O47-Mo6-O29-Mo4  | 36.62   | C56-Fe55-C58-C59  | -37.52  | C81-Fe76-C80-C79 | -76.78  | C104-Fe97-C102-C103 | 37.75   |
| O16-Mo6-O42-Mo7  | -94.07  | C56-Fe55-C58-H68  | -157.05 | C81-Fe76-C80-H90 | 43.77   | C104-Fe97-C102-C106 | -80.74  |
| O16-Mo6-O42-Mo9  | -4.99   | C57-Fe55-C58-C59  | -120.46 | C82-Fe76-C80-C77 | 124.86  | C104-Fe97-C102-H112 | 158.47  |
| O16-Mo6-O42-P13  | 129.55  | C57-Fe55-C58-H68  | 120.01  | C82-Fe76-C80-C79 | -116.13 | C105-Fe97-C102-C103 | 80.9    |
| O23-Mo6-O42-Mo7* | 0.66    | C59-Fe55-C58-C57  | 120.46  | C82-Fe76-C80-H90 | 4.42    | C105-Fe97-C102-C106 | -37.6   |
| O23-Mo6-O42-Mo9  | 89.75   | C59-Fe55-C58-H68  | -119.53 | C83-Fe76-C80-C77 | 82.41   | C105-Fe97-C102-H112 | -158.39 |
| O23-Mo6-O42-P13  | -135.72 | C60-Fe55-C58-C57  | 159.72  | C83-Fe76-C80-C79 | -158.58 | C106-Fe97-C102-C103 | 118.5   |
| O29-Mo6-O42-Mo7  | -176.79 | C60-Fe55-C58-C59  | 39.26   | C83-Fe76-C80-H90 | -38.02  | C106-Fe97-C102-H112 | -120.78 |
| O29-Mo6-O42-Mo9  | -87.7   | C60-Fe55-C58-H68  | -80.27  | C84-Fe76-C80-C77 | 52.14   | C96-Fe97-C103-C102  | 148.42  |
| O29-Mo6-O42-P13  | 46.83   | C61-Fe55-C58-C57  | -41.13  | C84-Fe76-C80-C79 | 171.15  | C96-Fe97-C103-C104  | -92.95  |
| O43-Mo6-O42-Mo7  | -63.57  | C61-Fe55-C58-C59  | -161.59 | C84-Fe76-C80-H90 | -68.29  | C96-Fe97-C103-H113  | 27.87   |
| O43-Mo6-O42-Mo9  | 25.51   | C61-Fe55-C58-H68  | 78.88   | C85-Fe76-C80-C77 | -171.44 | C98-Fe97-C103-C102  | 105.46  |
| O43-Mo6-O42-P13  | 160.04  | C62-Fe55-C58-C57  | -78.86  | C85-Fe76-C80-C79 | -52.43  | C98-Fe97-C103-C104  | -135.9  |
| O47-Mo6-O42-Mo7  | 98.48   | C62-Fe55-C58-C59  | 160.68  | C85-Fe76-C80-H90 | 68.12   | C98-Fe97-C103-H113  | -15.09  |
| O47-Mo6-O42-Mo9  | -172.43 | C62-Fe55-C58-H68  | 41.15   | C75-Fe76-C81-C82 | 170.95  | C99-Fe97-C103-C102  | -173.75 |
| O47-Mo6-O42-P13  | -37.9   | C63-Fe55-C58-C57  | -121.2  | C75-Fe76-C81-C85 | 50.9    | C99-Fe97-C103-C104  | -55.11  |
| O16-Mo6-O47-Mo12 | 28.01   | C63-Fe55-C58-C59  | 118.34  | C75-Fe76-C81-H95 | -69.84  | C99-Fe97-C103-H113  | 65.7    |
| O23-Mo6-O47-Mo12 | 123.89  | C63-Fe55-C58-H68  | -1.19   | C77-Fe76-C81-C82 | -36.4   | C100-Fe97-C103-C102 | 19.92   |
| O29-Mo6-O47-Mo12 | -30.2   | C64-Fe55-C58-C57  | -163.09 | C77-Fe76-C81-C85 | -156.45 | C100-Fe97-C103-C104 | 138.56  |
| O42-Mo6-O47-Mo12 | 53.06   | C64-Fe55-C58-C59  | 76.45   | C77-Fe76-C81-H95 | 82.81   | C100-Fe97-C103-H113 | -100.63 |

|                  |         |                  |         |                  |         |                     |         |
|------------------|---------|------------------|---------|------------------|---------|---------------------|---------|
| O43-Mo6-O47-Mo12 | -130.25 | C64-Fe55-C58-H68 | -43.08  | C78-Fe76-C81-C82 | -154.26 | C101-Fe97-C103-C102 | 65.77   |
| O15-Mo7-O23-Mo6  | -175.18 | C54-Fe55-C59-C56 | -38.72  | C78-Fe76-C81-C85 | 85.7    | C101-Fe97-C103-C104 | -175.59 |
| O24-Mo7-O23-Mo6  | 18.7    | C54-Fe55-C59-C58 | 81.09   | C78-Fe76-C81-H95 | -35.04  | C101-Fe97-C103-H113 | -54.78  |
| O27-Mo7-O23-Mo6  | 84.66   | C54-Fe55-C59-H69 | -158.63 | C79-Fe76-C81-C82 | -112.54 | C102-Fe97-C103-C104 | 118.64  |
| O32-Mo7-O23-Mo6  | -71.5   | C56-Fe55-C59-C58 | 119.81  | C79-Fe76-C81-C85 | 127.42  | C102-Fe97-C103-H113 | -120.55 |
| O42-Mo7-O23-Mo6  | 1.06    | C56-Fe55-C59-H69 | -119.92 | C79-Fe76-C81-H95 | 6.68    | C104-Fe97-C103-C102 | -118.64 |
| O15-Mo7-O24-Mo10 | -127.95 | C57-Fe55-C59-C56 | -83.07  | C80-Fe76-C81-C82 | -71.18  | C104-Fe97-C103-H113 | 120.81  |
| O23-Mo7-O24-Mo10 | 38.13   | C57-Fe55-C59-C58 | 36.73   | C80-Fe76-C81-C85 | 168.78  | C105-Fe97-C103-C102 | -81.63  |
| O27-Mo7-O24-Mo10 | -27.41  | C57-Fe55-C59-H69 | 157.01  | C80-Fe76-C81-H95 | 48.04   | C105-Fe97-C103-C104 | 37      |
| O32-Mo7-O24-Mo10 | 126.28  | C58-Fe55-C59-C56 | -119.81 | C82-Fe76-C81-C85 | -120.04 | C105-Fe97-C103-H113 | 157.81  |
| O42-Mo7-O24-Mo10 | 54.8    | C58-Fe55-C59-H69 | 120.28  | C82-Fe76-C81-H95 | 119.21  | C106-Fe97-C103-C102 | -38.12  |
| O15-Mo7-O27-Mo11 | 134.5   | C60-Fe55-C59-C56 | 76.19   | C83-Fe76-C81-C82 | 38.45   | C106-Fe97-C103-C104 | 80.52   |
| O23-Mo7-O27-Mo11 | -124.75 | C60-Fe55-C59-C58 | -164.01 | C83-Fe76-C81-C85 | -81.59  | C106-Fe97-C103-H113 | -158.67 |
| O24-Mo7-O27-Mo11 | 32.47   | C60-Fe55-C59-H69 | -43.73  | C83-Fe76-C81-H95 | 157.67  | C96-Fe97-C104-C103  | 104.74  |
| O32-Mo7-O27-Mo11 | -59.07  | C61-Fe55-C59-C56 | 42.47   | C84-Fe76-C81-C82 | 82.95   | C96-Fe97-C104-C105  | -135.55 |
| O42-Mo7-O27-Mo11 | -53.41  | C61-Fe55-C59-C58 | 162.27  | C84-Fe76-C81-C85 | -37.1   | C96-Fe97-C104-H114  | -15.24  |
| O15-Mo7-O32-Mo9  | 170.84  | C61-Fe55-C59-H69 | -77.45  | C84-Fe76-C81-H95 | -157.84 | C98-Fe97-C104-C103  | 67.32   |
| O23-Mo7-O32-Mo9  | 69.95   | C62-Fe55-C59-C56 | -168.08 | C85-Fe76-C81-C82 | 120.04  | C98-Fe97-C104-C105  | -172.97 |
| O24-Mo7-O32-Mo9  | -84.95  | C62-Fe55-C59-C58 | -48.27  | C85-Fe76-C81-H95 | -120.74 | C98-Fe97-C104-H114  | -52.66  |
| O27-Mo7-O32-Mo9  | 4.59    | C62-Fe55-C59-H69 | 72      | C75-Fe76-C82-C81 | -167.12 | C99-Fe97-C104-C103  | 148.03  |
| O42-Mo7-O32-Mo9  | -1.31   | C63-Fe55-C59-C56 | 159.01  | C75-Fe76-C82-C83 | -48.48  | C99-Fe97-C104-C105  | -92.26  |
| O15-Mo7-O42-Mo6  | 25.47   | C63-Fe55-C59-C58 | -81.18  | C75-Fe76-C82-H91 | 72.81   | C99-Fe97-C104-H114  | 28.05   |
| O15-Mo7-O42-Mo9  | -64.3   | C63-Fe55-C59-H69 | 39.1    | C77-Fe76-C82-C81 | 167.01  | C100-Fe97-C104-C103 | -174.54 |
| O15-Mo7-O42-P13  | 160.9   | C64-Fe55-C59-C56 | 118.11  | C77-Fe76-C82-C83 | -74.35  | C100-Fe97-C104-C105 | -54.83  |
| O23-Mo7-O42-Mo6* | -0.62   | C64-Fe55-C59-C58 | -122.09 | C77-Fe76-C82-H91 | 46.94   | C100-Fe97-C104-H114 | 65.49   |
| O23-Mo7-O42-Mo9  | -90.39  | C64-Fe55-C59-H69 | -1.81   | C78-Fe76-C82-C81 | 55.87   | C101-Fe97-C104-C103 | 37.03   |
| O23-Mo7-O42-P13  | 134.81  | C54-Fe55-C60-C61 | -79.23  | C78-Fe76-C82-C83 | 174.51  | C101-Fe97-C104-C105 | 156.74  |
| O24-Mo7-O42-Mo6  | -173.24 | C54-Fe55-C60-C64 | 162.37  | C78-Fe76-C82-H91 | -64.2   | C101-Fe97-C104-H114 | -82.95  |
| O24-Mo7-O42-Mo9  | 96.99   | C54-Fe55-C60-H70 | 40.26   | C79-Fe76-C82-C81 | 85.26   | C102-Fe97-C104-C103 | -38.27  |
| O24-Mo7-O42-P13  | -37.81  | C56-Fe55-C60-C61 | -121.35 | C79-Fe76-C82-C83 | -156.1  | C102-Fe97-C104-C105 | 81.43   |
| O27-Mo7-O42-Mo6  | -86.79  | C56-Fe55-C60-C64 | 120.25  | C79-Fe76-C82-H91 | -34.81  | C102-Fe97-C104-H114 | -158.25 |
| O27-Mo7-O42-Mo9  | -176.56 | C56-Fe55-C60-H70 | -1.86   | C80-Fe76-C82-C81 | 126.37  | C103-Fe97-C104-C105 | 119.71  |
| O27-Mo7-O42-P13  | 48.64   | C57-Fe55-C60-C61 | -49.6   | C80-Fe76-C82-C83 | -114.99 | C103-Fe97-C104-H114 | -119.98 |
| O32-Mo7-O42-Mo6  | 90.58   | C57-Fe55-C60-C64 | -168    | C80-Fe76-C82-H91 | 6.3     | C105-Fe97-C104-C103 | -119.71 |
| O32-Mo7-O42-Mo9* | 0.81    | C57-Fe55-C60-H70 | 69.9    | C81-Fe76-C82-C83 | 118.64  | C105-Fe97-C104-H114 | 120.32  |
| O32-Mo7-O42-P13  | -133.99 | C58-Fe55-C60-C61 | 169.18  | C81-Fe76-C82-H91 | -120.07 | C106-Fe97-C104-C103 | -82.44  |
| O36-Mo8-O28-Mo9  | -127.76 | C58-Fe55-C60-C64 | 50.78   | C83-Fe76-C82-C81 | -118.64 | C106-Fe97-C104-C105 | 37.27   |
| O37-Mo8-O28-Mo9  | -56.89  | C58-Fe55-C60-H70 | -71.33  | C83-Fe76-C82-H91 | 121.29  | C106-Fe97-C104-H114 | 157.59  |
| O38-Mo8-O28-Mo9  | 30.41   | C59-Fe55-C60-C61 | -162.33 | C84-Fe76-C82-C81 | -80.15  | C96-Fe97-C105-C104  | 66.36   |
| O39-Mo8-O28-Mo9  | -64.7   | C59-Fe55-C60-C64 | 79.27   | C84-Fe76-C82-C83 | 38.5    | C96-Fe97-C105-C106  | -173.8  |
| O53-Mo8-O28-Mo9  | 133.6   | C59-Fe55-C60-H70 | -42.83  | C84-Fe76-C82-H91 | 159.79  | C96-Fe97-C105-H115  | -53.9   |
| O28-Mo8-O36-Mo4  | 86.69   | C61-Fe55-C60-C64 | -118.4  | C85-Fe76-C82-C81 | -36.66  | C98-Fe97-C105-C104  | 48.09   |
| O37-Mo8-O36-Mo4  | 2.87    | C61-Fe55-C60-H70 | 119.49  | C85-Fe76-C82-C83 | 81.98   | C98-Fe97-C105-C106  | 167.93  |

|                  |         |                   |         |                  |         |                     |         |
|------------------|---------|-------------------|---------|------------------|---------|---------------------|---------|
| O38-Mo8-O36-Mo4  | 23.27   | C62-Fe55-C60-C61  | 38.44   | C85-Fe76-C82-H91 | -156.73 | C98-Fe97-C105-H115  | -72.17  |
| O39-Mo8-O36-Mo4  | -68.84  | C62-Fe55-C60-C64  | -79.96  | C75-Fe76-C83-C82 | 164.41  | C99-Fe97-C105-C104  | 103.75  |
| O53-Mo8-O36-Mo4  | -171.4  | C62-Fe55-C60-H70  | 157.94  | C75-Fe76-C83-C84 | -77.51  | C99-Fe97-C105-C106  | -136.41 |
| O28-Mo8-O37-Mo1  | -175.73 | C63-Fe55-C60-C61  | 81.72   | C75-Fe76-C83-H92 | 43.33   | C99-Fe97-C105-H115  | -16.51  |
| O28-Mo8-O37-Mo4  | -86.67  | C63-Fe55-C60-C64  | -36.68  | C77-Fe76-C83-C82 | 124.05  | C100-Fe97-C105-C104 | 147.85  |
| O28-Mo8-O37-P13  | 49.16   | C63-Fe55-C60-H70  | -158.79 | C77-Fe76-C83-C84 | -117.87 | C100-Fe97-C105-C106 | -92.31  |
| O36-Mo8-O37-Mo1  | -90.74  | C64-Fe55-C60-C61  | 118.4   | C77-Fe76-C83-H92 | 2.97    | C100-Fe97-C105-H115 | 27.59   |
| O36-Mo8-O37-Mo4  | -1.68   | C64-Fe55-C60-H70  | -122.11 | C78-Fe76-C83-C82 | -170.35 | C101-Fe97-C105-C104 | -176.48 |
| O36-Mo8-O37-P13  | 134.15  | C54-Fe55-C61-C60  | 119.26  | C78-Fe76-C83-C84 | -52.27  | C101-Fe97-C105-C106 | -56.64  |
| O38-Mo8-O37-Mo1  | 97.58   | C54-Fe55-C61-C62  | -122.65 | C78-Fe76-C83-H92 | 68.57   | C101-Fe97-C105-H115 | 63.26   |
| O38-Mo8-O37-Mo4  | -173.36 | C54-Fe55-C61-H71* | -0.88   | C79-Fe76-C83-C82 | 50.71   | C102-Fe97-C105-C104 | -81.75  |
| O38-Mo8-O37-P13  | -37.52  | C56-Fe55-C61-C60  | 76.72   | C79-Fe76-C83-C84 | 168.78  | C102-Fe97-C105-C106 | 38.09   |
| O39-Mo8-O37-Mo1* | 0.46    | C56-Fe55-C61-C62  | -165.19 | C79-Fe76-C83-H92 | -70.37  | C102-Fe97-C105-H115 | 157.99  |
| O39-Mo8-O37-Mo4  | 89.52   | C56-Fe55-C61-H71  | -43.42  | C80-Fe76-C83-C82 | 81.44   | C103-Fe97-C105-C104 | -37.42  |
| O39-Mo8-O37-P13  | -134.65 | C57-Fe55-C61-C60  | 161.11  | C80-Fe76-C83-C84 | -160.49 | C103-Fe97-C105-C106 | 82.42   |
| O53-Mo8-O37-Mo1  | -60.66  | C57-Fe55-C61-C62  | -80.8   | C80-Fe76-C83-H92 | -39.65  | C103-Fe97-C105-H115 | -157.68 |
| O53-Mo8-O37-Mo4  | 28.4    | C57-Fe55-C61-H71  | 40.97   | C81-Fe76-C83-C82 | -37.62  | C104-Fe97-C105-C106 | 119.84  |
| O53-Mo8-O37-P13  | 164.24  | C58-Fe55-C61-C60  | -168.53 | C81-Fe76-C83-C84 | 80.46   | C104-Fe97-C105-H115 | -120.26 |
| O28-Mo8-O38-Mo2  | -31.55  | C58-Fe55-C61-C62  | -50.44  | C81-Fe76-C83-H92 | -158.7  | C106-Fe97-C105-C104 | -119.84 |
| O36-Mo8-O38-Mo2  | 31.14   | C58-Fe55-C61-H71  | 71.34   | C82-Fe76-C83-C84 | 118.08  | C106-Fe97-C105-H115 | 119.9   |
| O37-Mo8-O38-Mo2  | 50.3    | C59-Fe55-C61-C60  | 45.41   | C82-Fe76-C83-H92 | -121.08 | C96-Fe97-C106-C102  | 158.94  |
| O39-Mo8-O38-Mo2  | 120.86  | C59-Fe55-C61-C62  | 163.51  | C84-Fe76-C83-C82 | -118.08 | C96-Fe97-C106-C105  | 40.09   |
| O53-Mo8-O38-Mo2  | -133.98 | C59-Fe55-C61-H71  | -74.72  | C84-Fe76-C83-H92 | 120.84  | C96-Fe97-C106-H116  | -81.2   |
| O28-Mo8-O39-Mo1  | 7.49    | C60-Fe55-C61-C62  | 118.09  | C85-Fe76-C83-C82 | -80.42  | C98-Fe97-C106-C102  | -58.67  |
| O36-Mo8-O39-Mo1  | 70.07   | C60-Fe55-C61-H71  | -120.13 | C85-Fe76-C83-C84 | 37.66   | C98-Fe97-C106-C105  | -177.52 |
| O37-Mo8-O39-Mo1* | -0.68   | C62-Fe55-C61-C60  | -118.09 | C85-Fe76-C83-H92 | 158.5   | C98-Fe97-C106-H116  | 61.19   |
| O38-Mo8-O39-Mo1  | -85.32  | C62-Fe55-C61-H71  | 121.77  | C75-Fe76-C84-C83 | 123.64  | C99-Fe97-C106-C102  | -176.78 |
| O53-Mo8-O39-Mo1  | 169.17  | C63-Fe55-C61-C60  | -80.65  | C75-Fe76-C84-C85 | -117.77 | C99-Fe97-C106-C105  | 64.38   |
| O20-Mo9-O16-Mo6  | -15.08  | C63-Fe55-C61-C62  | 37.44   | C75-Fe76-C84-H93 | 4.1     | C99-Fe97-C106-H116  | -56.92  |
| O28-Mo9-O16-Mo6  | -94.7   | C63-Fe55-C61-H71  | 159.22  | C77-Fe76-C84-C83 | 79.54   | C100-Fe97-C106-C102 | -137.33 |
| O32-Mo9-O16-Mo6  | 61.18   | C64-Fe55-C61-C60  | -37.81  | C77-Fe76-C84-C85 | -161.88 | C100-Fe97-C106-C105 | 103.83  |
| O42-Mo9-O16-Mo6  | -8.82   | C64-Fe55-C61-C62  | 80.28   | C77-Fe76-C84-H93 | -40.01  | C100-Fe97-C106-H116 | -17.47  |
| O44-Mo9-O16-Mo6  | 162.75  | C64-Fe55-C61-H71  | -157.95 | C78-Fe76-C84-C83 | 164.96  | C101-Fe97-C106-C102 | -93.19  |
| O16-Mo9-O20-Mo2  | -45.53  | C54-Fe55-C62-C61  | 76.3    | C78-Fe76-C84-C85 | -76.45  | C101-Fe97-C106-C105 | 147.97  |
| O28-Mo9-O20-Mo2  | 35.78   | C54-Fe55-C62-C63  | -164.93 | C78-Fe76-C84-H93 | 45.42   | C101-Fe97-C106-H116 | 26.67   |
| O32-Mo9-O20-Mo2  | -122.31 | C54-Fe55-C62-H72  | -44.45  | C79-Fe76-C84-C83 | -159.79 | C102-Fe97-C106-C105 | -118.85 |
| O42-Mo9-O20-Mo2  | -51.44  | C56-Fe55-C62-C61  | 39.44   | C79-Fe76-C84-C85 | -41.21  | C102-Fe97-C106-H116 | 119.86  |
| O44-Mo9-O20-Mo2  | 136.62  | C56-Fe55-C62-C63  | 158.22  | C79-Fe76-C84-H93 | 80.66   | C103-Fe97-C106-C102 | 38.25   |
| O16-Mo9-O28-Mo8  | 123.32  | C56-Fe55-C62-H72  | -81.3   | C80-Fe76-C84-C83 | 42.68   | C103-Fe97-C106-C105 | -80.6   |
| O20-Mo9-O28-Mo8  | -29.64  | C57-Fe55-C62-C61  | 119.43  | C80-Fe76-C84-C85 | 161.26  | C103-Fe97-C106-H116 | 158.1   |
| O32-Mo9-O28-Mo8  | 35.85   | C57-Fe55-C62-C63  | -121.8  | C80-Fe76-C84-H93 | -76.87  | C104-Fe97-C106-C102 | 81.89   |
| O42-Mo9-O28-Mo8  | 53.72   | C57-Fe55-C62-H72  | -1.31   | C81-Fe76-C84-C83 | -82.04  | C104-Fe97-C106-C105 | -36.96  |
| O44-Mo9-O28-Mo8  | -131.72 | C58-Fe55-C62-C61  | 161.13  | C81-Fe76-C84-C85 | 36.54   | C104-Fe97-C106-H116 | -158.25 |

|                  |         |                   |         |                  |         |                      |         |
|------------------|---------|-------------------|---------|------------------|---------|----------------------|---------|
| O16-Mo9-O32-Mo7  | -67.92  | C58-Fe55-C62-C63  | -80.1   | C81-Fe76-C84-H93 | 158.42  | C105-Fe97-C106-C102  | 118.85  |
| O20-Mo9-O32-Mo7  | 85.47   | C58-Fe55-C62-H72  | 40.38   | C82-Fe76-C84-C83 | -38.56  | C105-Fe97-C106-H116  | -121.3  |
| O28-Mo9-O32-Mo7  | 20.27   | C59-Fe55-C62-C61  | -163.83 | C82-Fe76-C84-C85 | 80.03   | C96-C98-C101-Fe97    | 58.9    |
| O42-Mo9-O32-Mo7  | 1.31    | C59-Fe55-C62-C63  | -45.06  | C82-Fe76-C84-H93 | -158.1  | C96-C98-C101-C100*   | -0.29   |
| O44-Mo9-O32-Mo7  | -172.16 | C59-Fe55-C62-H72  | 75.43   | C83-Fe76-C84-C85 | 118.58  | C96-C98-C101-H111    | 178.87  |
| O16-Mo9-O42-Mo6  | 5.18    | C60-Fe55-C62-C61  | -38.55  | C83-Fe76-C84-H93 | -119.55 | Fe97-C98-C101-C100   | -59.19  |
| O16-Mo9-O42-Mo7  | 94.29   | C60-Fe55-C62-C63  | 80.22   | C85-Fe76-C84-C83 | -118.58 | Fe97-C98-C101-H111   | 119.98  |
| O16-Mo9-O42-P13  | -129.65 | C60-Fe55-C62-H72  | -159.29 | C85-Fe76-C84-H93 | 121.87  | H108-C98-C101-Fe97   | -117.54 |
| O20-Mo9-O42-Mo6  | -177.71 | C61-Fe55-C62-C63  | 118.77  | C75-Fe76-C85-C81 | -157.88 | H108-C98-C101-C100   | -176.73 |
| O20-Mo9-O42-Mo7  | -88.61  | C61-Fe55-C62-H72  | -120.74 | C75-Fe76-C85-C84 | 81.86   | H108-C98-C101-H111   | 2.43    |
| O20-Mo9-O42-P13  | 47.46   | C63-Fe55-C62-C61  | -118.77 | C75-Fe76-C85-H94 | -38.19  | C96-C99-C100-Fe97    | -61.48  |
| O28-Mo9-O42-Mo6  | 97.75   | C63-Fe55-C62-H72  | 120.48  | C77-Fe76-C85-C81 | 161.95  | C96-C99-C100-C101*   | -0.58   |
| O28-Mo9-O42-Mo7  | -173.14 | C64-Fe55-C62-C61  | -82.16  | C77-Fe76-C85-C84 | 41.69   | C96-C99-C100-H110    | -179.92 |
| O28-Mo9-O42-P13  | -37.08  | C64-Fe55-C62-C63  | 36.61   | C77-Fe76-C85-H94 | -78.36  | Fe97-C99-C100-C101   | 60.9    |
| O32-Mo9-O42-Mo6  | -89.9   | C64-Fe55-C62-H72  | 157.09  | C78-Fe76-C85-C81 | -114.1  | Fe97-C99-C100-H110   | -118.43 |
| O32-Mo9-O42-Mo7* | -0.79   | C54-Fe55-C63-C62  | 40.47   | C78-Fe76-C85-C84 | 125.64  | H109-C99-C100-Fe97   | 117.73  |
| O32-Mo9-O42-P13  | 135.27  | C54-Fe55-C63-C64  | 160.71  | C78-Fe76-C85-H94 | 5.59    | H109-C99-C100-C101   | 178.63  |
| O44-Mo9-O42-Mo6  | -49.83  | C54-Fe55-C63-H73  | -78.9   | C79-Fe76-C85-C81 | -72.2   | H109-C99-C100-H110*  | -0.7    |
| O44-Mo9-O42-Mo7  | 39.28   | C56-Fe55-C63-C62  | -160.91 | C79-Fe76-C85-C84 | 167.54  | Fe97-C100-C101-C98   | 61.42   |
| O44-Mo9-O42-P13  | 175.34  | C56-Fe55-C63-C64  | -40.67  | C79-Fe76-C85-H94 | 47.49   | Fe97-C100-C101-H111  | -117.74 |
| O22-Mo10-O14-Mo2 | 3.32    | C56-Fe55-C63-H73  | 79.72   | C80-Fe76-C85-C81 | -32.04  | C99-C100-C101-Fe97   | -60.88  |
| O24-Mo10-O14-Mo2 | 87.35   | C57-Fe55-C63-C62  | 78.15   | C80-Fe76-C85-C84 | -152.3  | C99-C100-C101-C98*   | 0.54    |
| O31-Mo10-O14-Mo2 | 26.75   | C57-Fe55-C63-C64  | -161.61 | C80-Fe76-C85-H94 | 87.65   | C99-C100-C101-H111   | -178.62 |
| O34-Mo10-O14-Mo2 | -68.57  | C57-Fe55-C63-H73  | -41.22  | C81-Fe76-C85-C84 | -120.26 | H110-C100-C101-Fe97  | 118.45  |
| O52-Mo10-O14-Mo2 | -171.59 | C58-Fe55-C63-C62  | 120.04  | C81-Fe76-C85-H94 | 119.69  | H110-C100-C101-C98*  | 179.87  |
| O14-Mo10-O22-Mo2 | -1.96   | C58-Fe55-C63-C64  | -119.72 | C82-Fe76-C85-C81 | 37.22   | H110-C100-C101-H111* | 0.71    |
| O14-Mo10-O22-Mo5 | -91.09  | C58-Fe55-C63-H73* | 0.68    | C82-Fe76-C85-C84 | -83.04  | Fe97-C102-C103-C104  | -60.69  |
| O14-Mo10-O22-P13 | 133.44  | C59-Fe55-C63-C62  | 161.96  | C82-Fe76-C85-H94 | 156.91  | Fe97-C102-C103-H113  | 118.42  |
| O24-Mo10-O22-Mo2 | -86.81  | C59-Fe55-C63-C64  | -77.8   | C83-Fe76-C85-C81 | 81.81   | C106-C102-C103-Fe97  | 60.25   |
| O24-Mo10-O22-Mo5 | -175.94 | C59-Fe55-C63-H73  | 42.6    | C83-Fe76-C85-C84 | -38.45  | C106-C102-C103-C104* | -0.45   |
| O24-Mo10-O22-P13 | 48.59   | C60-Fe55-C63-C62  | -82.92  | C83-Fe76-C85-H94 | -158.5  | C106-C102-C103-H113  | 178.67  |
| O31-Mo10-O22-Mo2 | -172.13 | C60-Fe55-C63-C64  | 37.32   | C84-Fe76-C85-C81 | 120.26  | H112-C102-C103-Fe97  | -119.82 |
| O31-Mo10-O22-Mo5 | 98.74   | C60-Fe55-C63-H73  | 157.72  | C84-Fe76-C85-H94 | -120.05 | H112-C102-C103-C104  | 179.49  |
| O31-Mo10-O22-P13 | -36.73  | C61-Fe55-C63-C62  | -38.34  | C75-C77-C80-Fe76 | 60.54   | H112-C102-C103-H113  | -1.39   |
| O34-Mo10-O22-Mo2 | 90.46   | C61-Fe55-C63-C64  | 81.9    | C75-C77-C80-C79* | -0.29   | Fe97-C102-C106-C105  | 60.4    |
| O34-Mo10-O22-Mo5 | 1.33    | C61-Fe55-C63-H73  | -157.71 | C75-C77-C80-H90  | 177.46  | Fe97-C102-C106-H116  | -117.14 |
| O34-Mo10-O22-P13 | -134.15 | C62-Fe55-C63-C64  | 120.24  | Fe76-C77-C80-C79 | -60.83  | C103-C102-C106-Fe97  | -60.08  |
| O52-Mo10-O22-Mo2 | 30.83   | C62-Fe55-C63-H73  | -119.37 | Fe76-C77-C80-H90 | 116.92  | C103-C102-C106-C105* | 0.33    |
| O52-Mo10-O22-Mo5 | -58.3   | C64-Fe55-C63-C62  | -120.24 | H87-C77-C80-Fe76 | -118.74 | C103-C102-C106-H116  | -177.22 |
| O52-Mo10-O22-P13 | 166.23  | C64-Fe55-C63-H73  | 120.4   | H87-C77-C80-C79  | -179.58 | H112-C102-C106-Fe97  | 119.99  |
| O14-Mo10-O24-Mo7 | -129.8  | C54-Fe55-C64-C60  | -43.1   | H87-C77-C80-H90  | -1.82   | H112-C102-C106-C105  | -179.61 |
| O22-Mo10-O24-Mo7 | -58.39  | C54-Fe55-C64-C63  | -163.07 | C75-C78-C79-Fe76 | -57.98  | H112-C102-C106-H116  | 2.84    |

|                   |         |                  |         |                  |         |                      |         |
|-------------------|---------|------------------|---------|------------------|---------|----------------------|---------|
| O31-Mo10-O24-Mo7  | 28.2    | C54-Fe55-C64-H74 | 77.69   | C75-C78-C79-C80* | -0.26   | Fe97-C103-C104-C105  | -59.17  |
| O34-Mo10-O24-Mo7  | -64.21  | C56-Fe55-C64-C60 | -77.17  | C75-C78-C79-H89  | -176.7  | Fe97-C103-C104-H114  | 116.65  |
| O52-Mo10-O24-Mo7  | 129.96  | C56-Fe55-C64-C63 | 162.86  | Fe76-C78-C79-C80 | 57.72   | C102-C103-C104-Fe97  | 59.56   |
| O14-Mo10-O31-Mo11 | 27.33   | C56-Fe55-C64-H74 | 43.62   | Fe76-C78-C79-H89 | -118.73 | C102-C103-C104-C105* | 0.4     |
| O22-Mo10-O31-Mo11 | 49.43   | C57-Fe55-C64-C60 | 167.81  | H88-C78-C79-Fe76 | 120.18  | C102-C103-C104-H114  | 176.22  |
| O24-Mo10-O31-Mo11 | -32.82  | C57-Fe55-C64-C63 | 47.84   | H88-C78-C79-C80  | 177.9   | H113-C103-C104-Fe97  | -119.56 |
| O34-Mo10-O31-Mo11 | 120.51  | C57-Fe55-C64-H74 | -71.4   | H88-C78-C79-H89  | 1.46    | H113-C103-C104-C105  | -178.73 |
| O52-Mo10-O31-Mo11 | -134.25 | C58-Fe55-C64-C60 | -159.93 | Fe76-C79-C80-C77 | 58.92   | H113-C103-C104-H114  | -2.91   |
| O14-Mo10-O34-Mo5  | 68.86   | C58-Fe55-C64-C63 | 80.1    | Fe76-C79-C80-H90 | -118.87 | Fe97-C104-C105-C106  | -58.53  |
| O22-Mo10-O34-Mo5  | -2      | C58-Fe55-C64-H74 | -39.15  | C78-C79-C80-Fe76 | -58.58  | Fe97-C104-C105-H115  | 117.26  |
| O24-Mo10-O34-Mo5  | 4.06    | C59-Fe55-C64-C60 | -119.41 | C78-C79-C80-C77* | 0.34    | C103-C104-C105-Fe97  | 58.33   |
| O31-Mo10-O34-Mo5  | -85.75  | C59-Fe55-C64-C63 | 120.62  | C78-C79-C80-H90  | -177.45 | C103-C104-C105-C106* | -0.2    |
| O52-Mo10-O34-Mo5  | 169.82  | C59-Fe55-C64-H74 | 1.37    | H89-C79-C80-Fe76 | 117.89  | C103-C104-C105-H115  | 175.59  |
| O30-Mo11-O27-Mo7  | 23.38   | C60-Fe55-C64-C63 | -119.97 | H89-C79-C80-C77  | 176.81  | H114-C104-C105-Fe97  | -117.5  |
| O31-Mo11-O27-Mo7  | -32.87  | C60-Fe55-C64-H74 | 120.79  | H89-C79-C80-H90* | -0.98   | H114-C104-C105-C106  | -176.03 |
| O33-Mo11-O27-Mo7  | 49.63   | C61-Fe55-C64-C60 | 38.55   | Fe76-C81-C82-C83 | -59.27  | H114-C104-C105-H115* | -0.25   |
| O41-Mo11-O27-Mo7  | 122.3   | C61-Fe55-C64-C63 | -81.42  | Fe76-C81-C82-H91 | 118.58  | Fe97-C105-C106-C102  | -59.3   |
| O49-Mo11-O27-Mo7  | -132.11 | C61-Fe55-C64-H74 | 159.33  | C85-C81-C82-Fe76 | 58.98   | Fe97-C105-C106-H116  | 118.23  |
| O27-Mo11-O30-Mo3  | 32.73   | C62-Fe55-C64-C60 | 82.99   | C85-C81-C82-C83* | -0.29   | C104-C105-C106-Fe97  | 59.22   |
| O31-Mo11-O30-Mo3  | 88.96   | C62-Fe55-C64-C63 | -36.98  | C85-C81-C82-H91  | 177.56  | C104-C105-C106-C102* | -0.08   |
| O33-Mo11-O30-Mo3  | 4.92    | C62-Fe55-C64-H74 | -156.22 | H95-C81-C82-Fe76 | -117.7  | C104-C105-C106-H116  | 177.45  |
| O41-Mo11-O30-Mo3  | -67.97  | C63-Fe55-C64-C60 | 119.97  | H95-C81-C82-C83  | -176.97 | H115-C105-C106-Fe97  | -116.55 |
| O49-Mo11-O30-Mo3  | -171.47 | C63-Fe55-C64-H74 | -119.24 | H95-C81-C82-H91* | 0.88    | H115-C105-C106-C102  | -175.86 |
| O27-Mo11-O31-Mo10 | 34.01   | C54-C56-C59-Fe55 | 59.8    | Fe76-C81-C85-C84 | 57.78   | H115-C105-C106-H116  | 1.68    |
| O30-Mo11-O31-Mo10 | -124.5  | C54-C56-C59-C58* | -0.09   |                  |         |                      |         |

torsional angles closer to 0° or 180°.
